# Supplementary figures and images for: Coupling Reactions of Anhydro-Aldose Tosylhydrazones with Boronic Acids
Source: MDPI journal article supplement (doi:10.3390/molecules27061795), 2022-03-09

Supplementary Materials

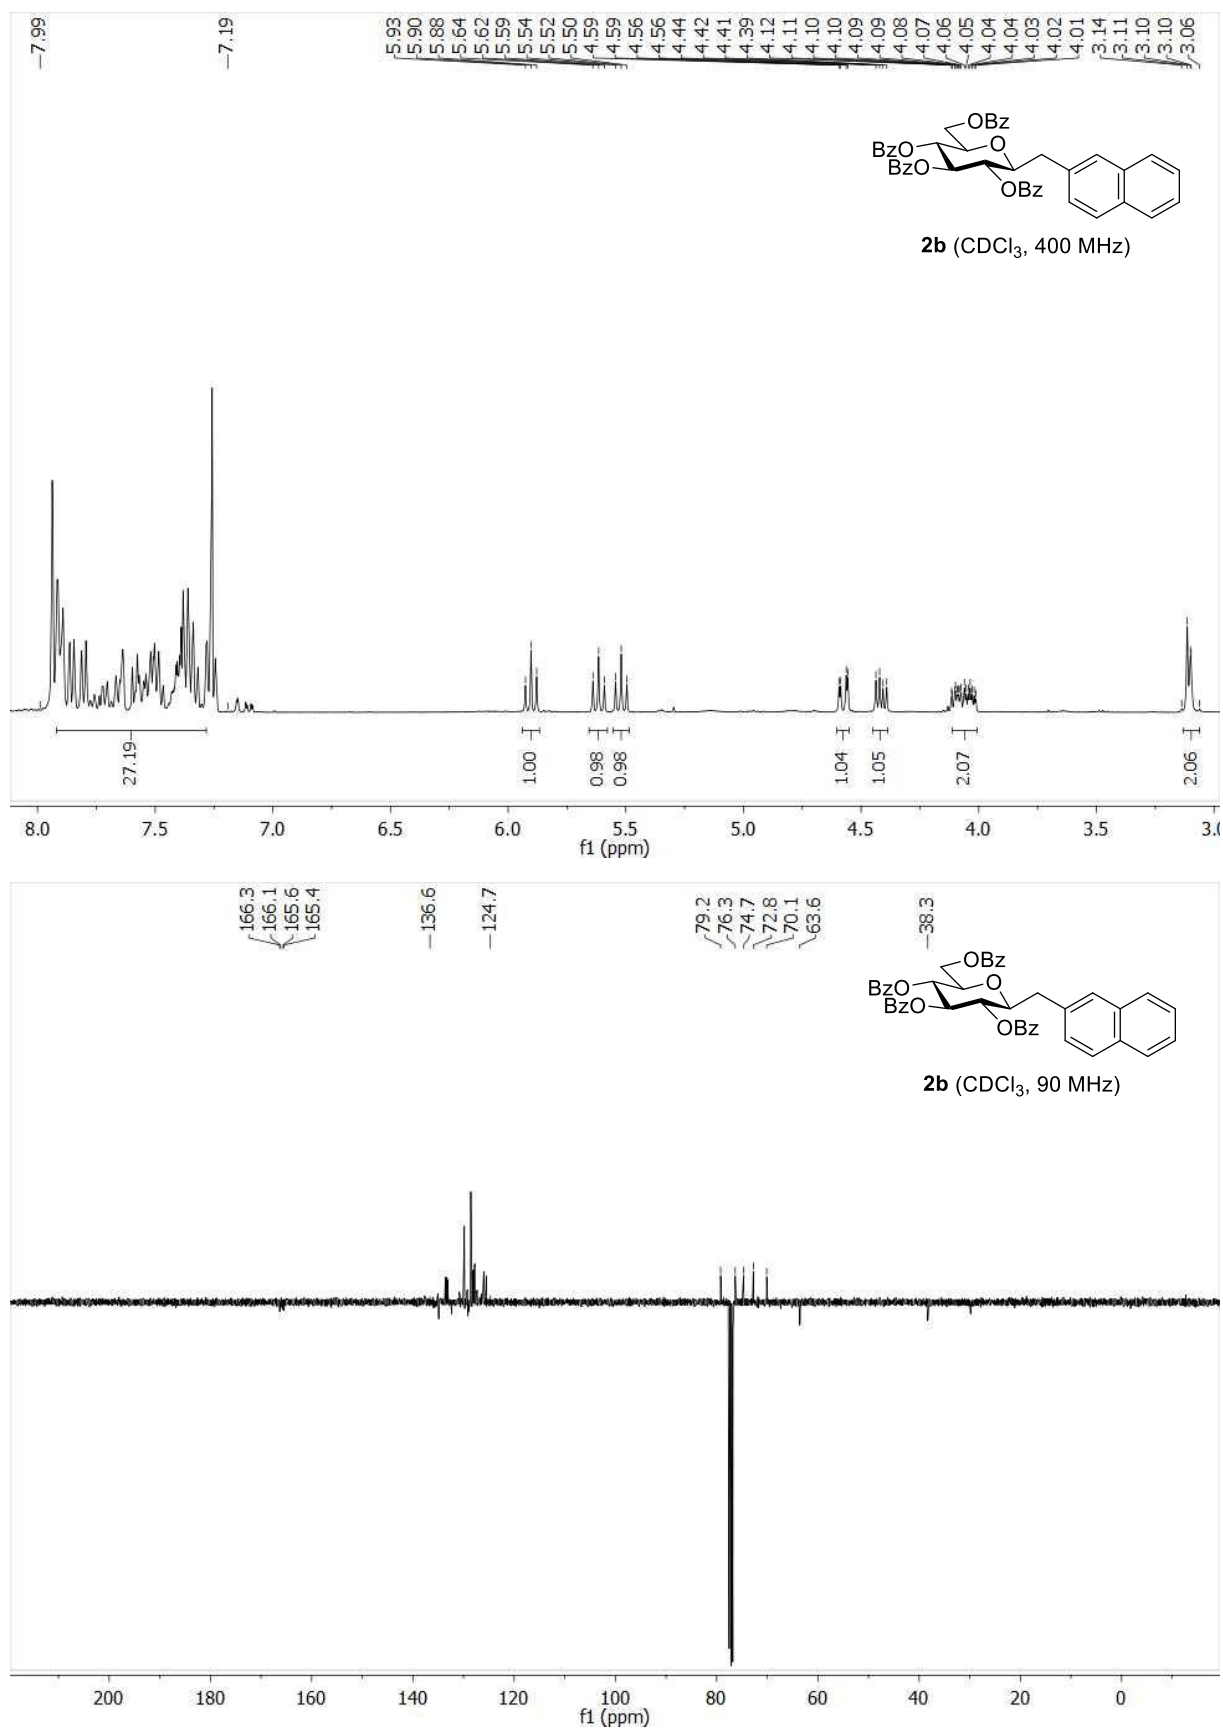

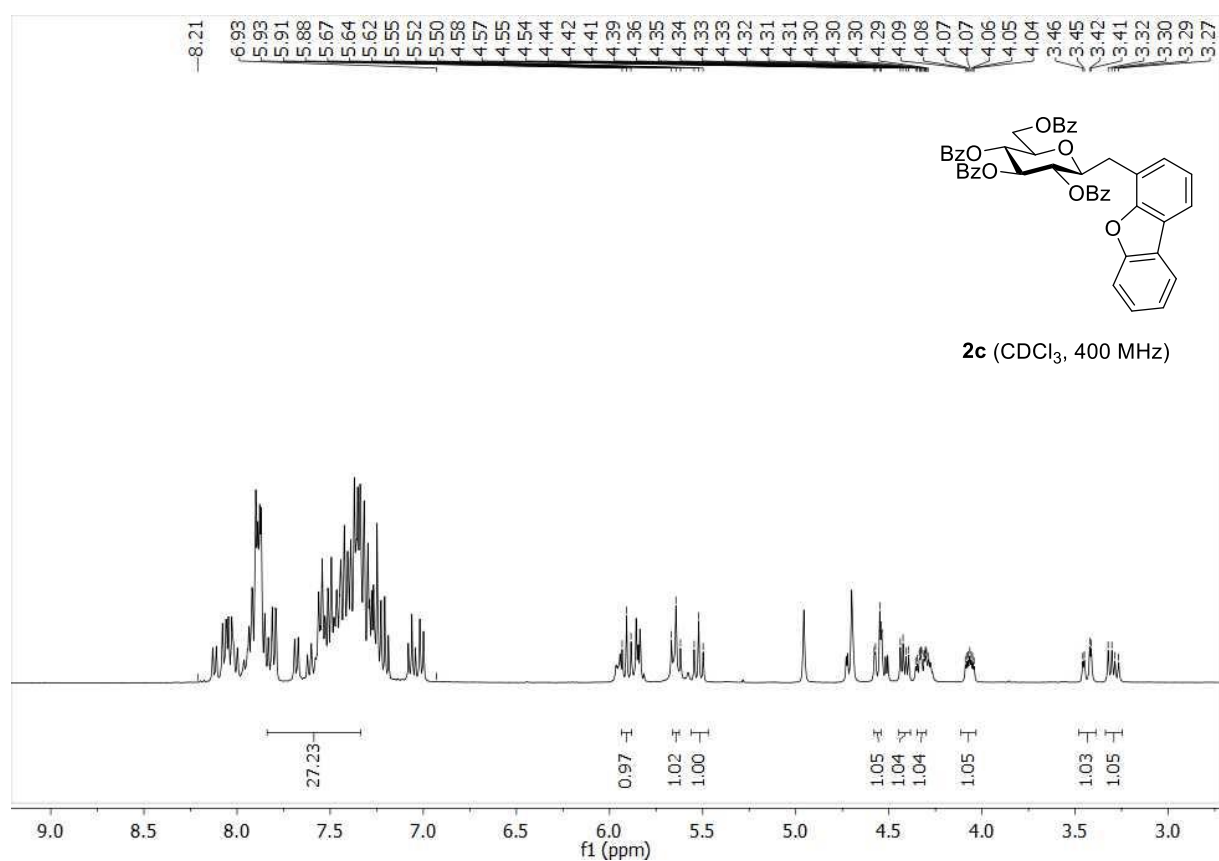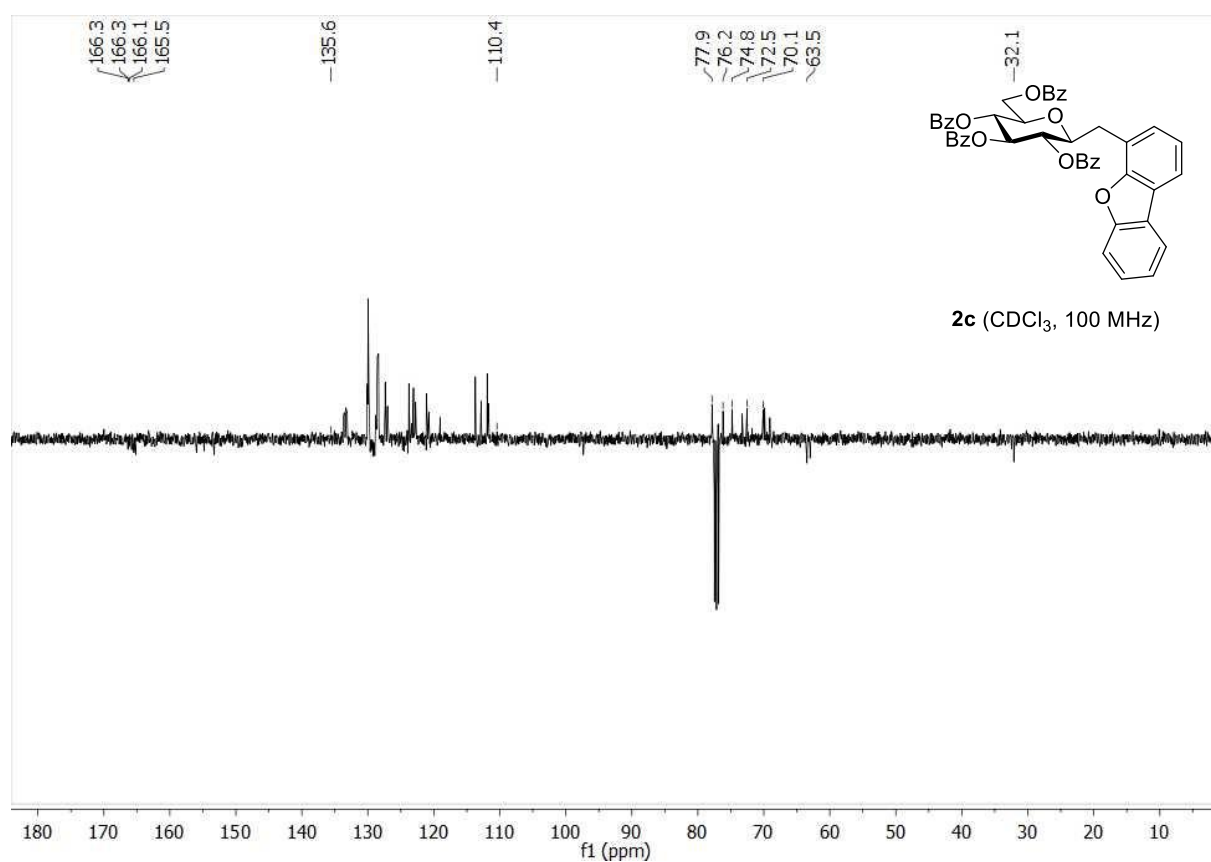

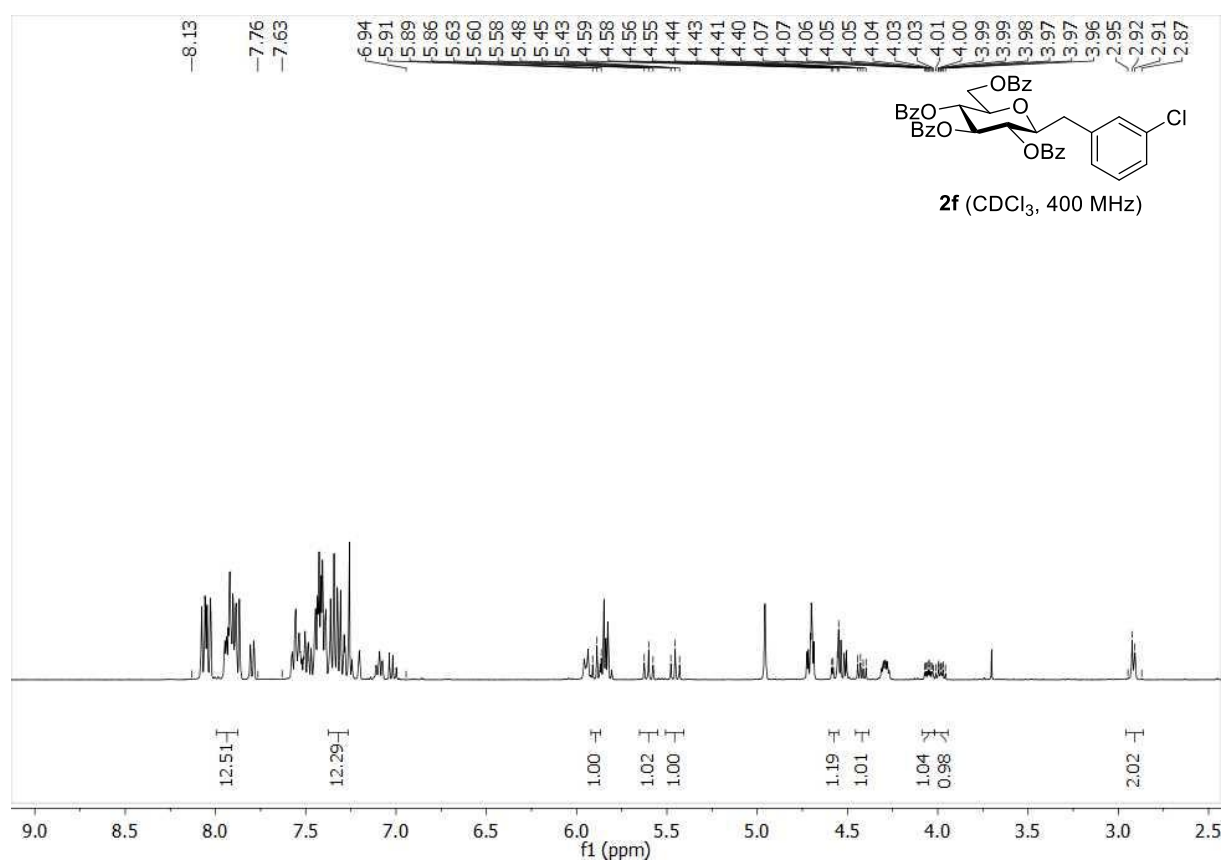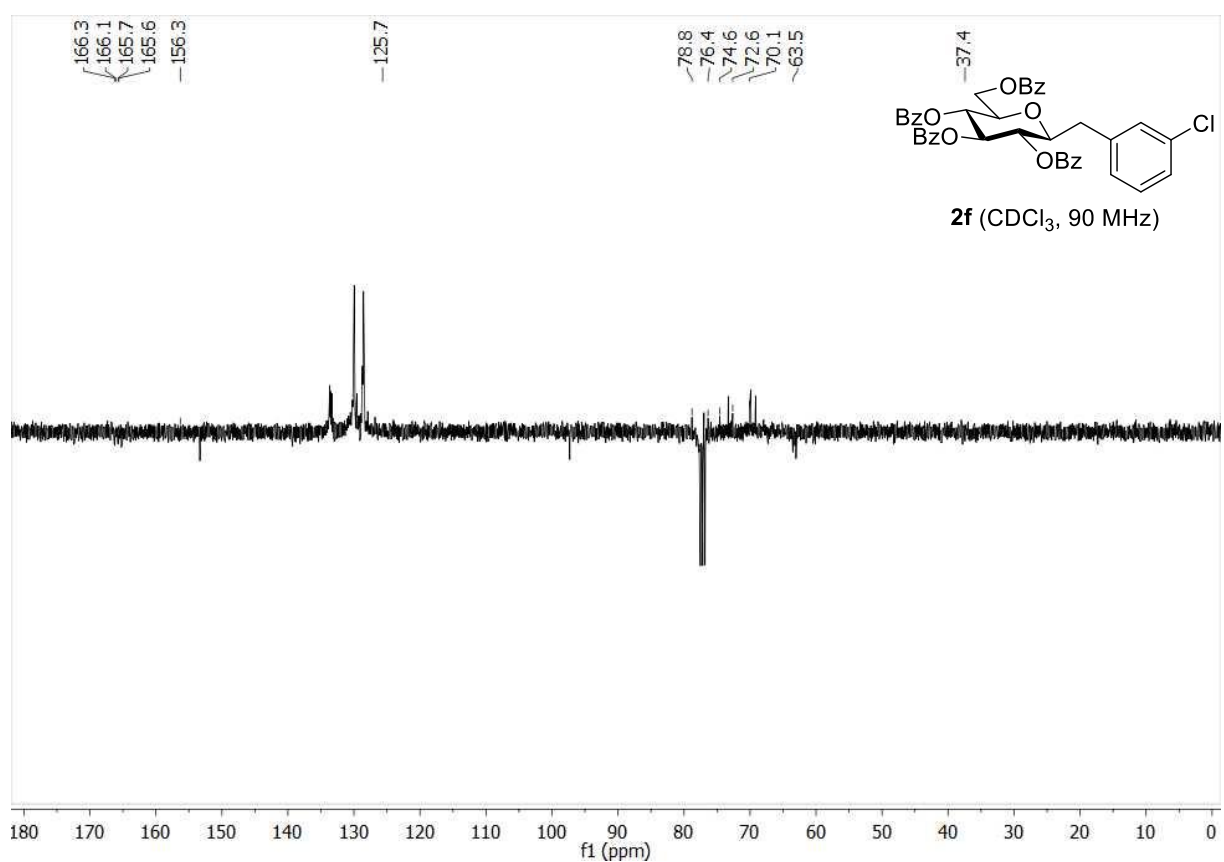

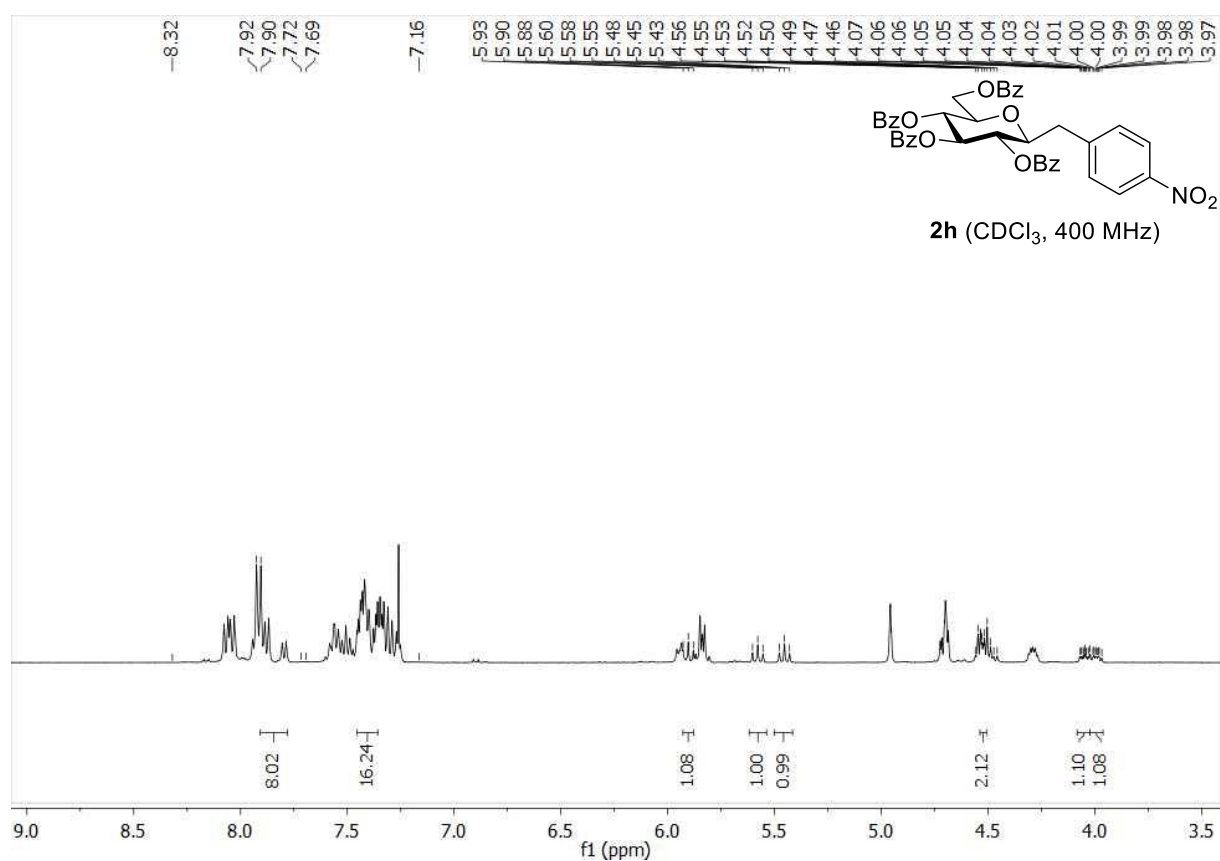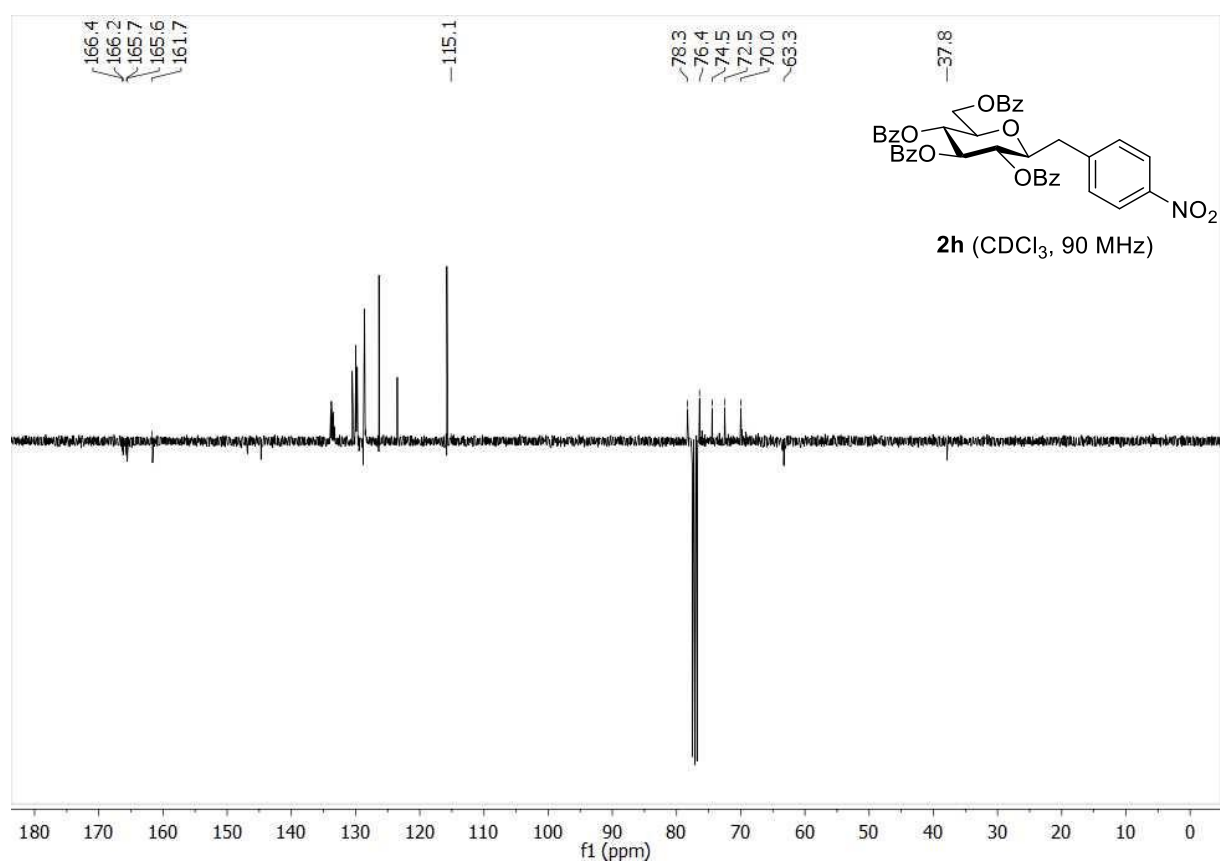

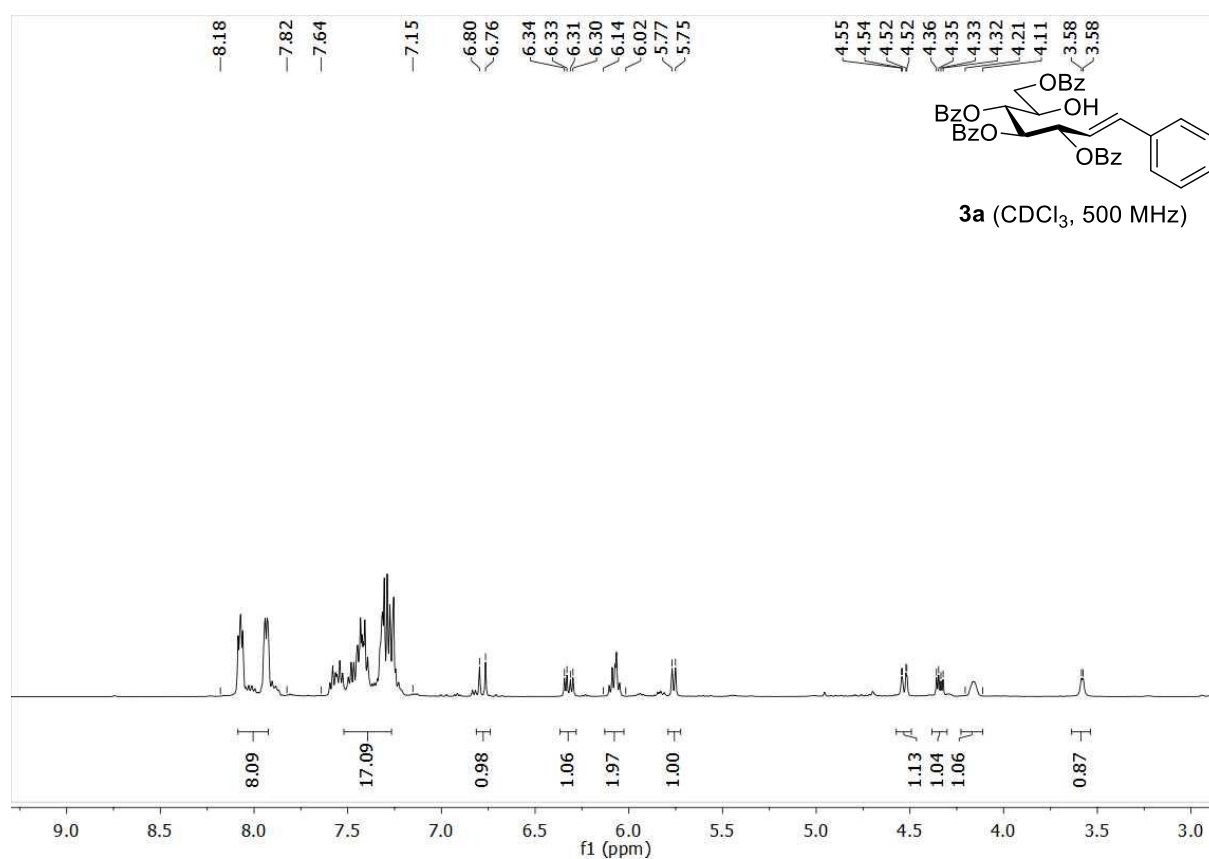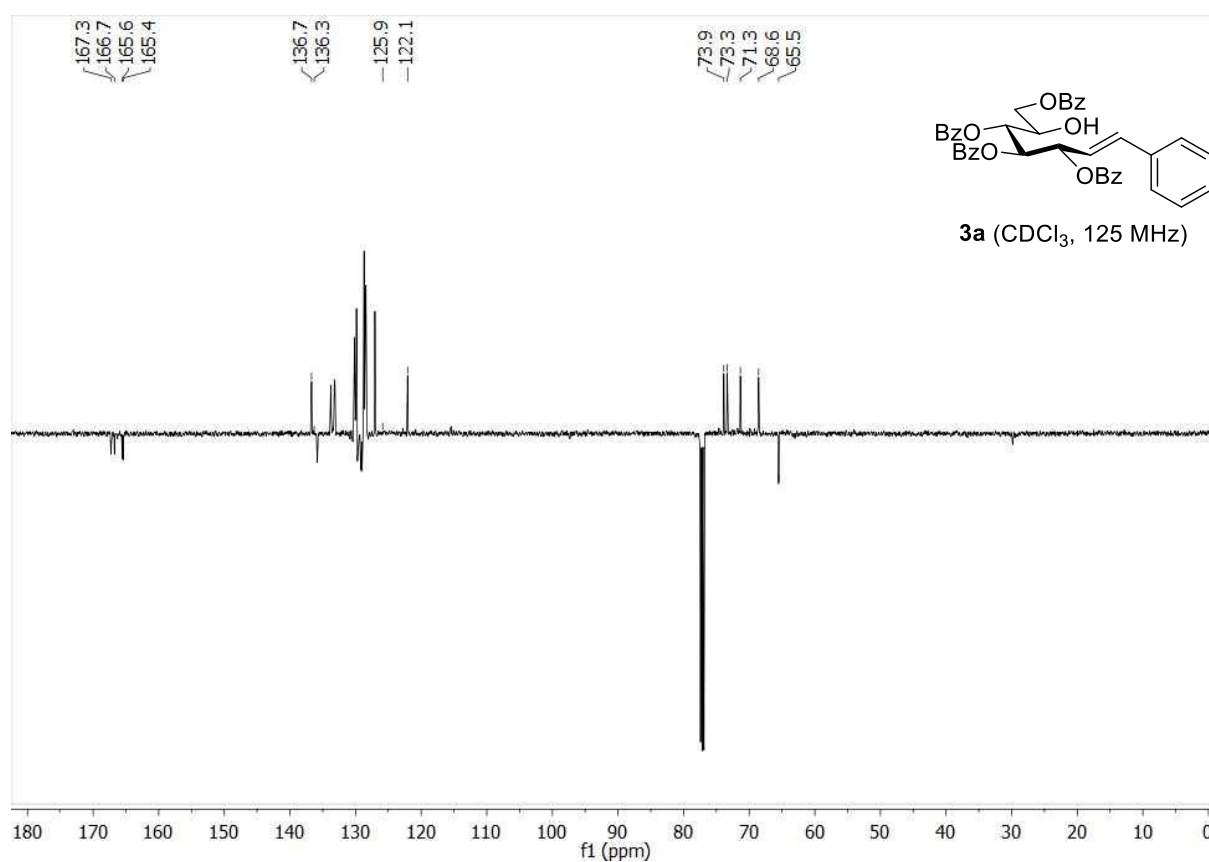

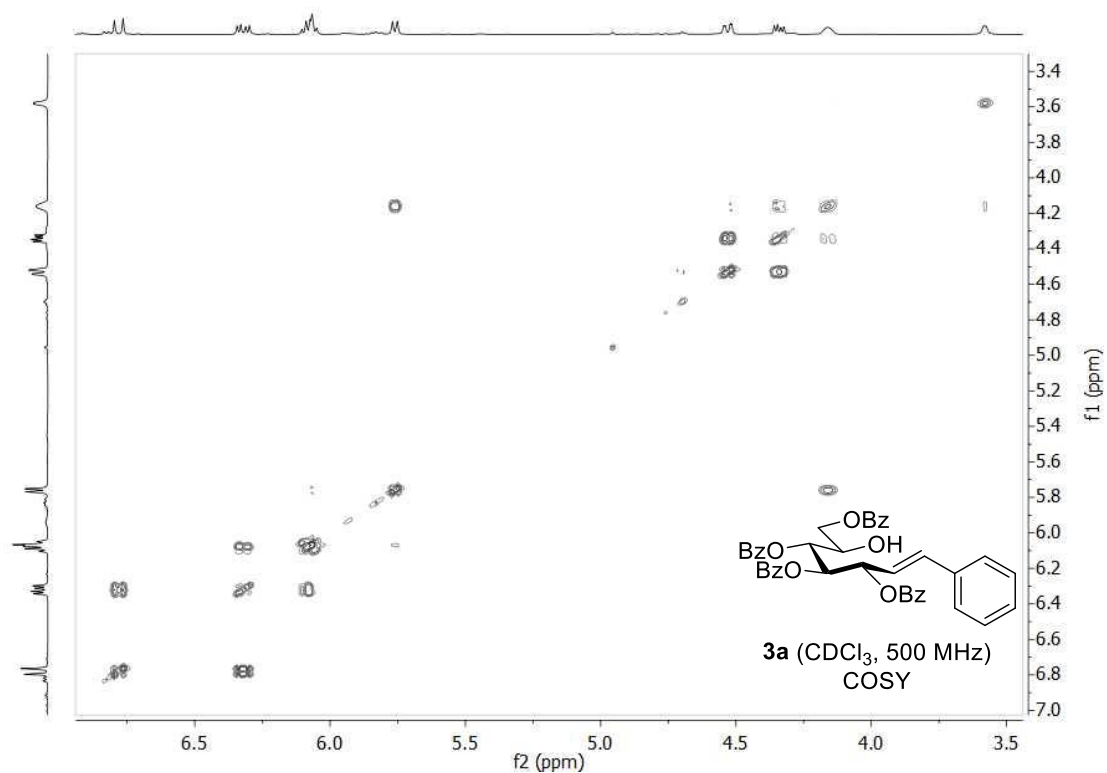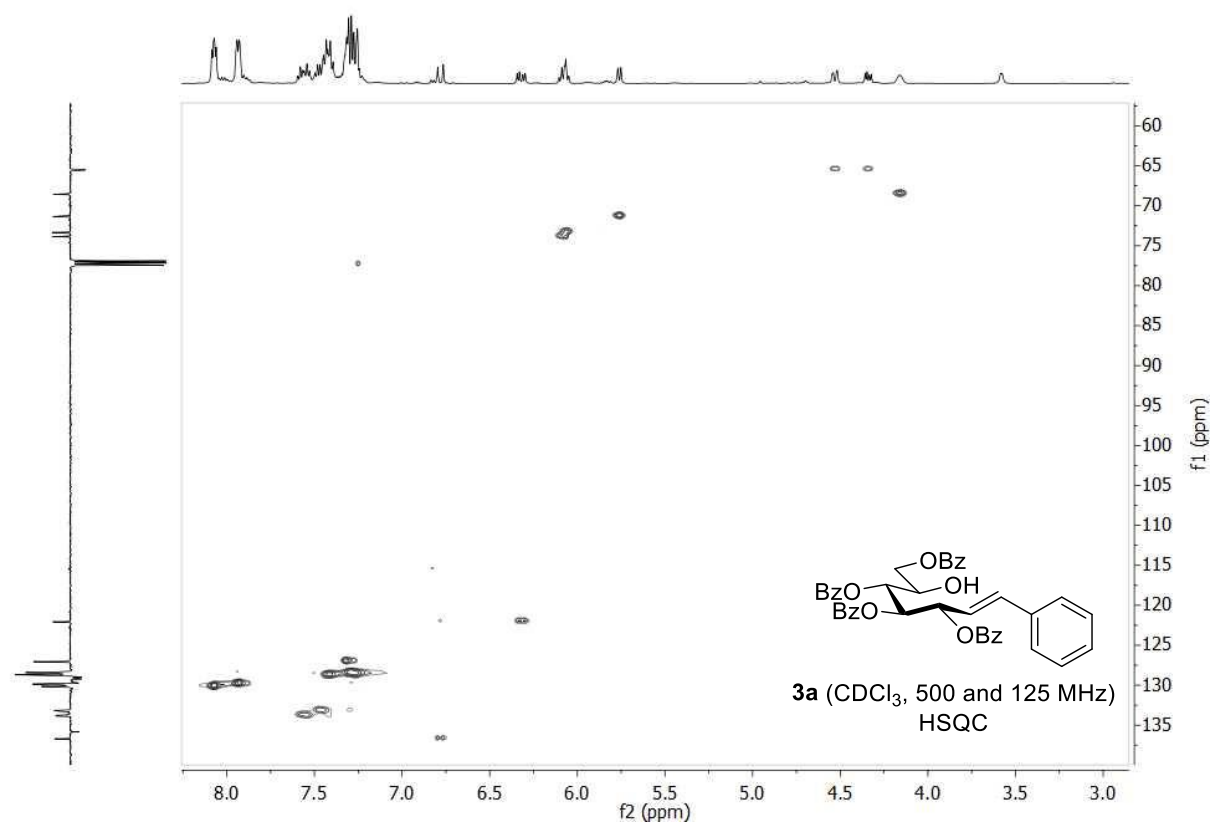

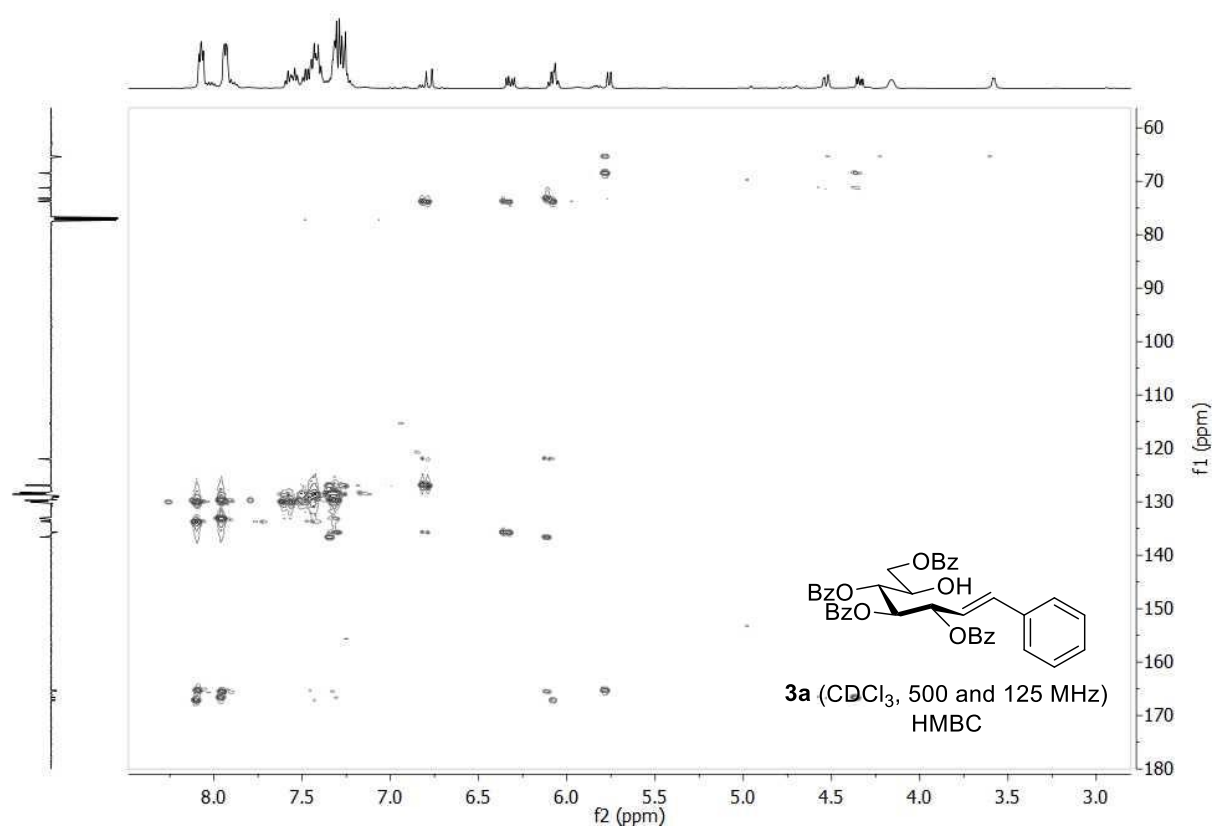

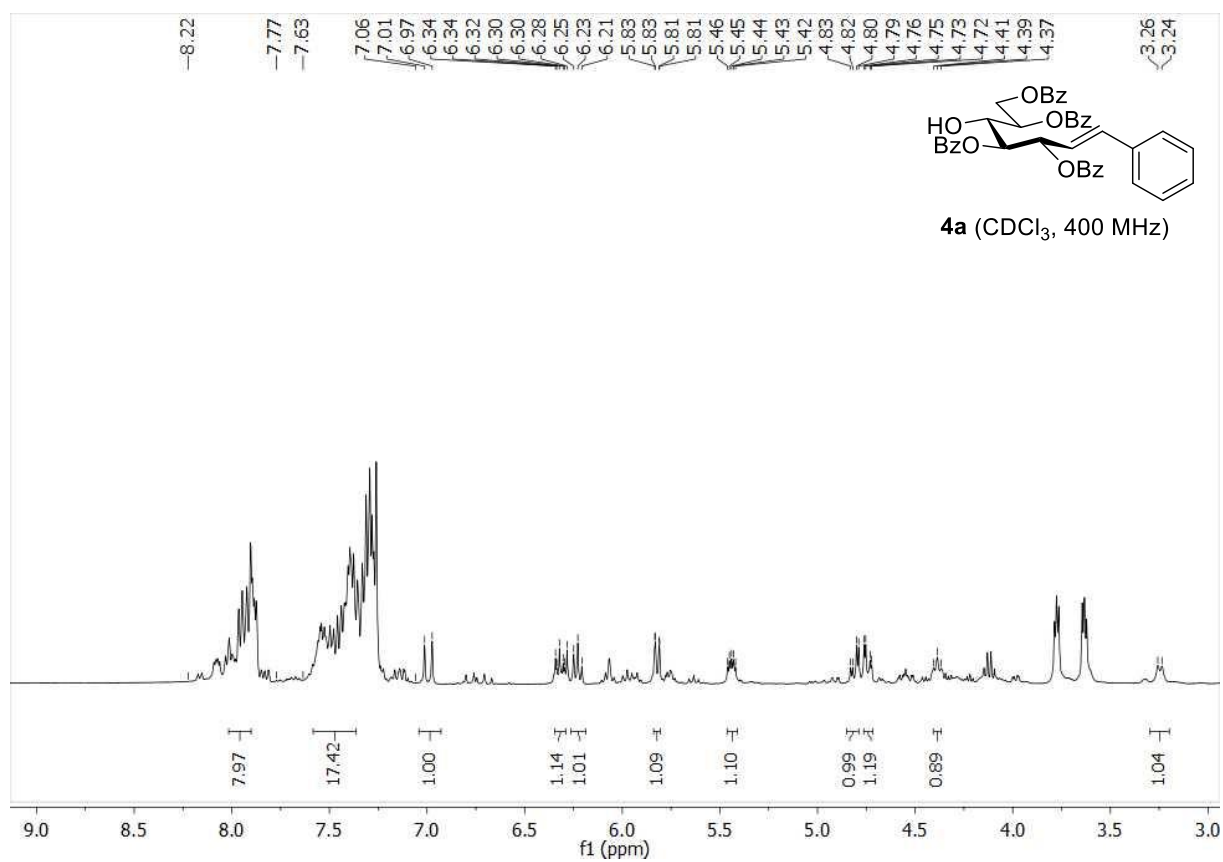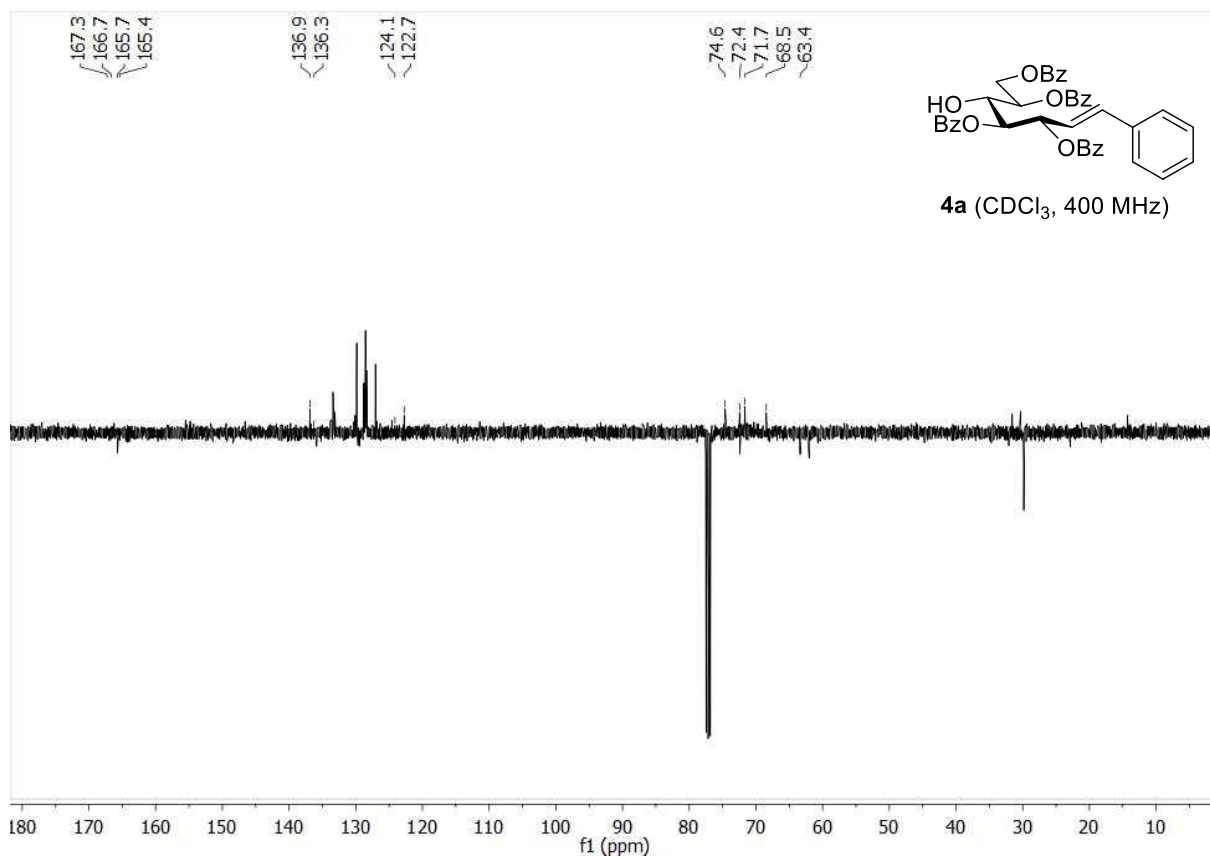



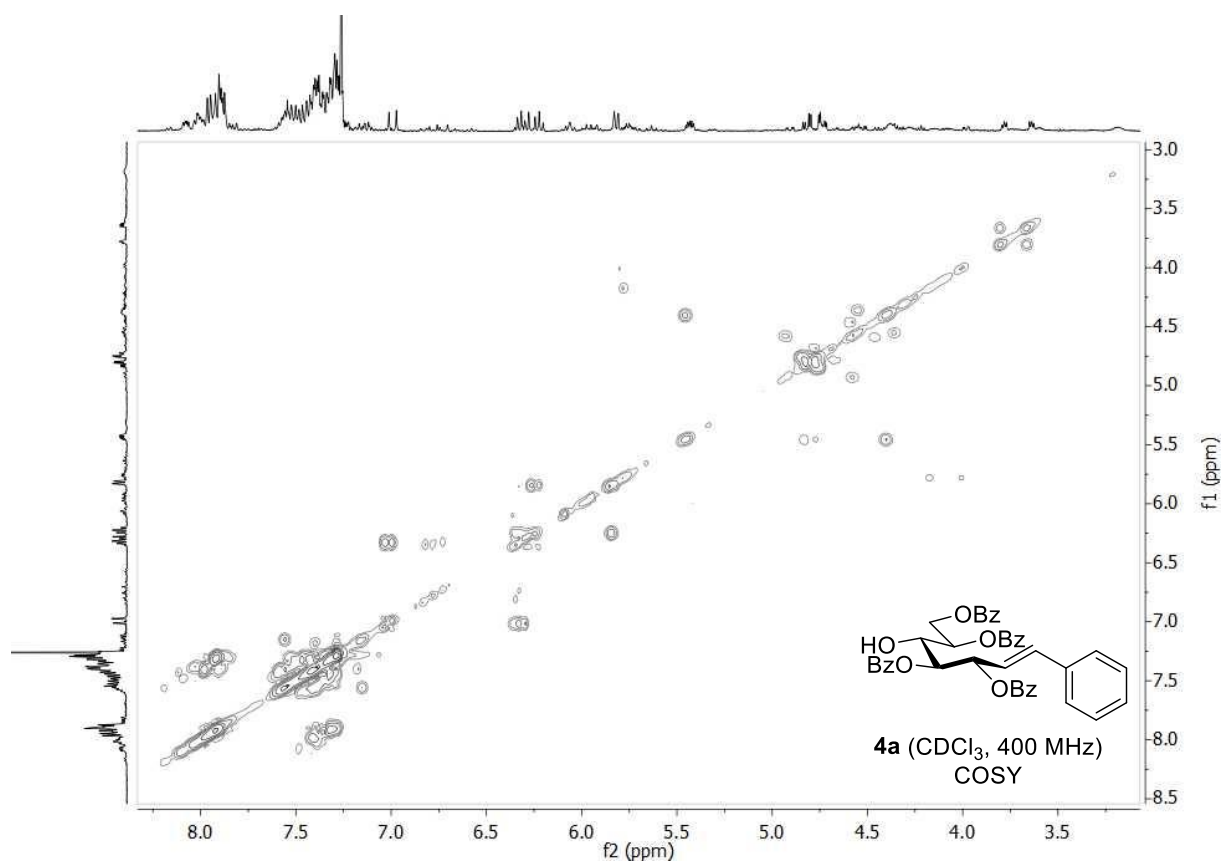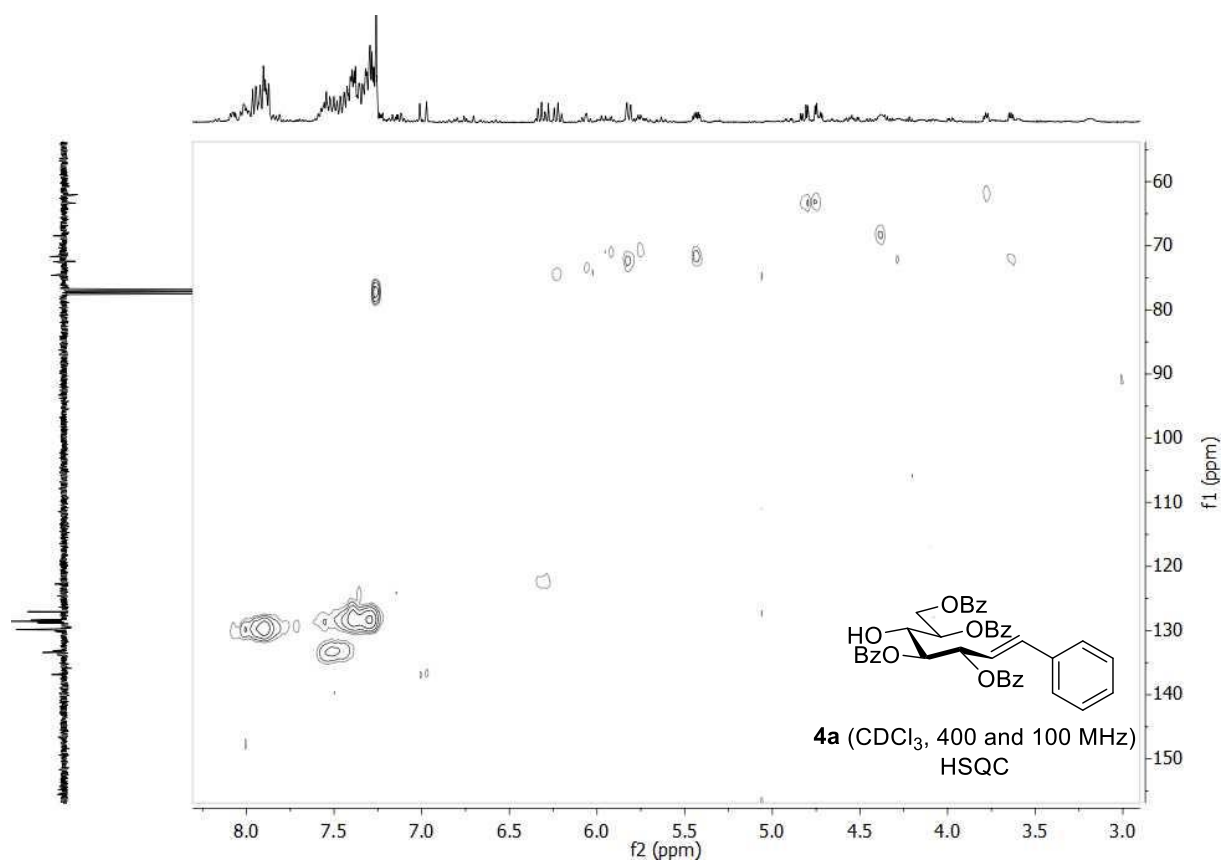

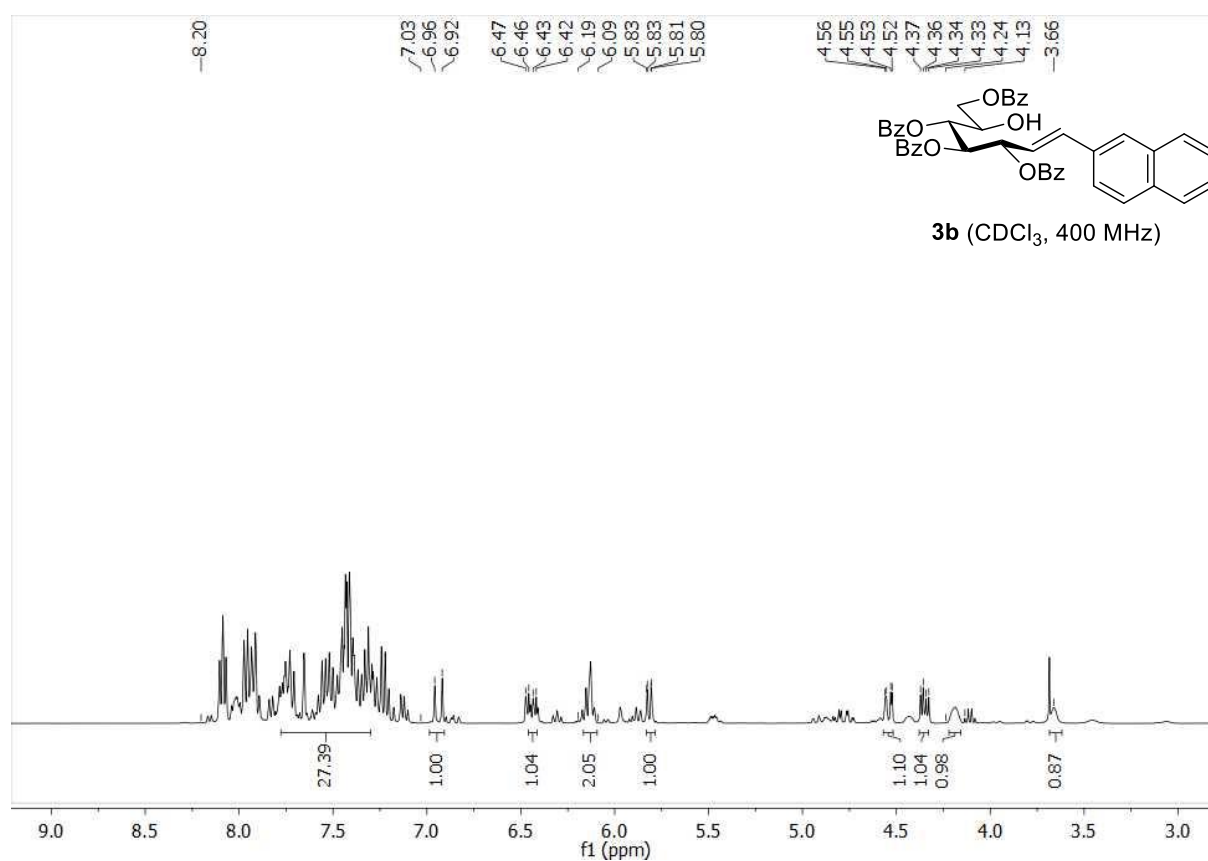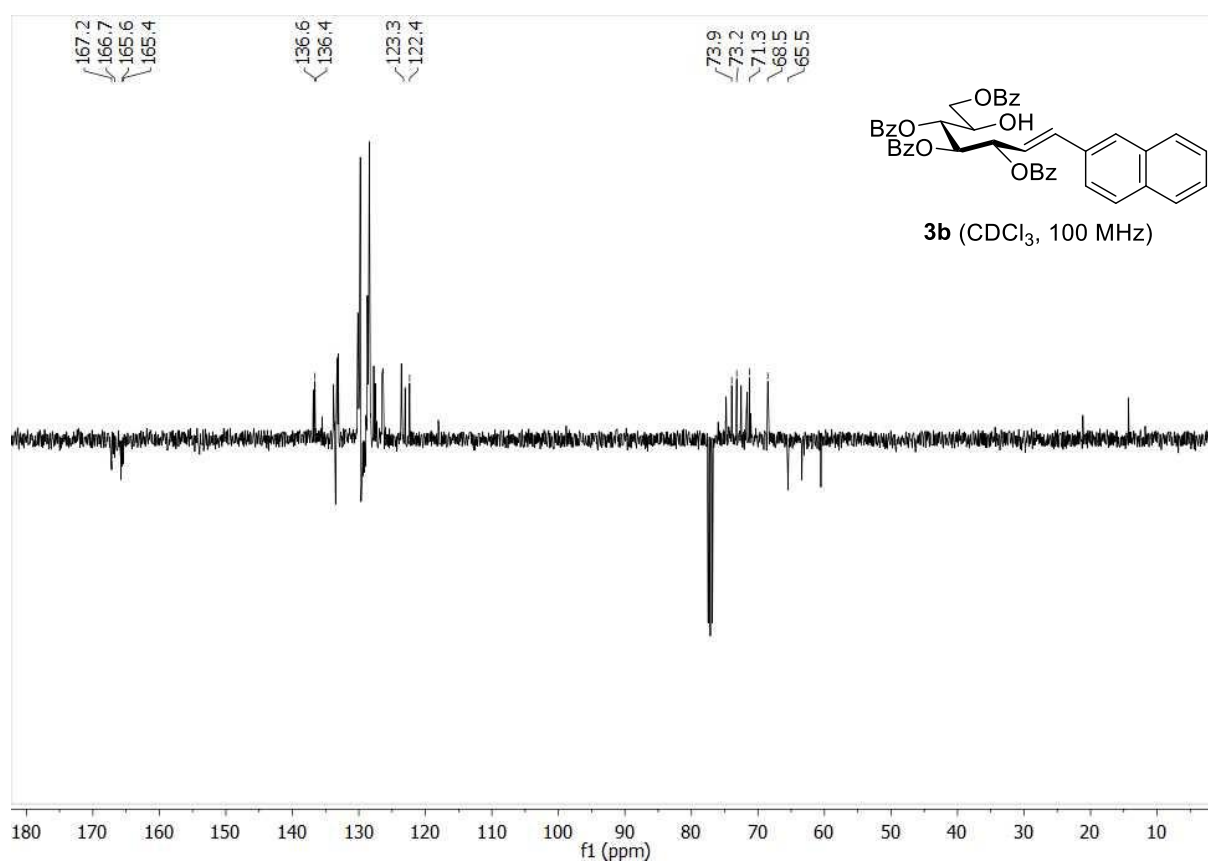

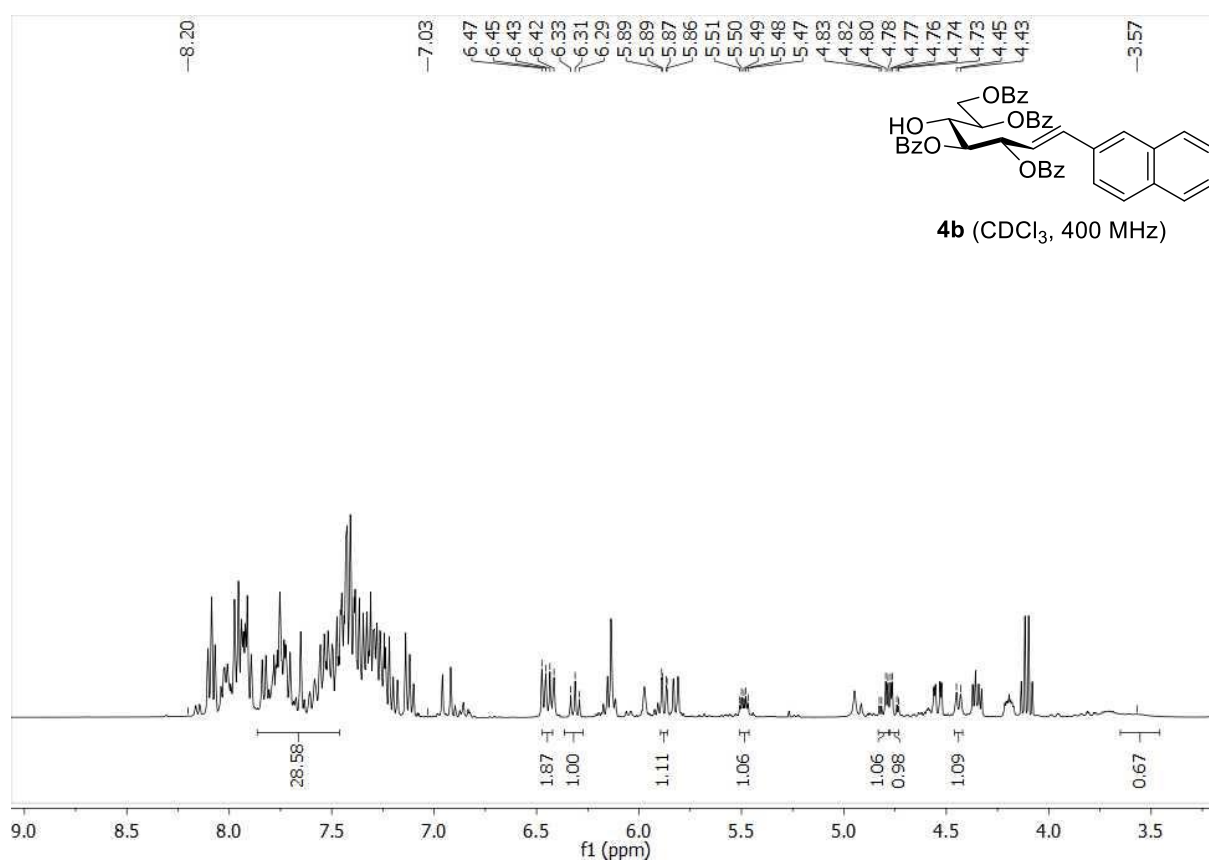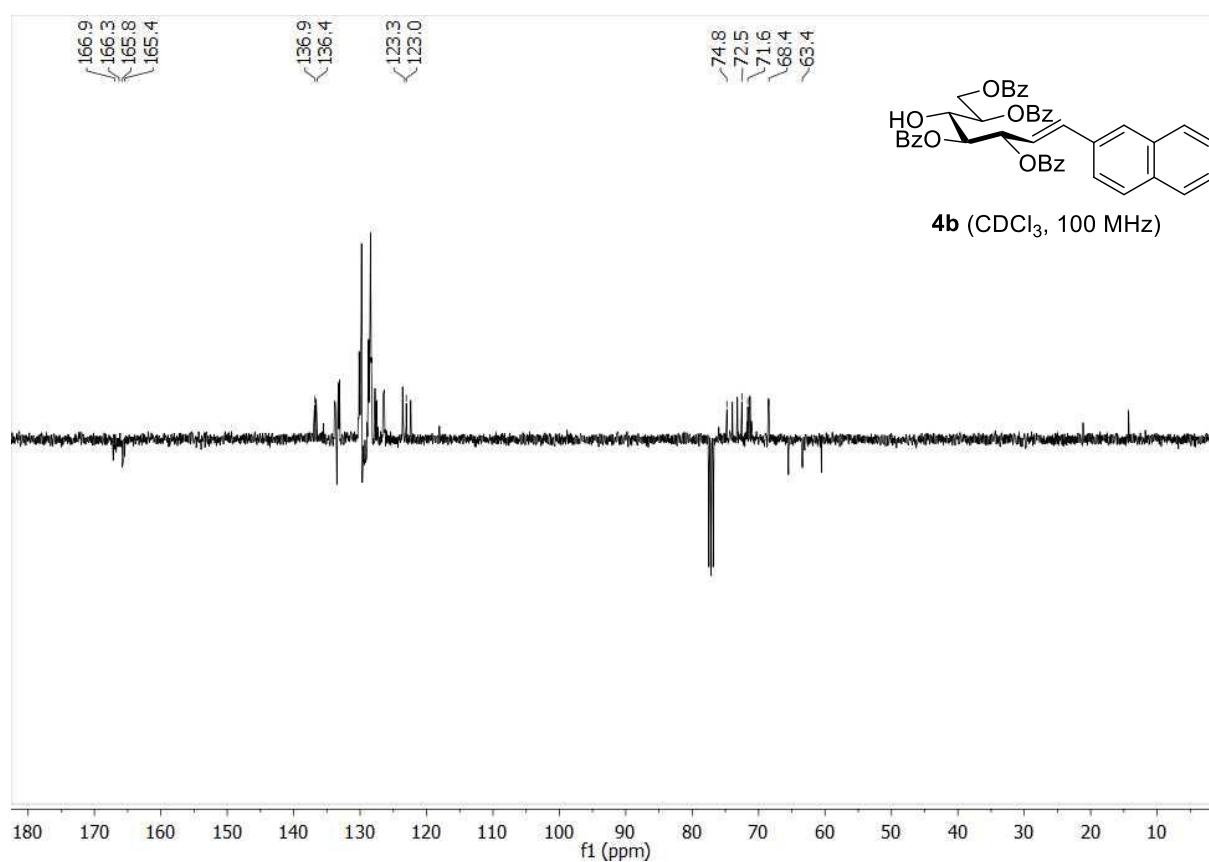

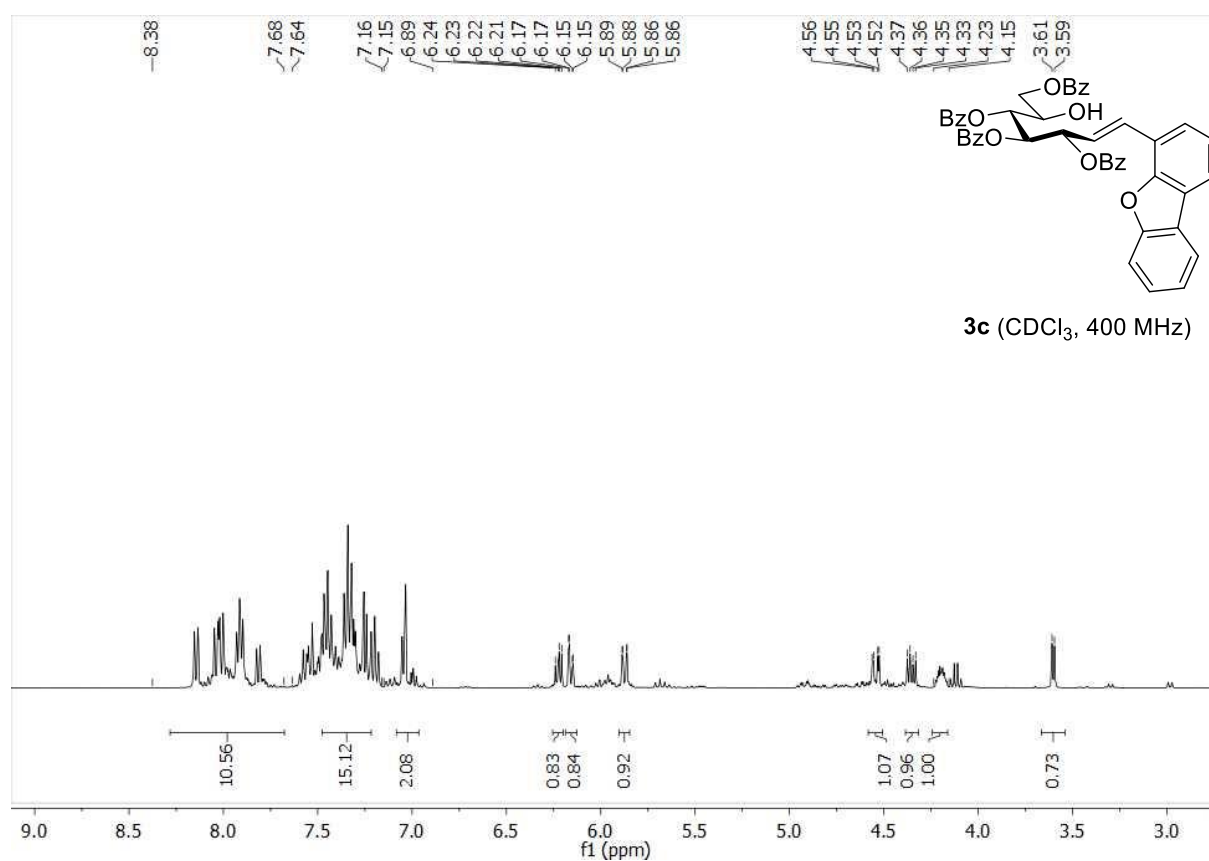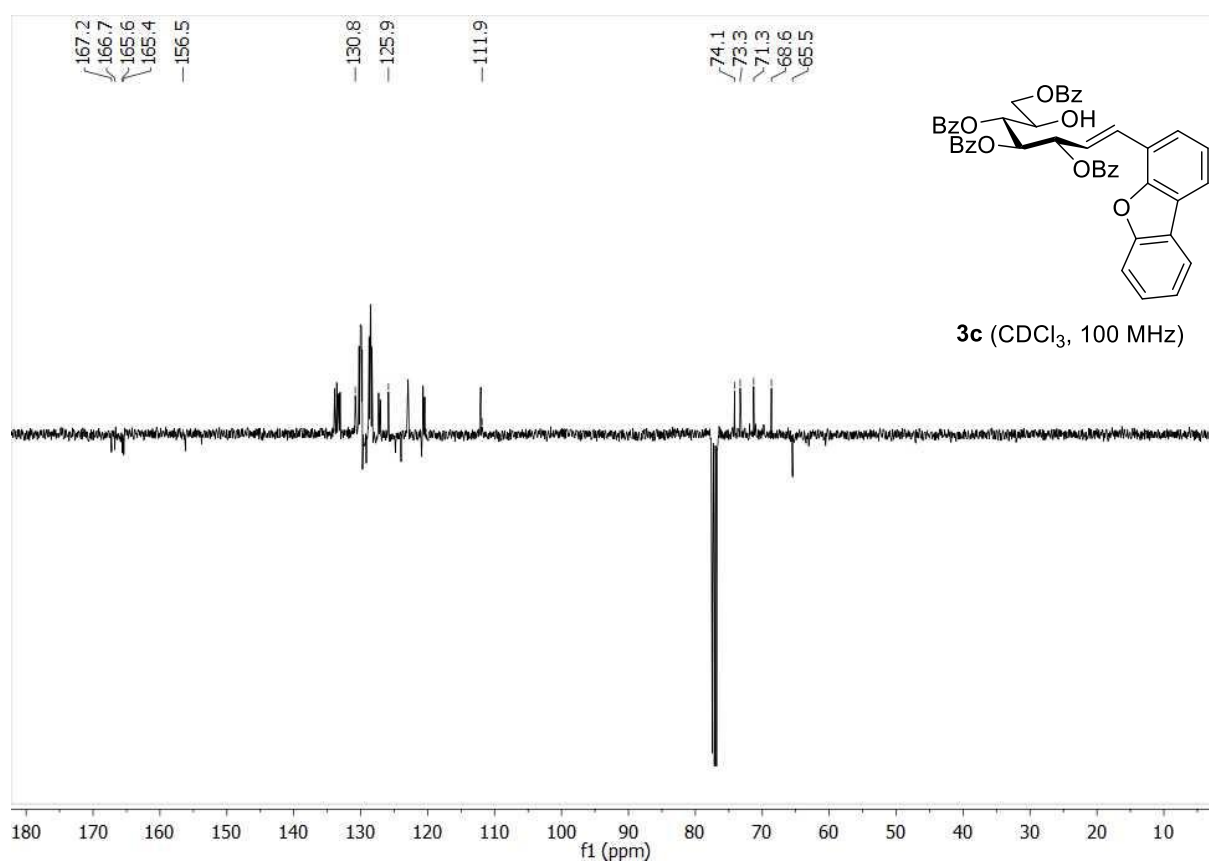

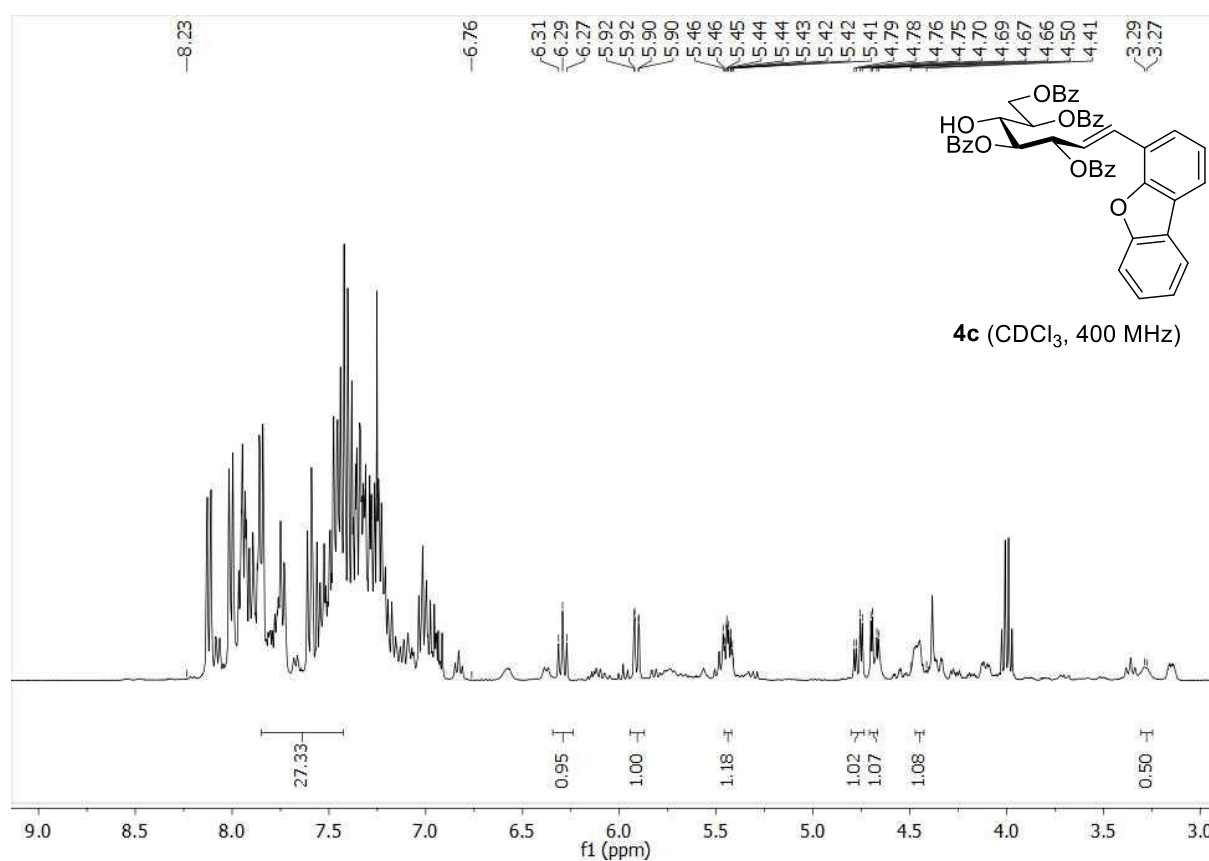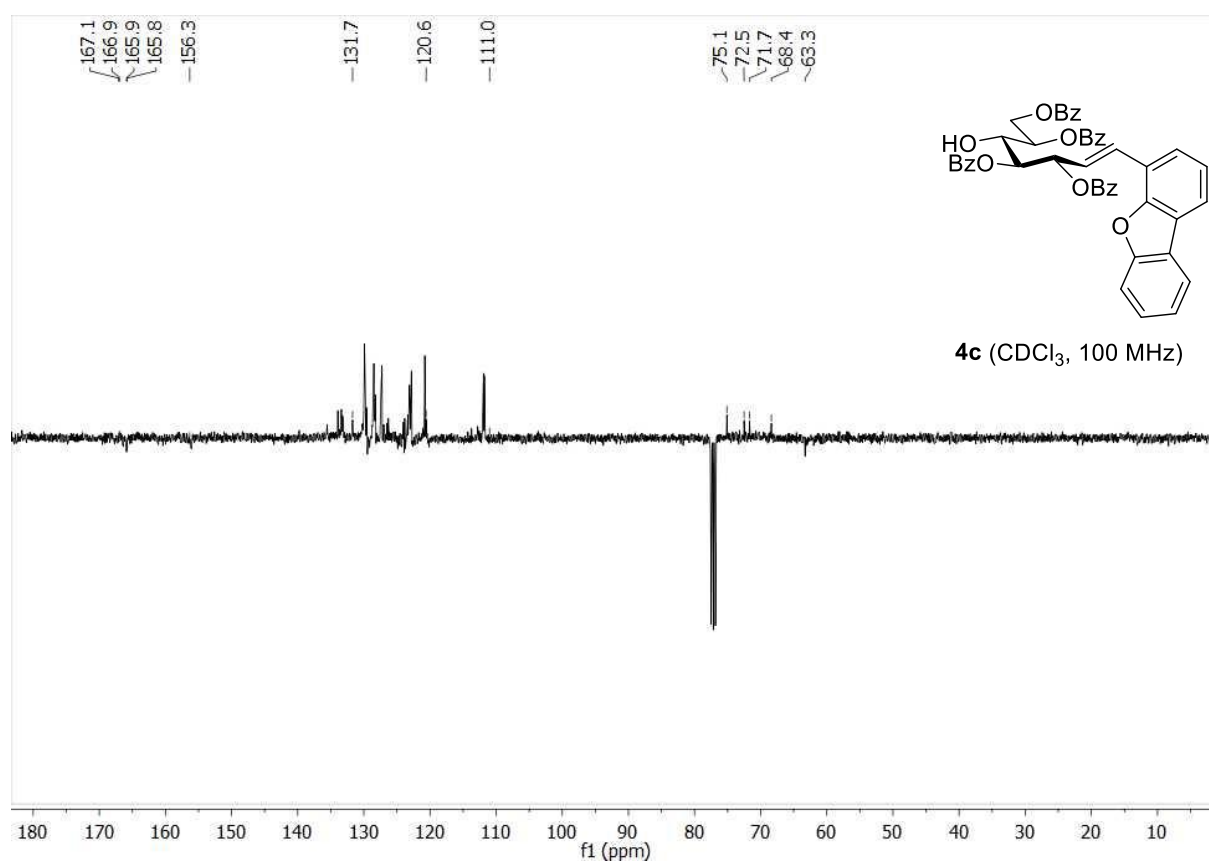

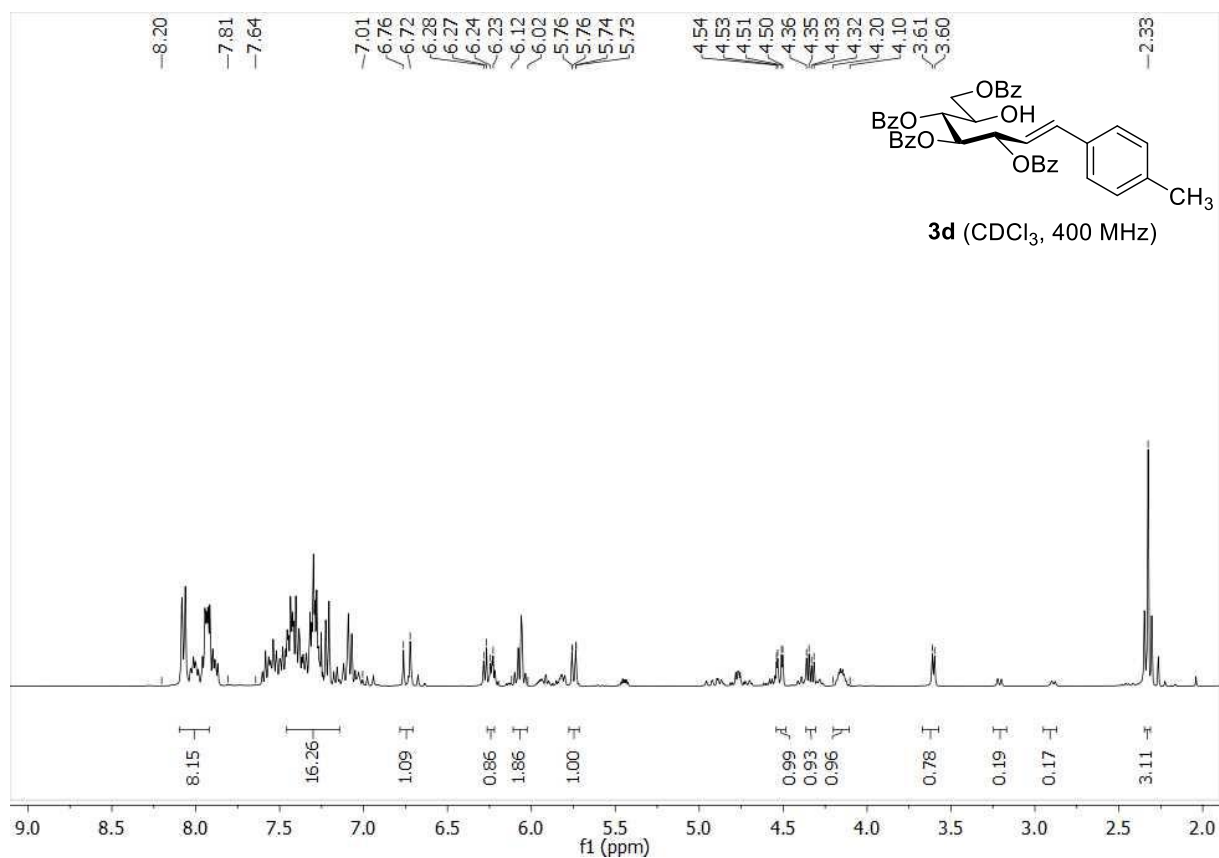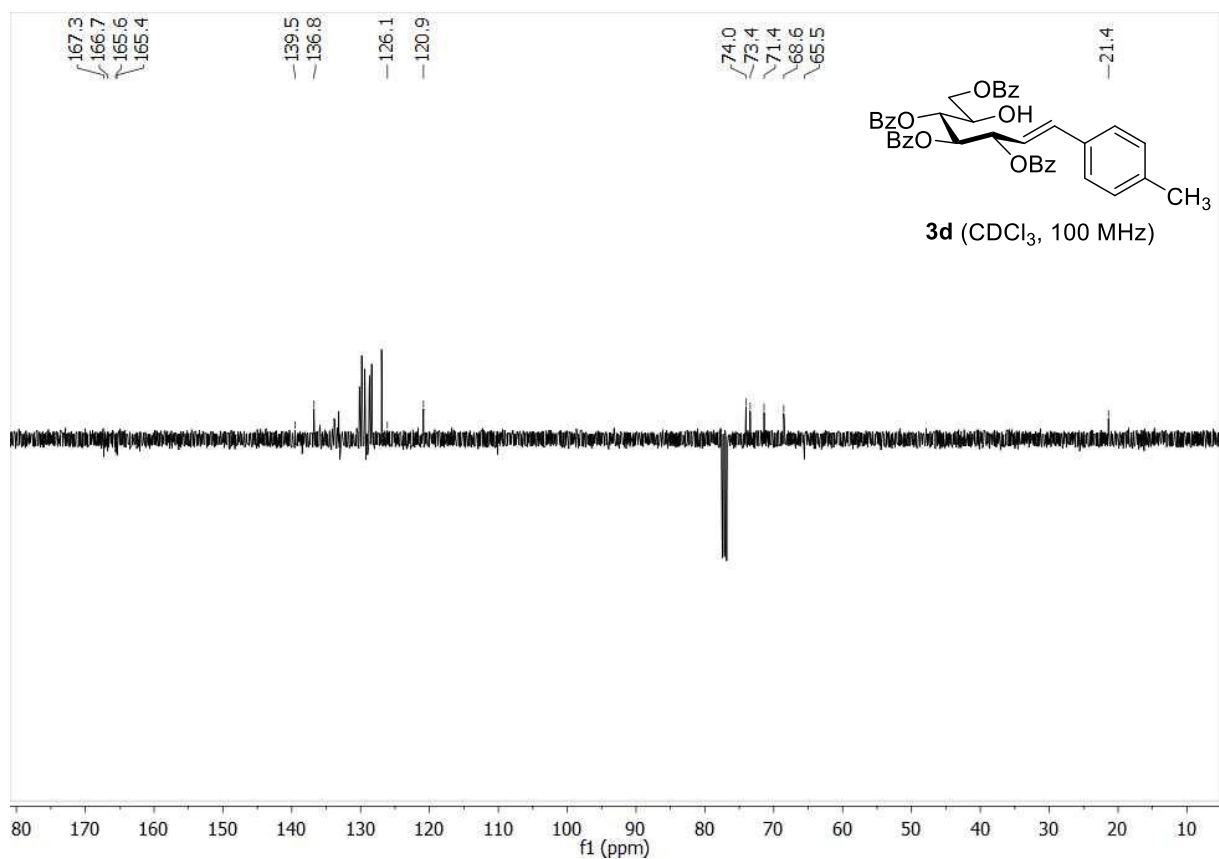

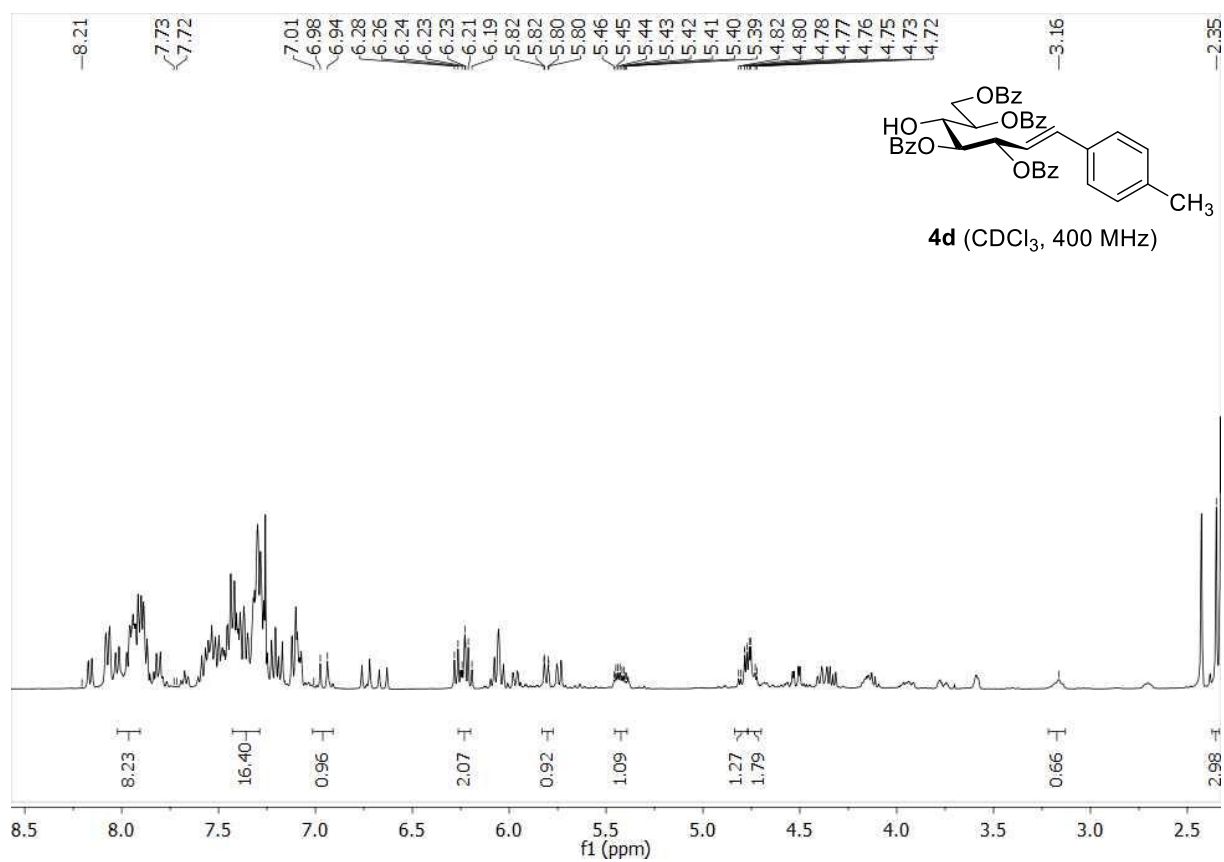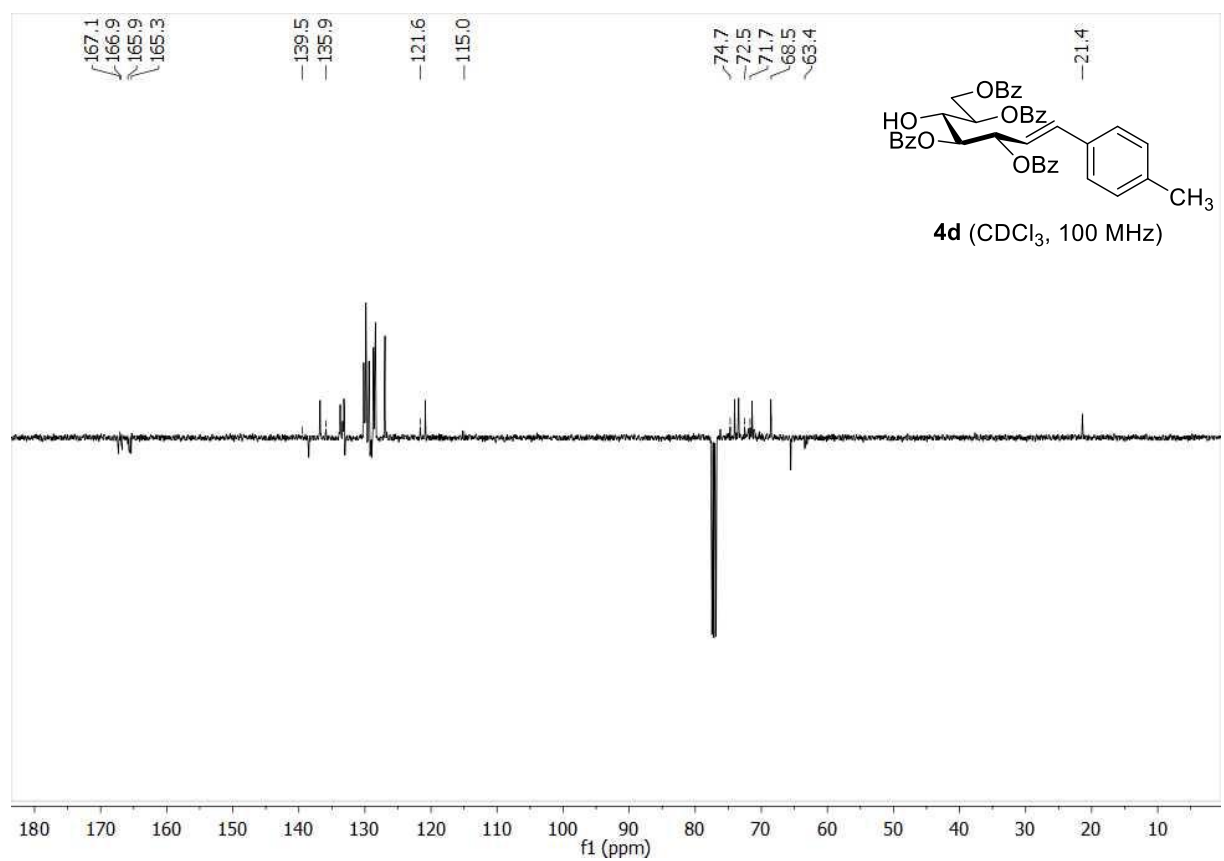

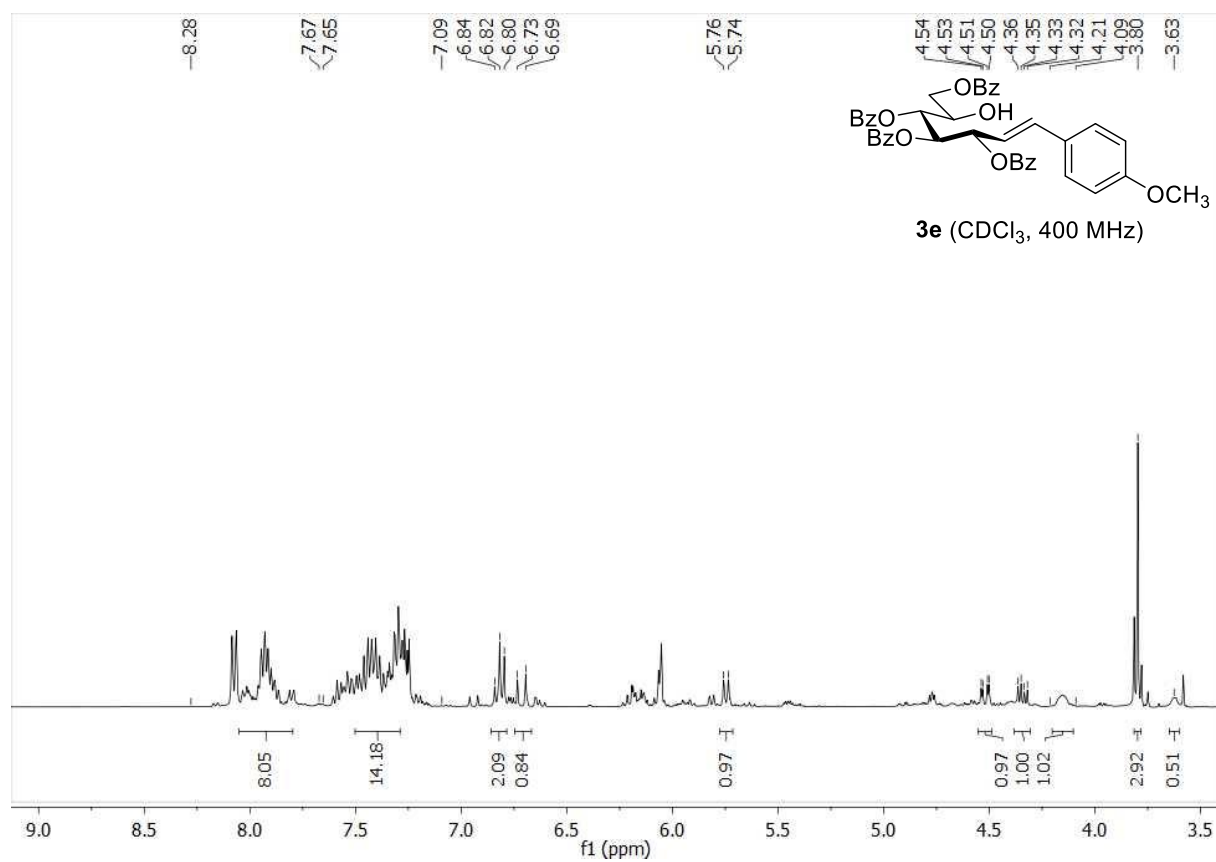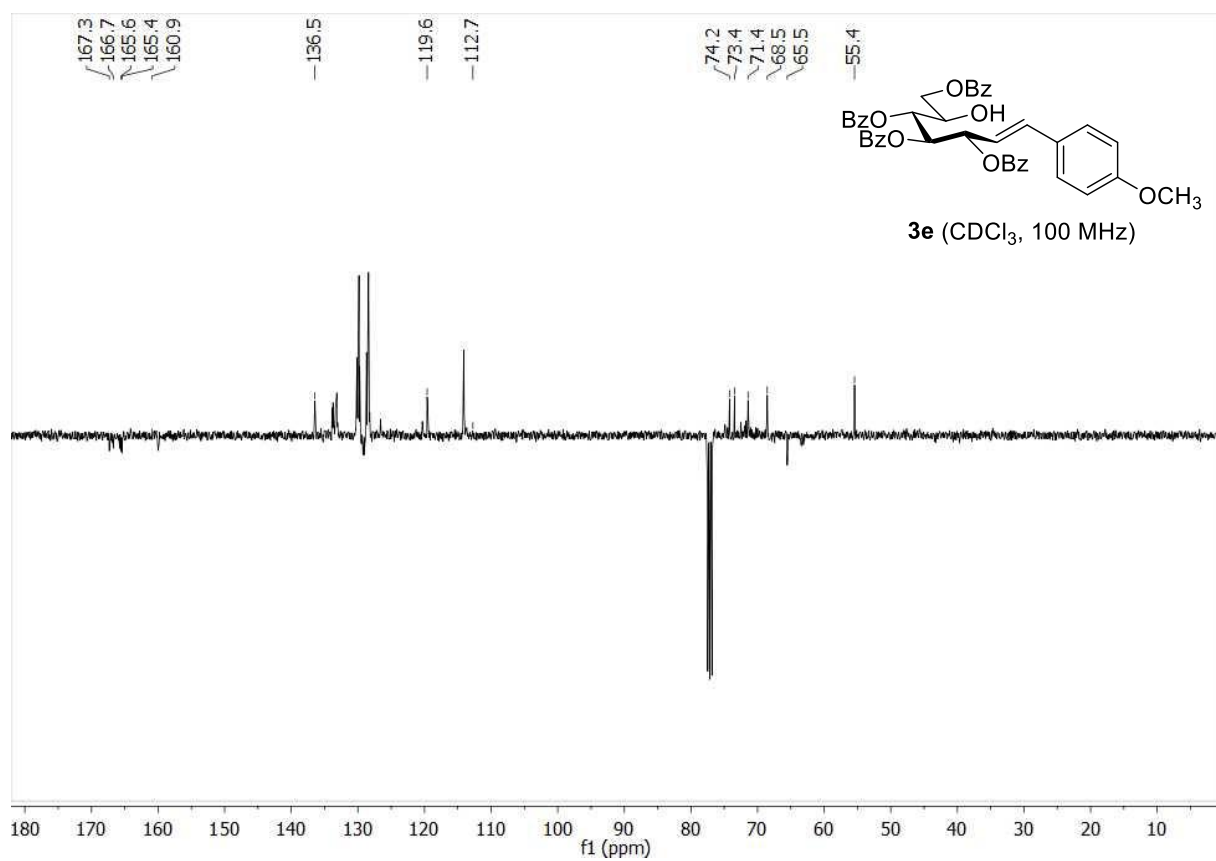



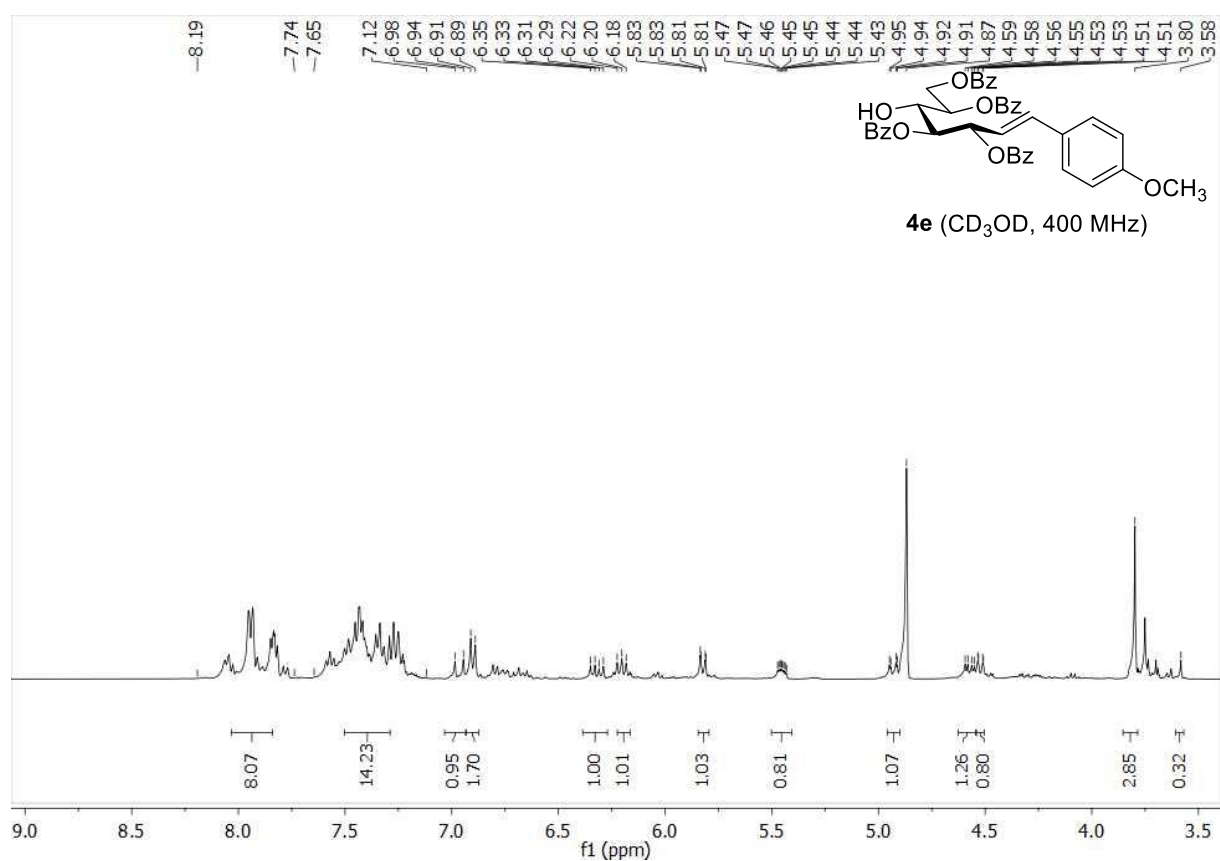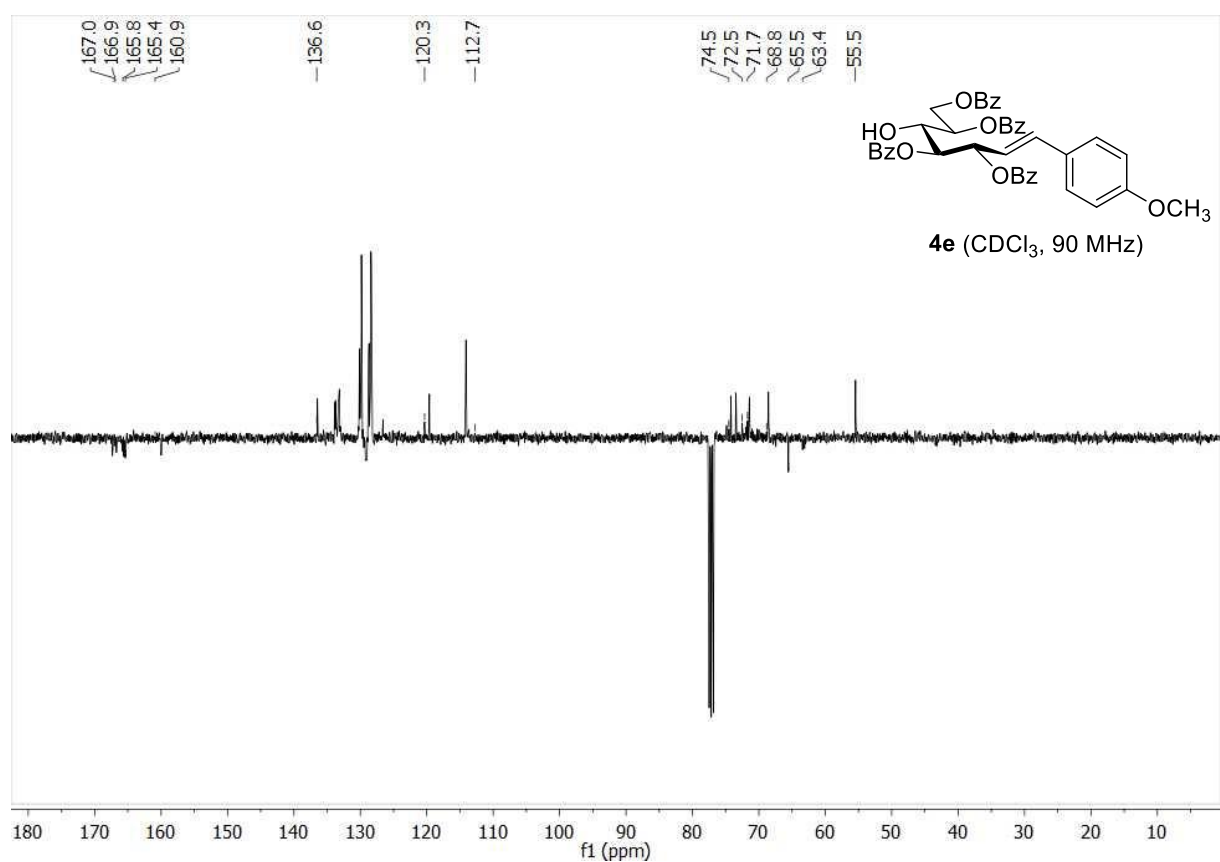

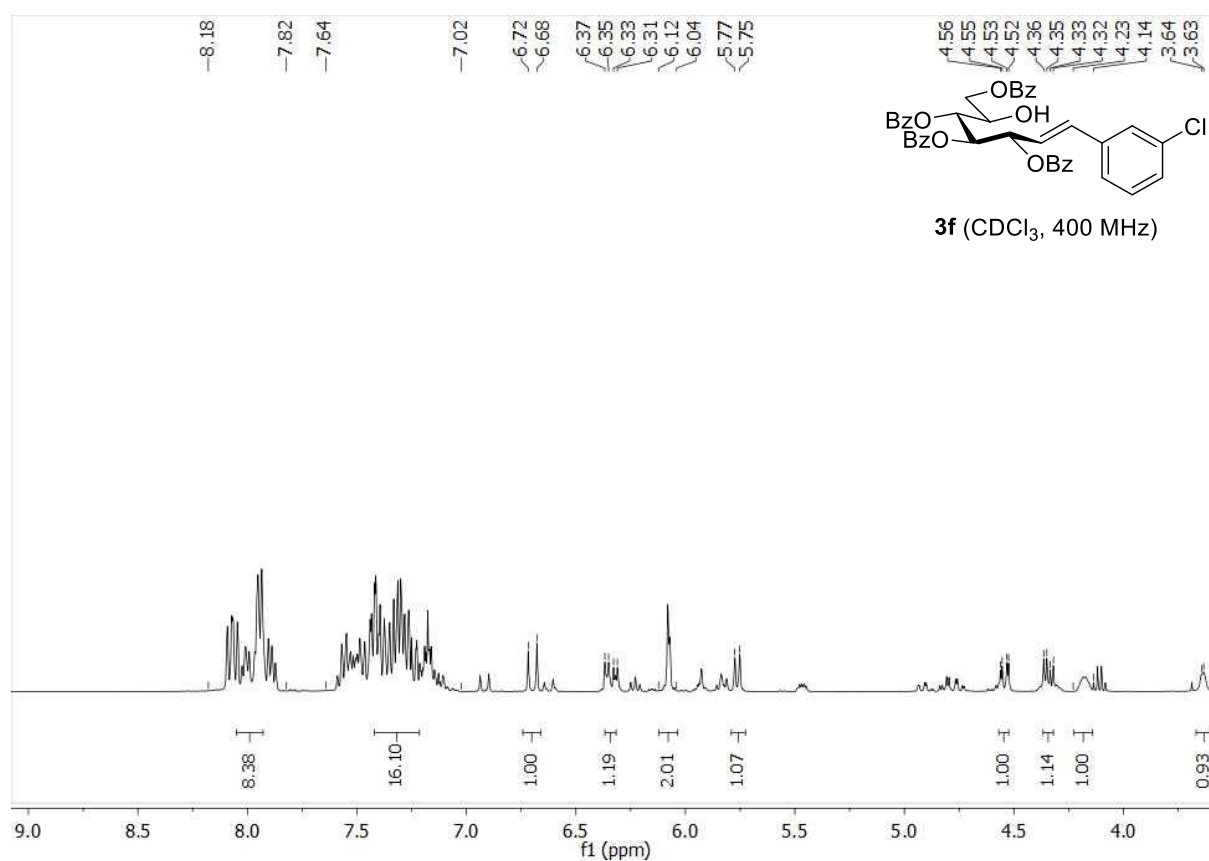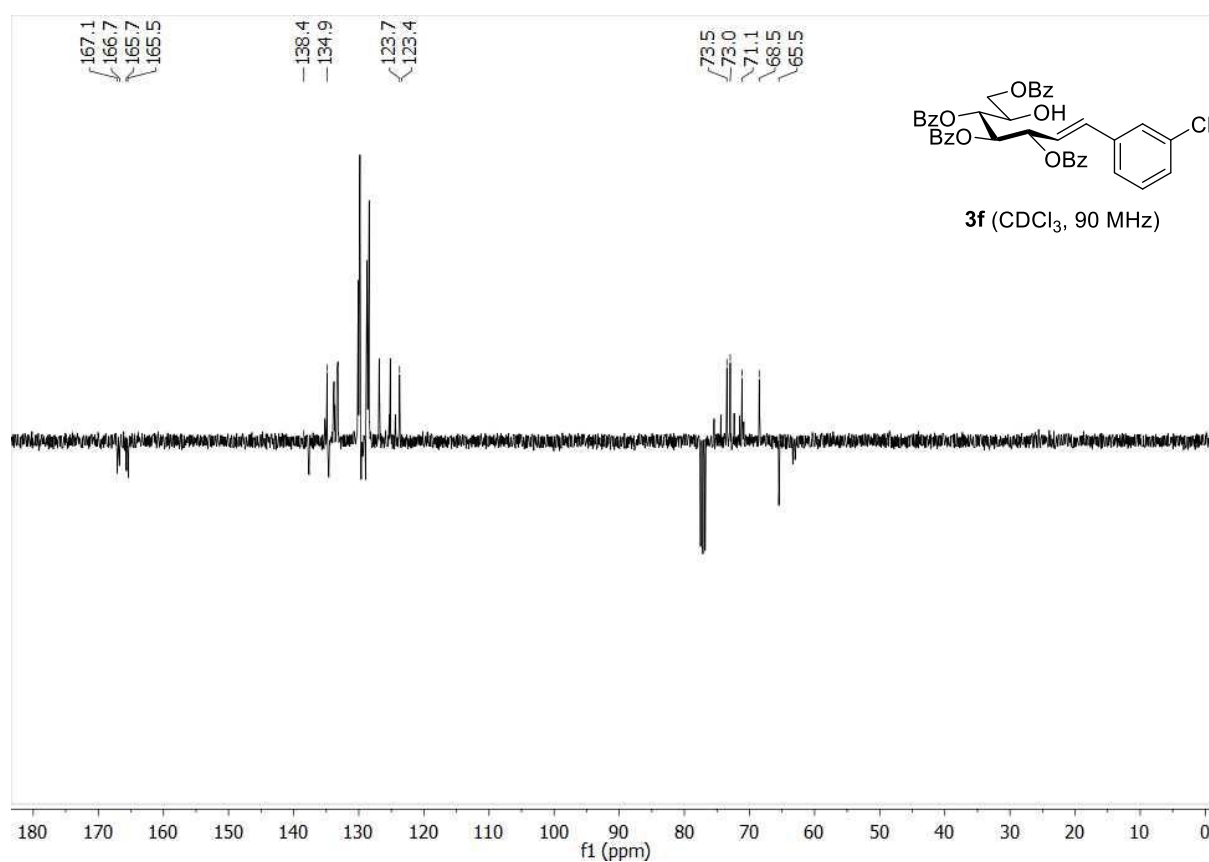

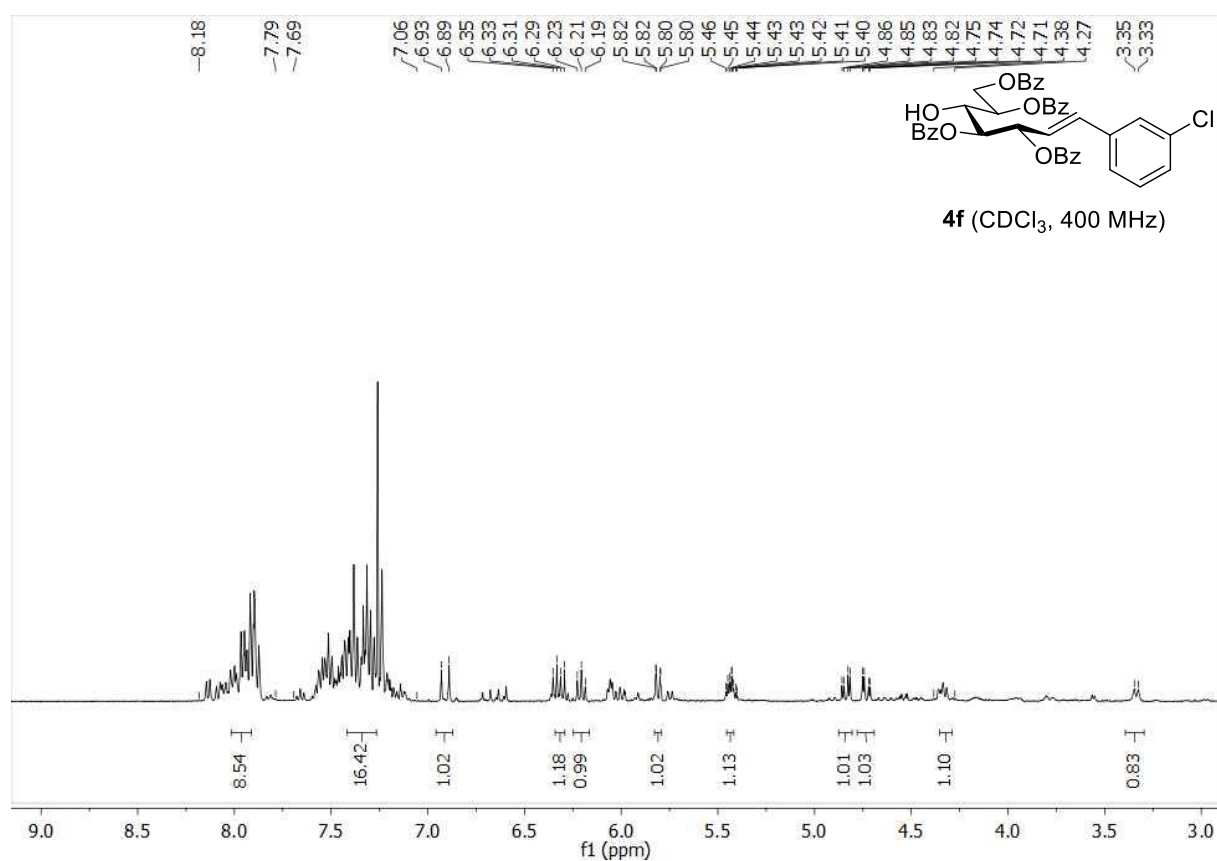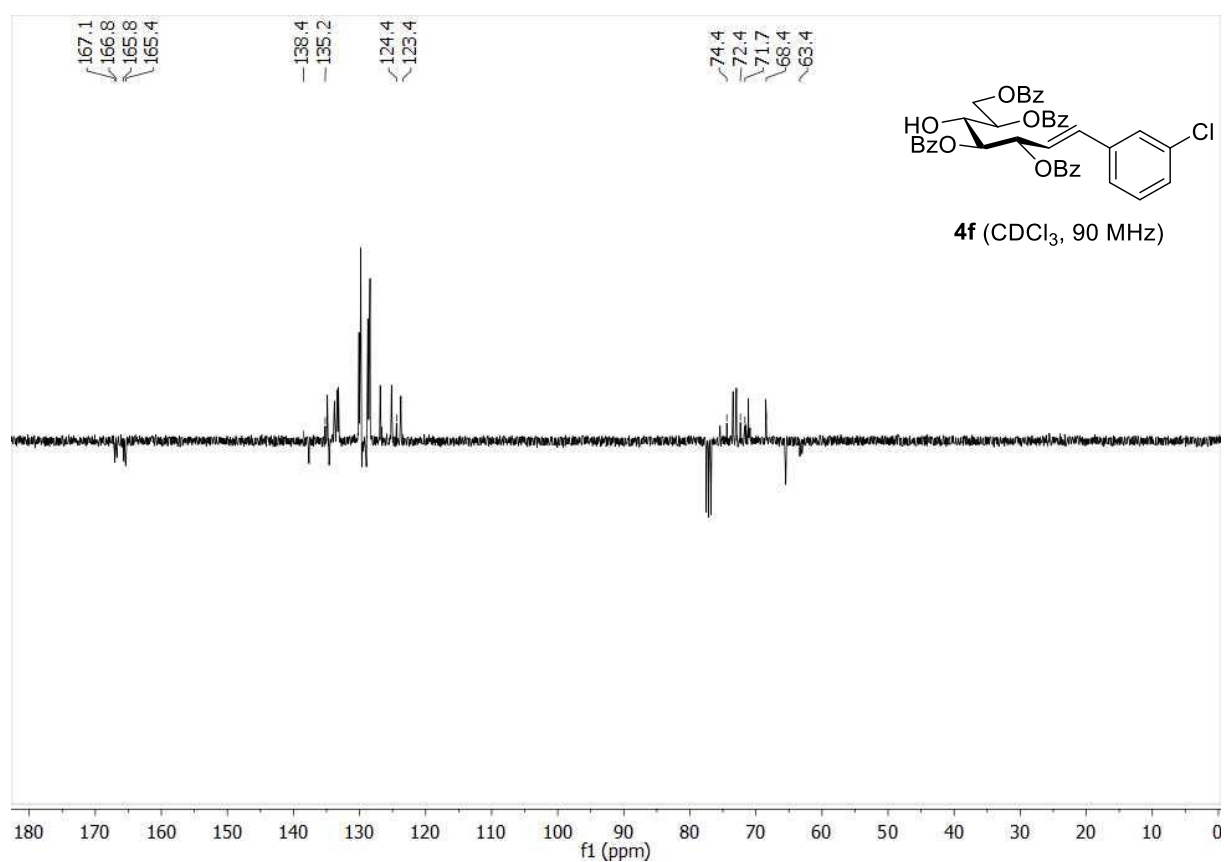

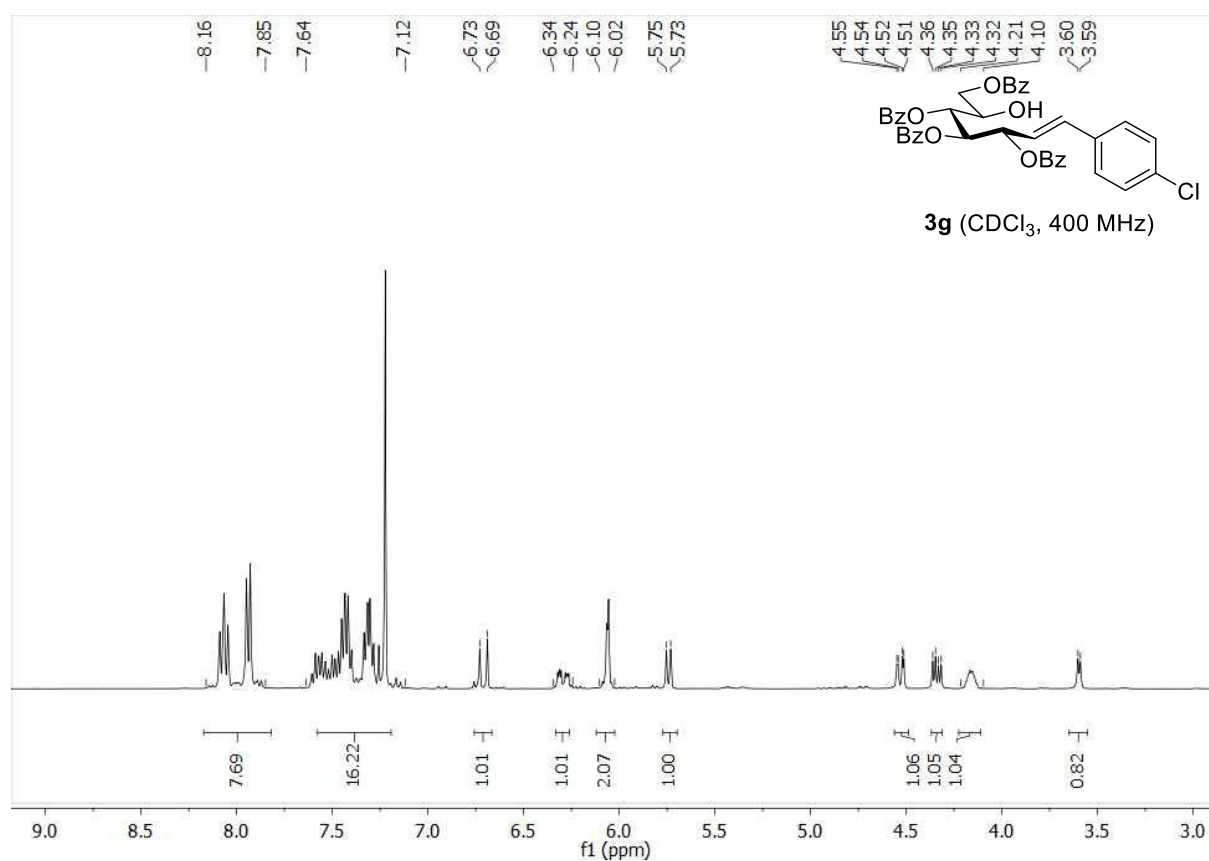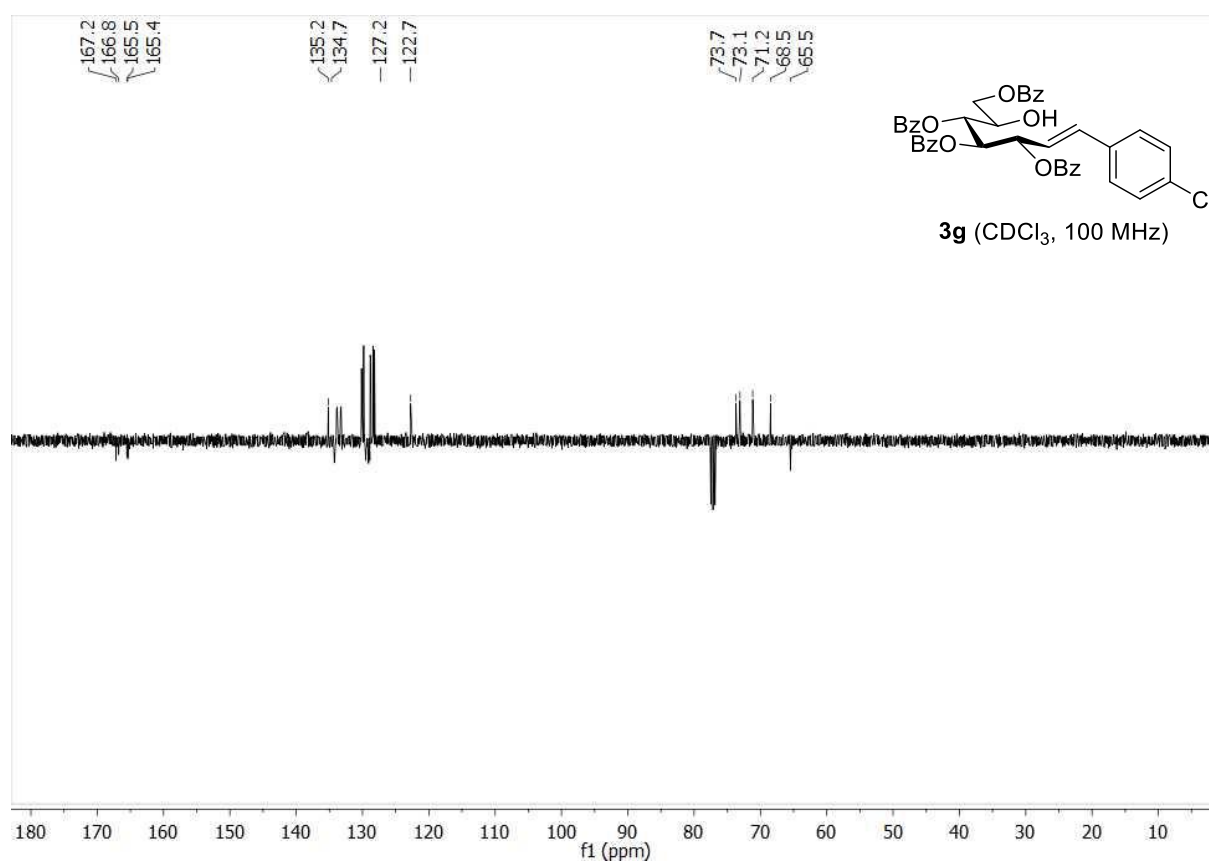

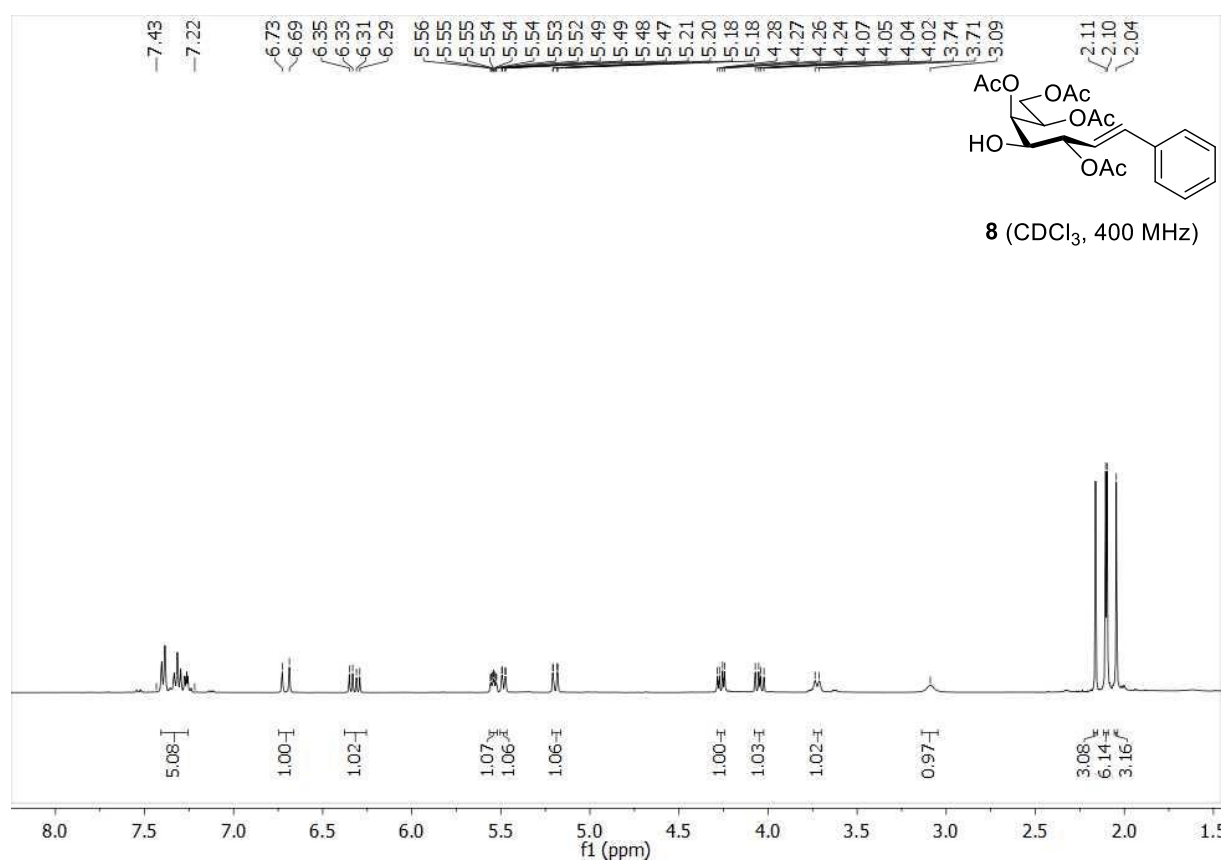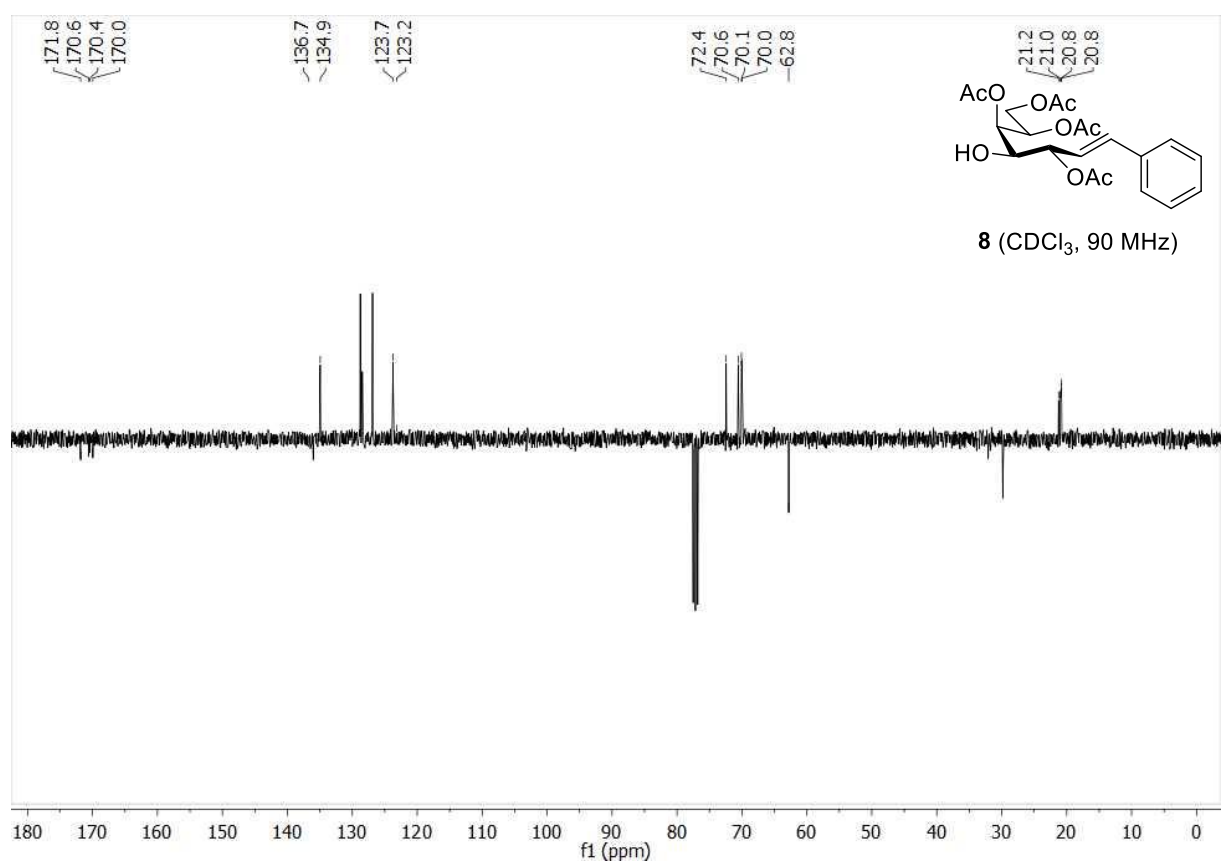

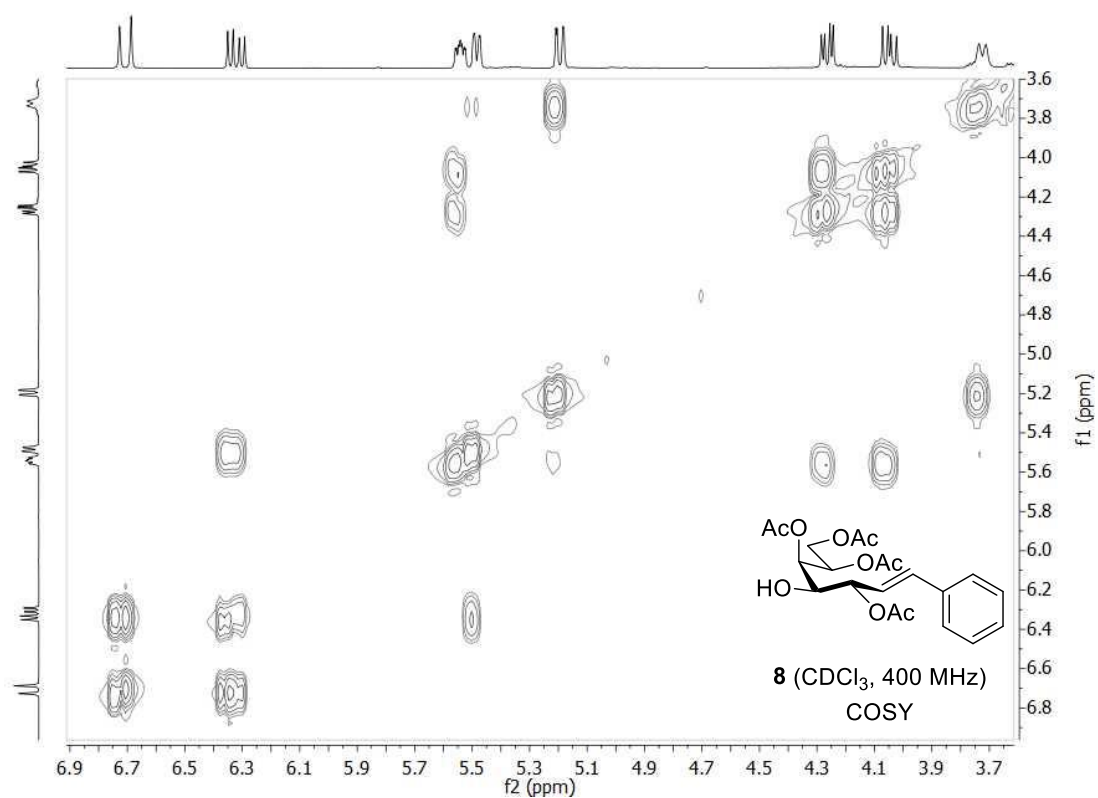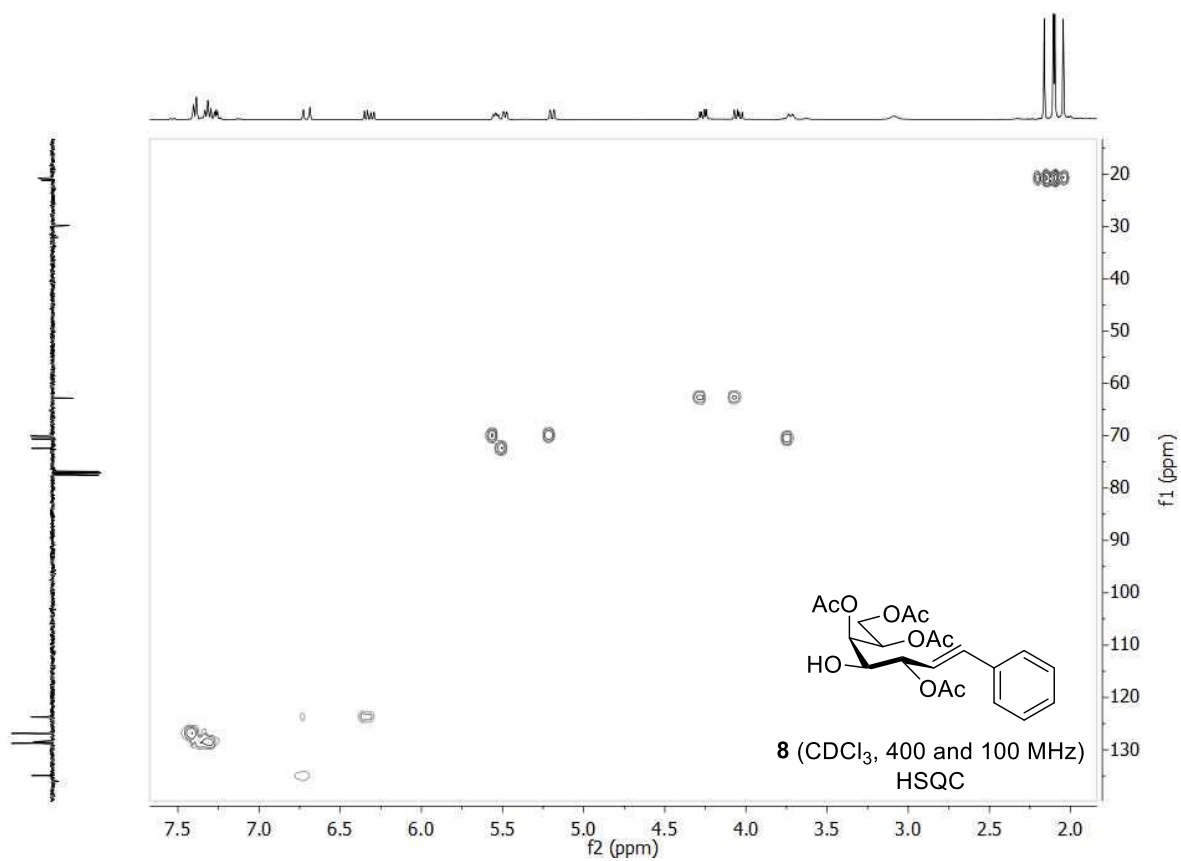

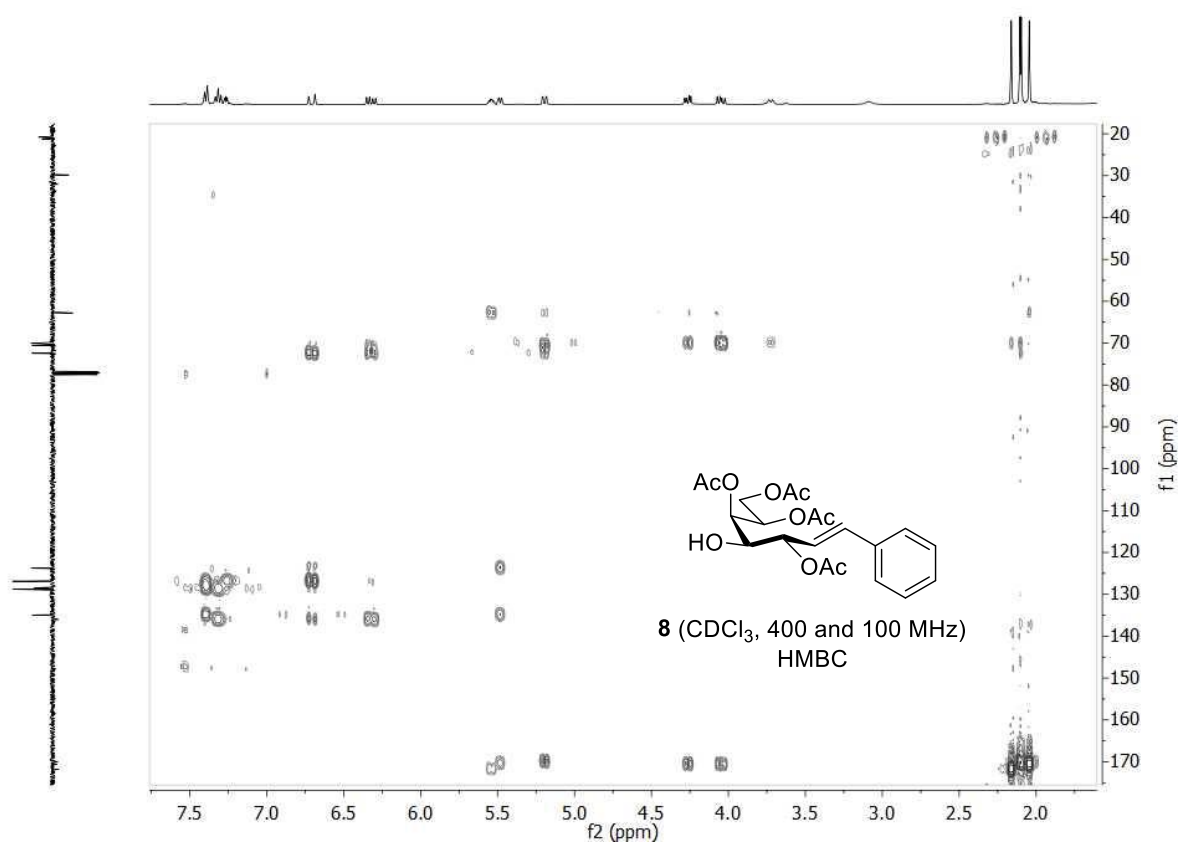

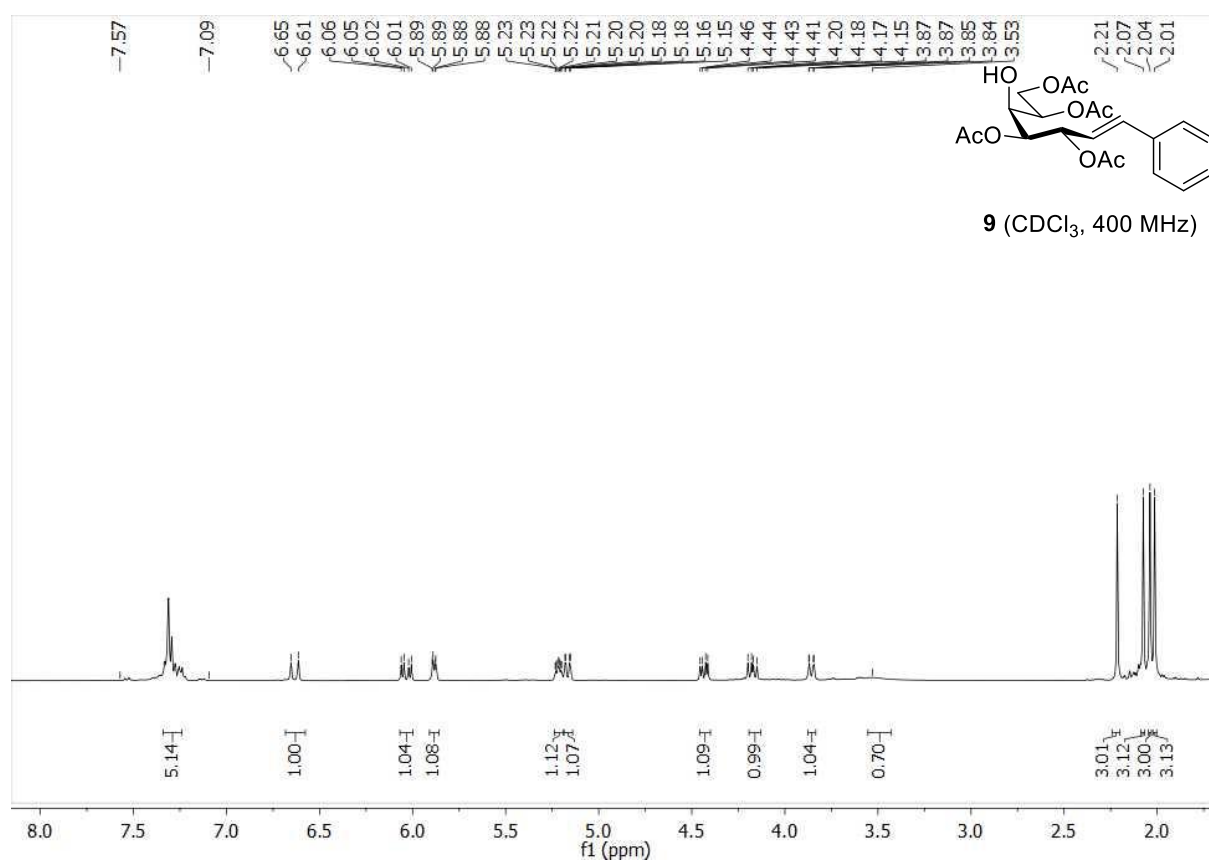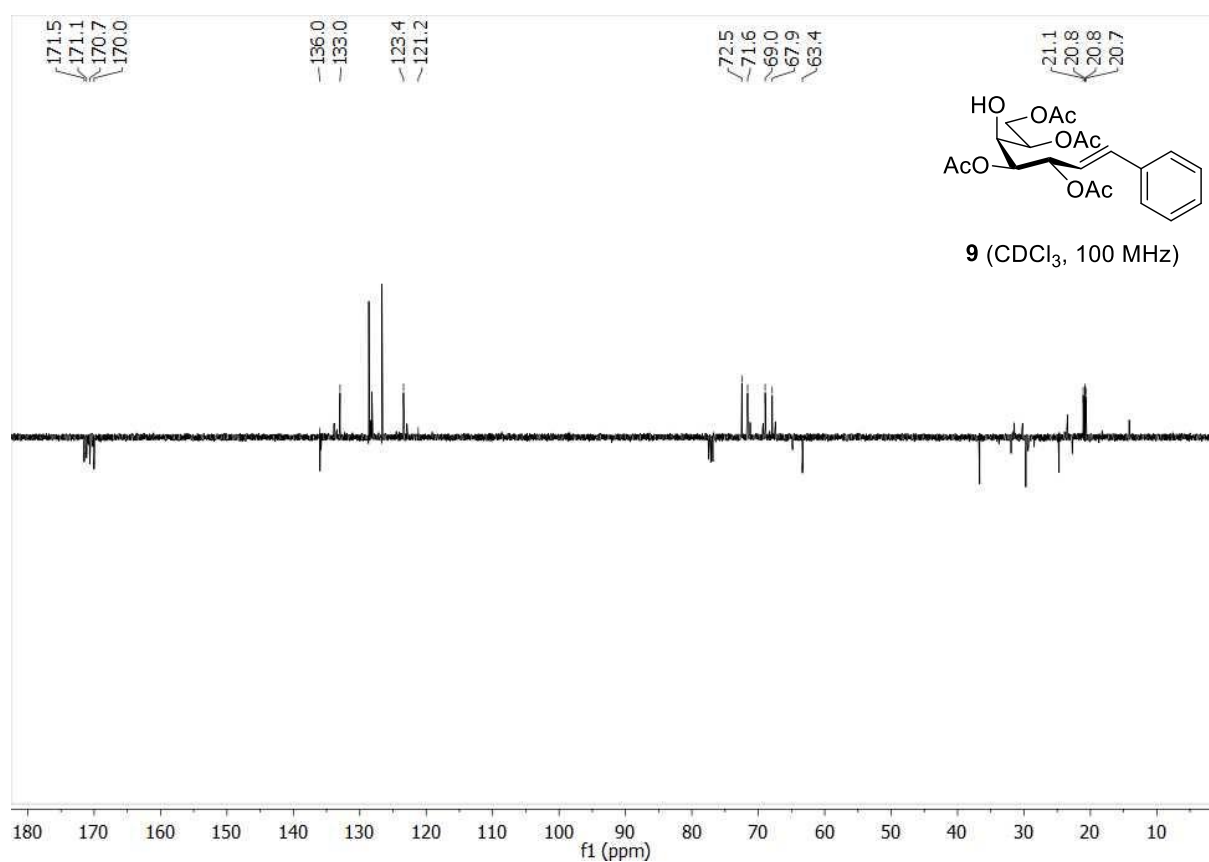



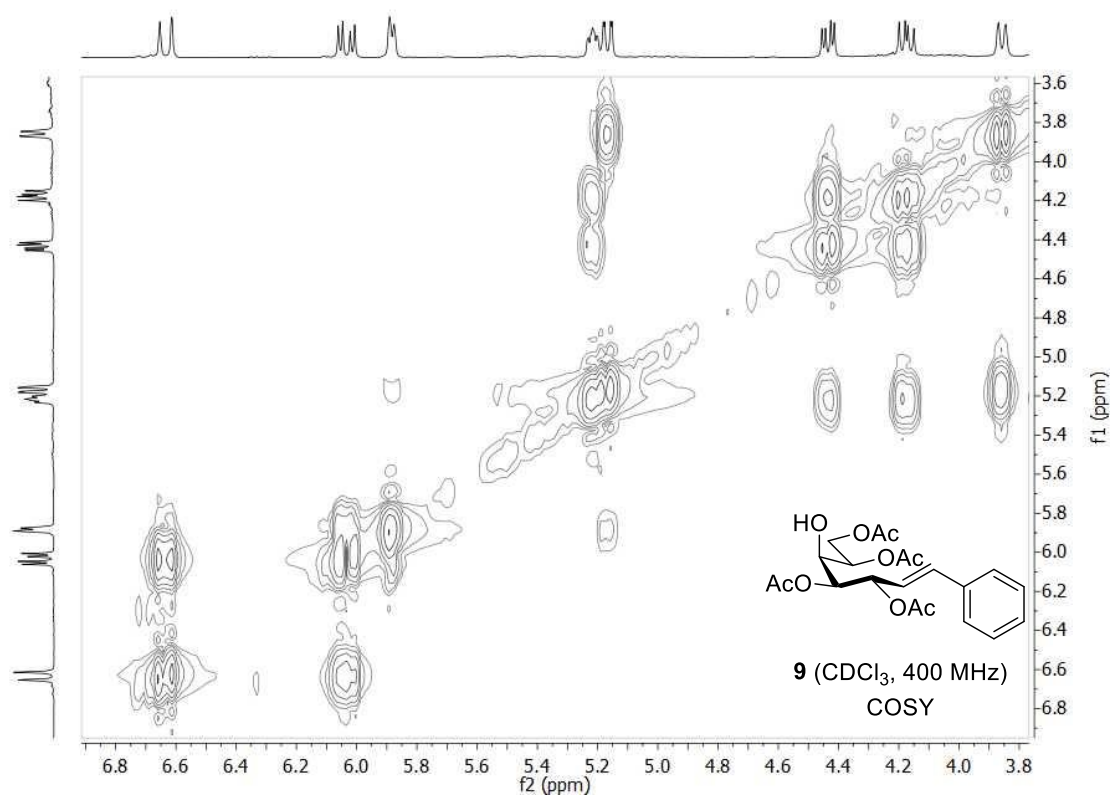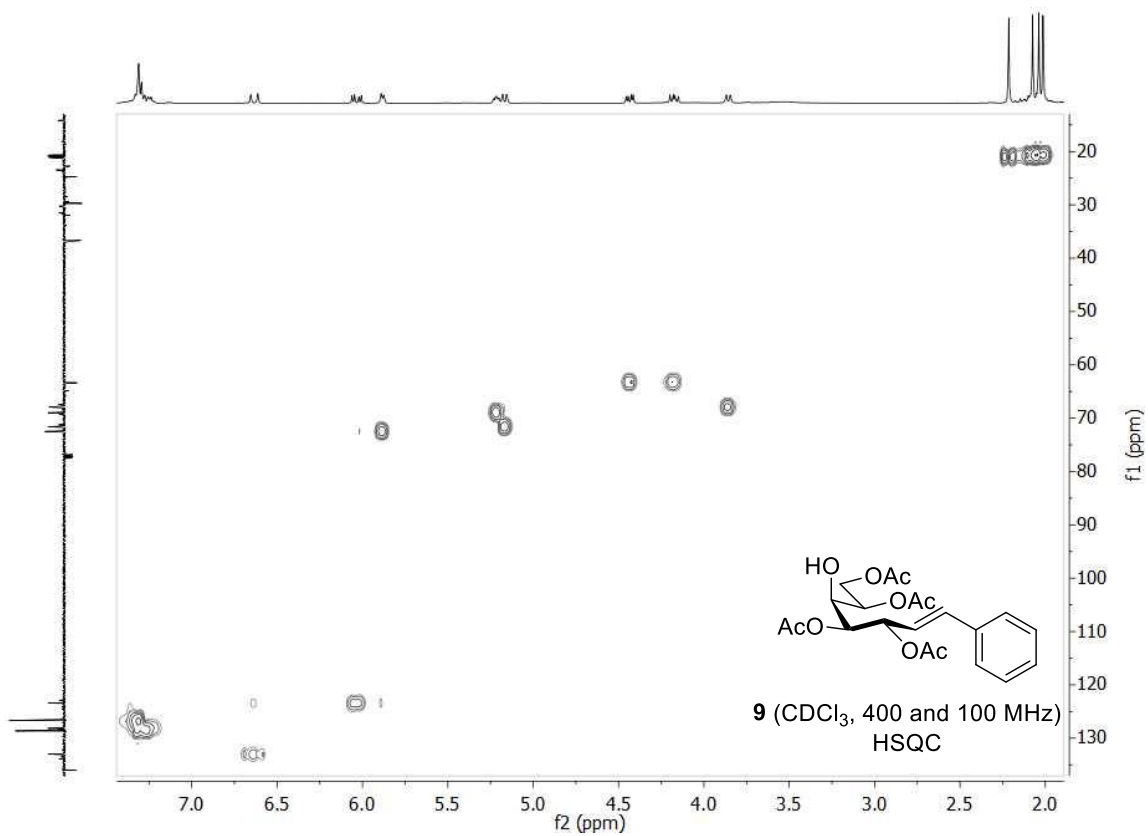

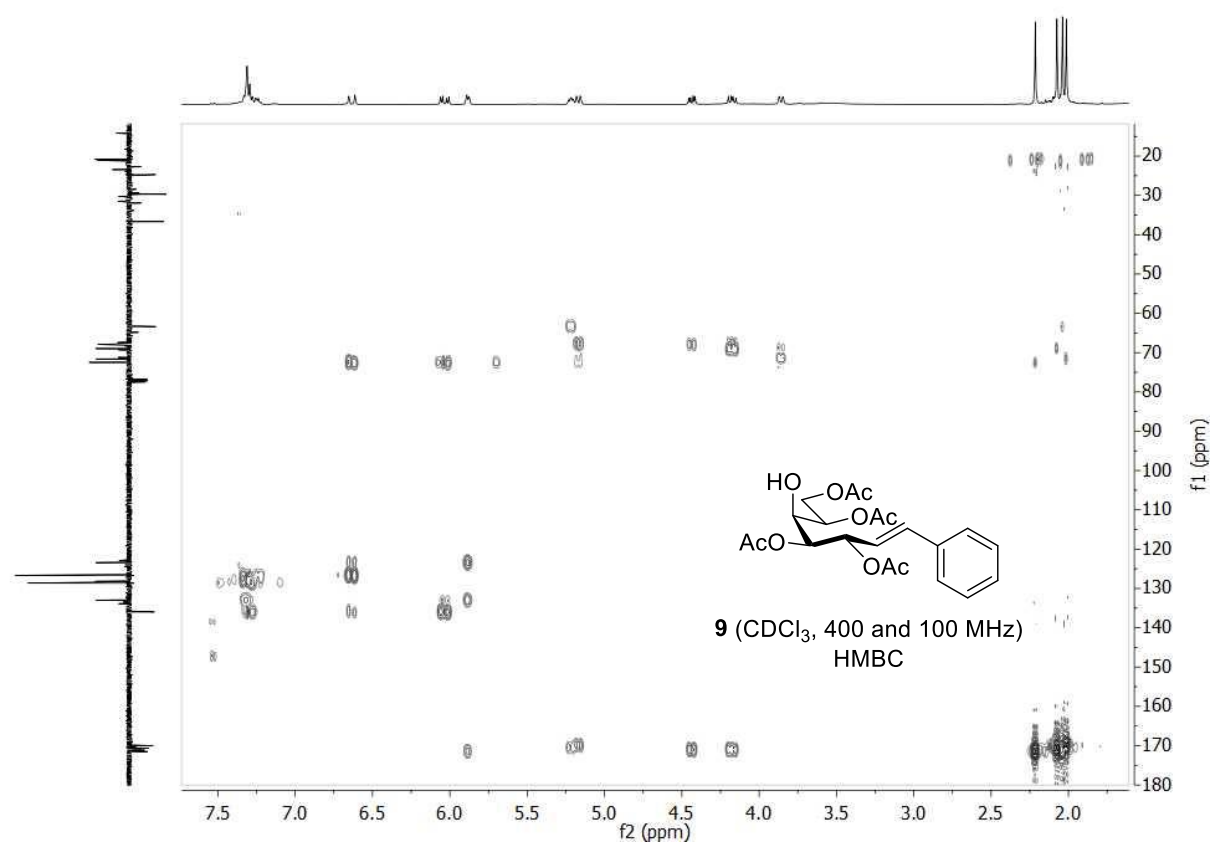

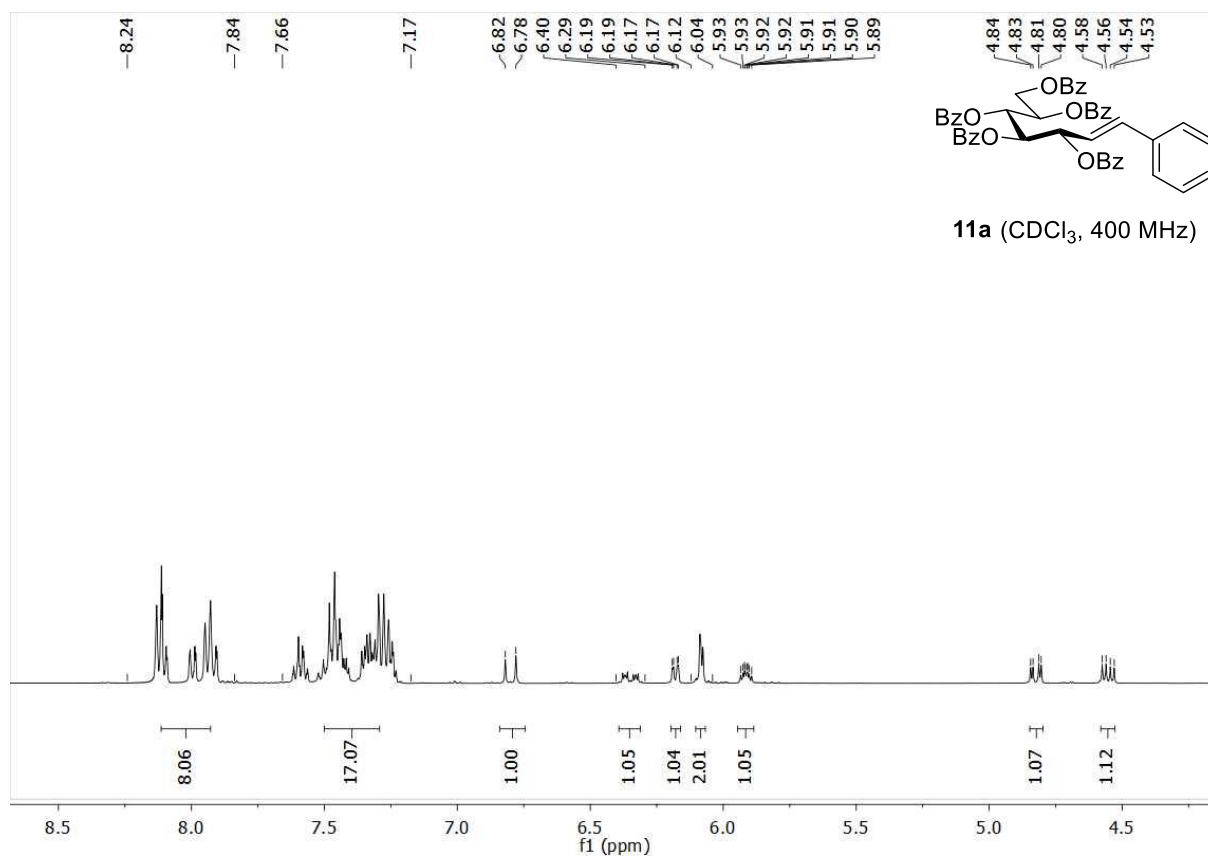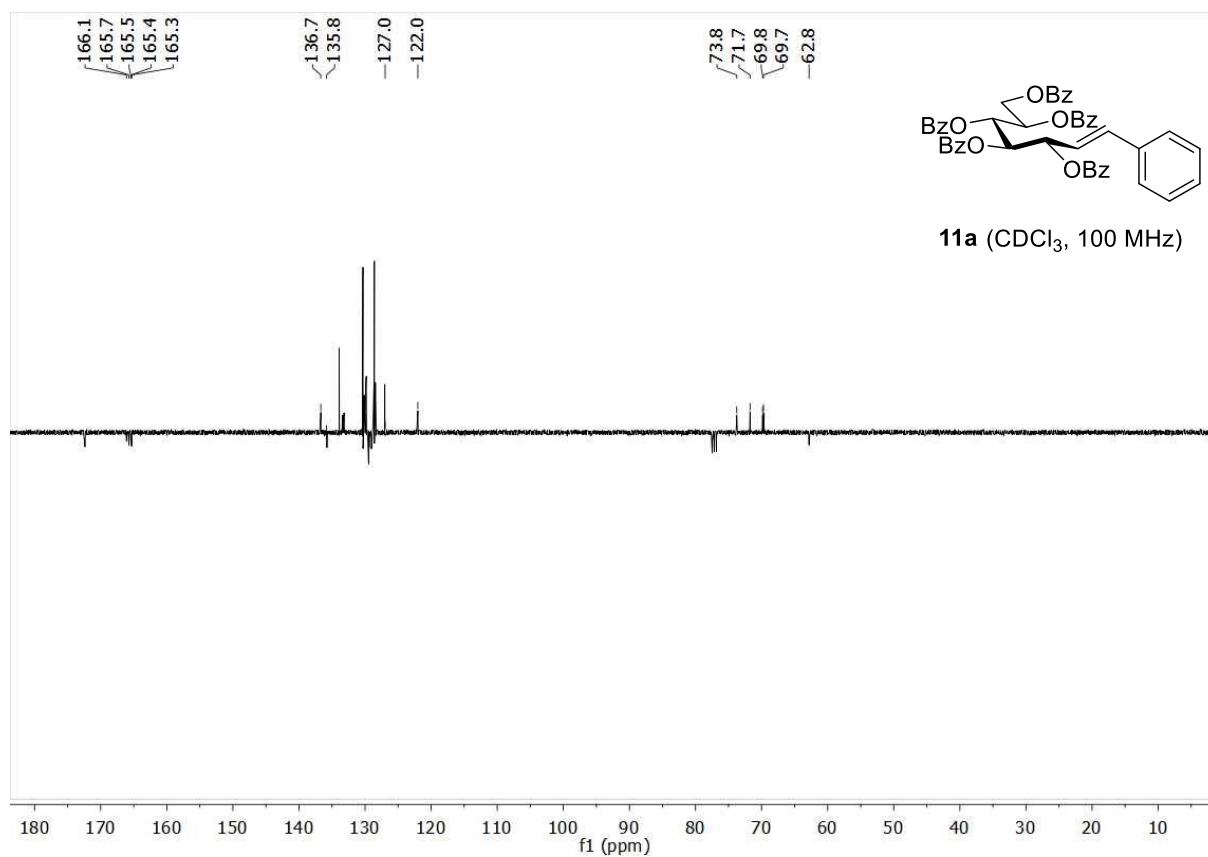

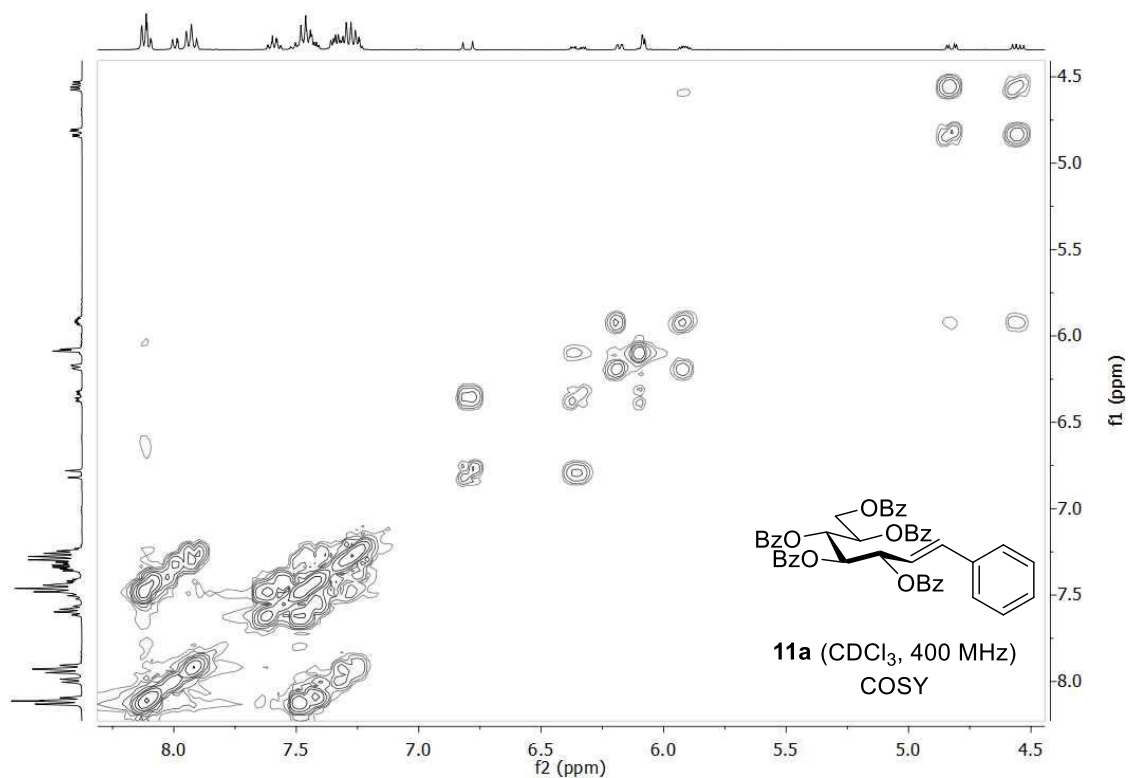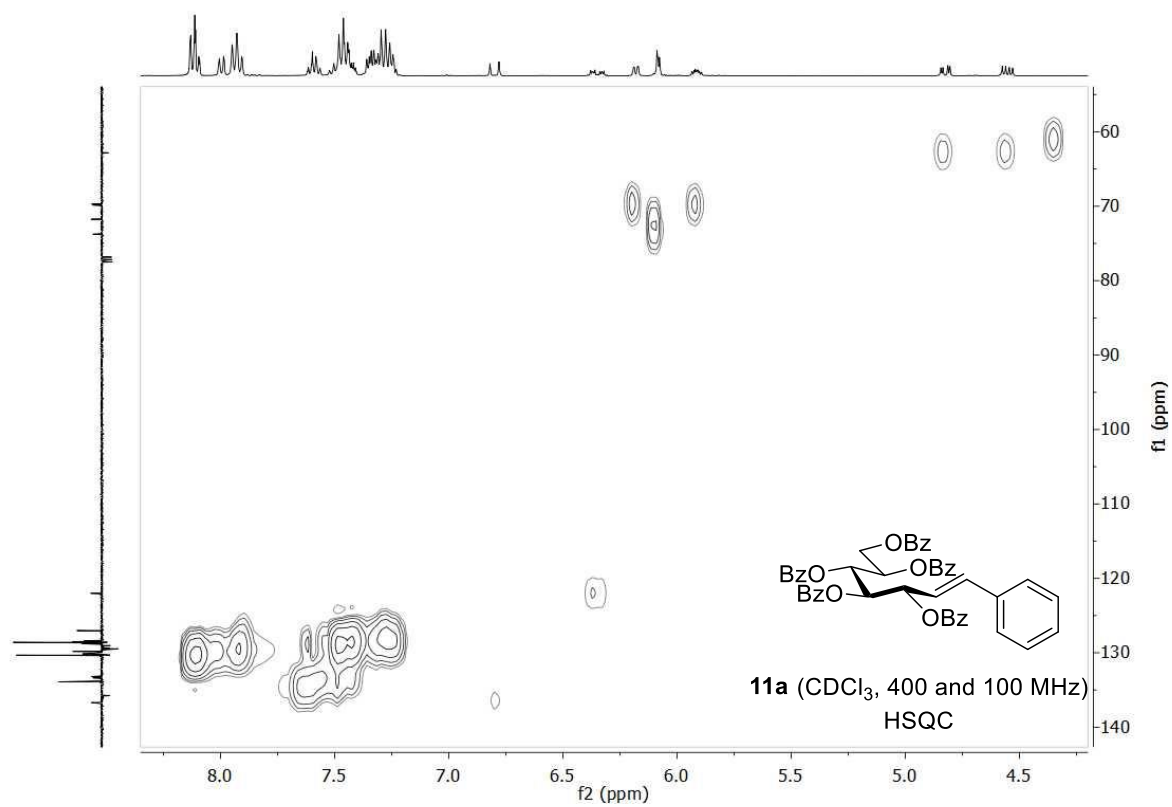

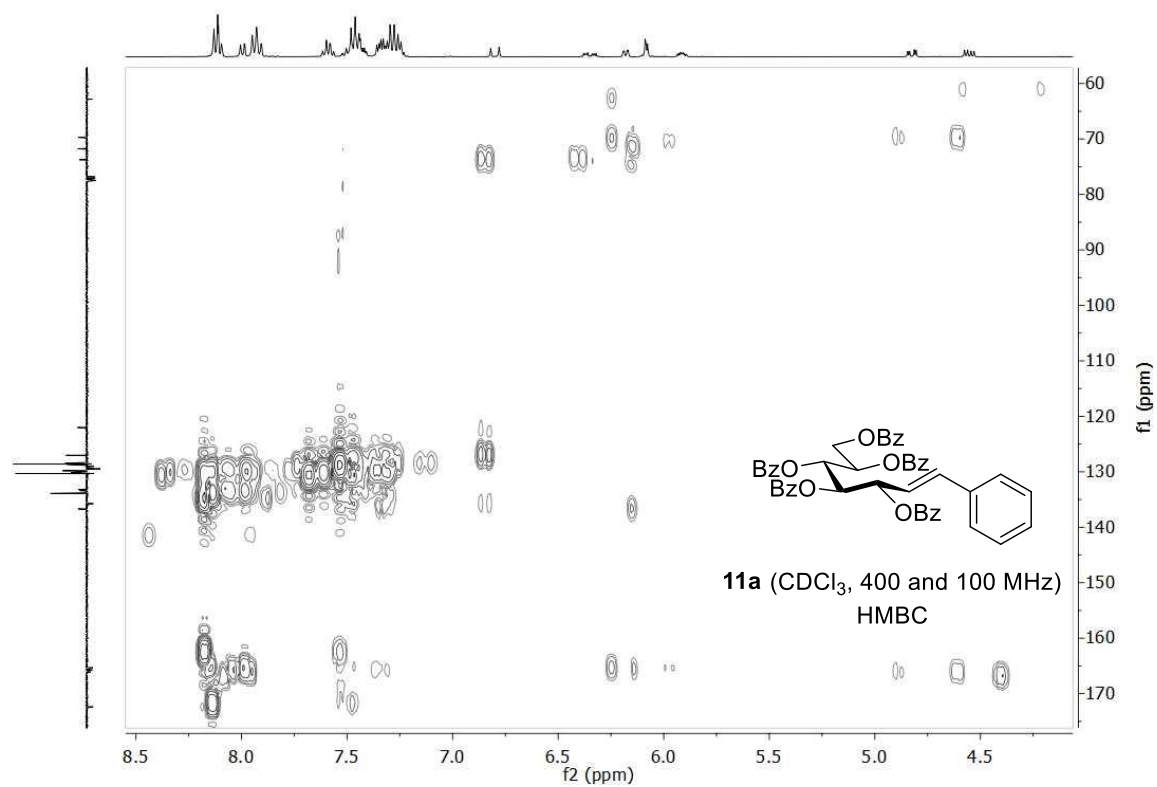

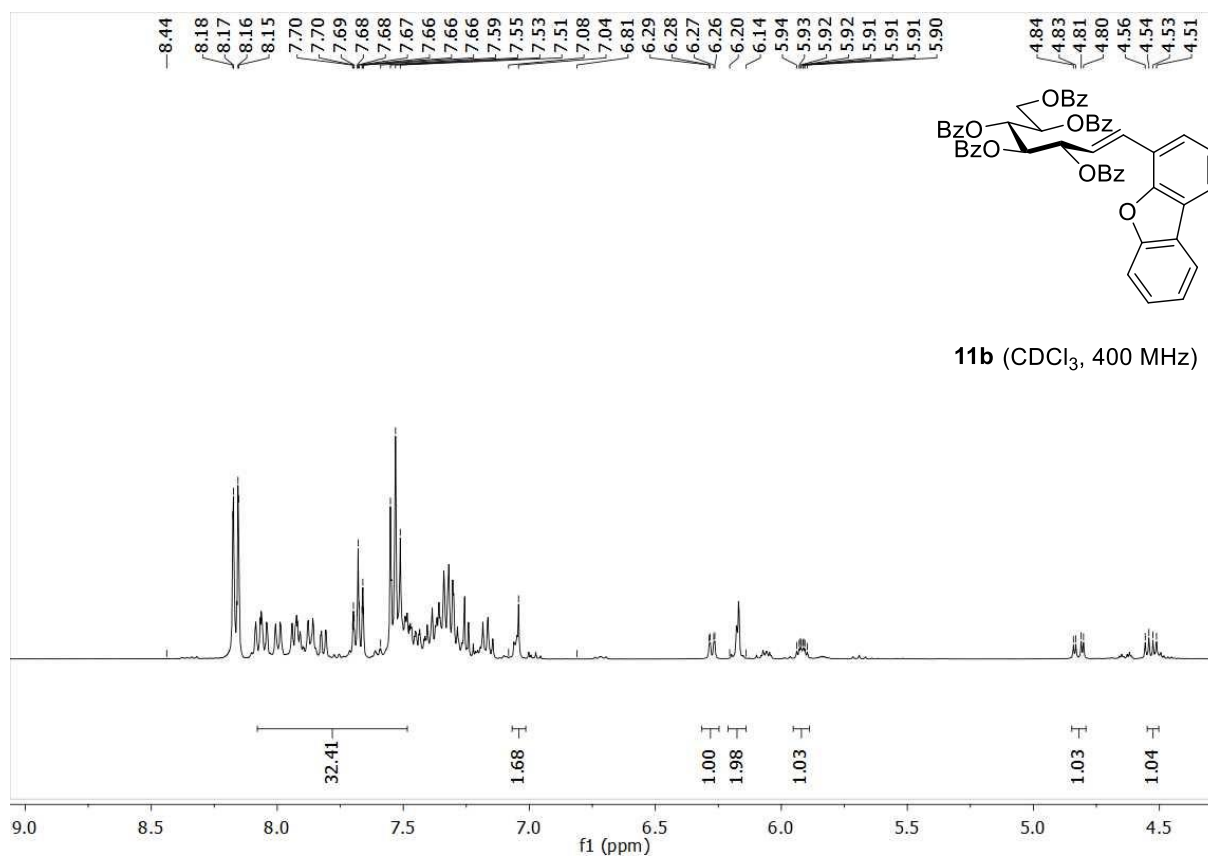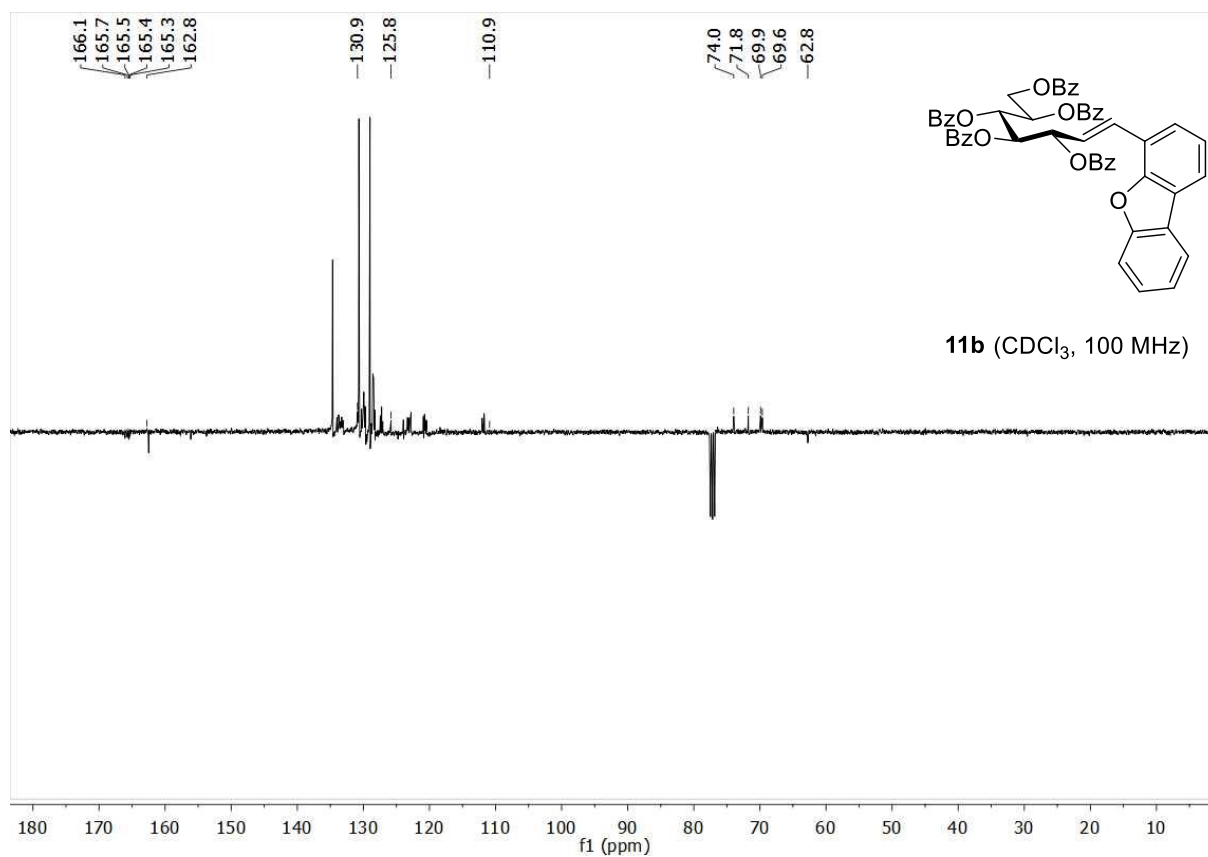

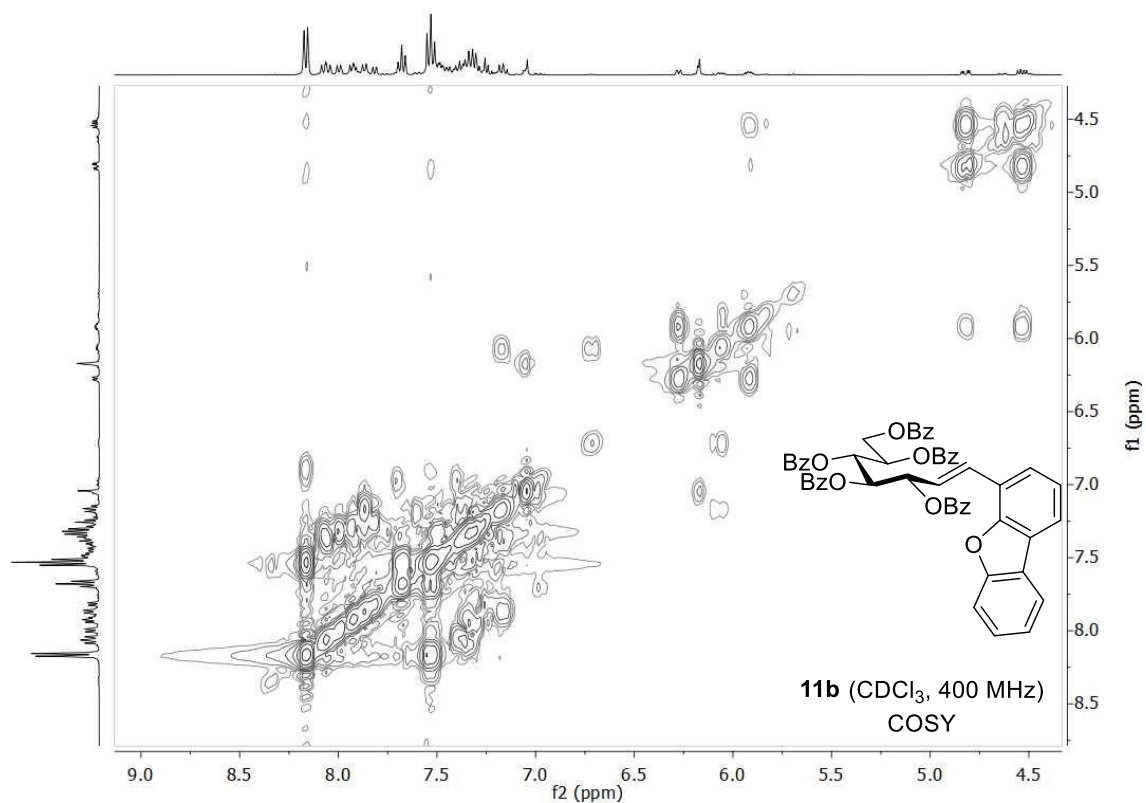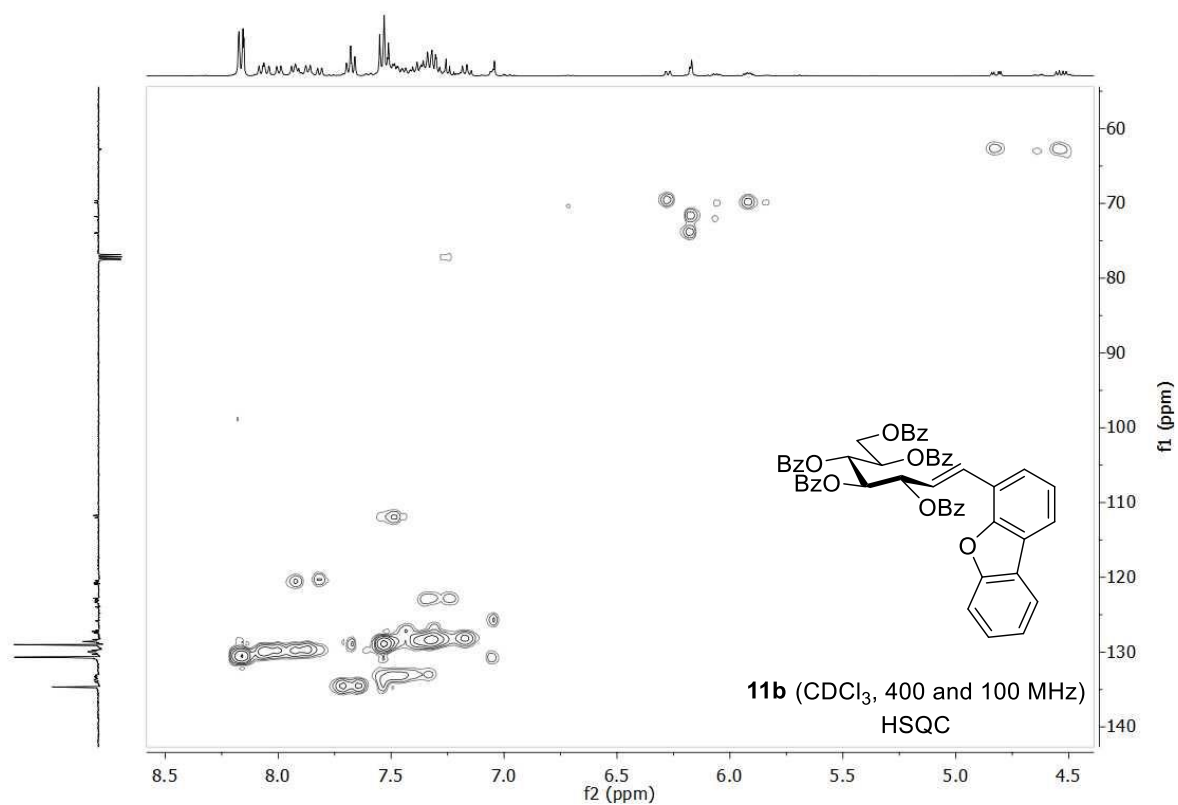

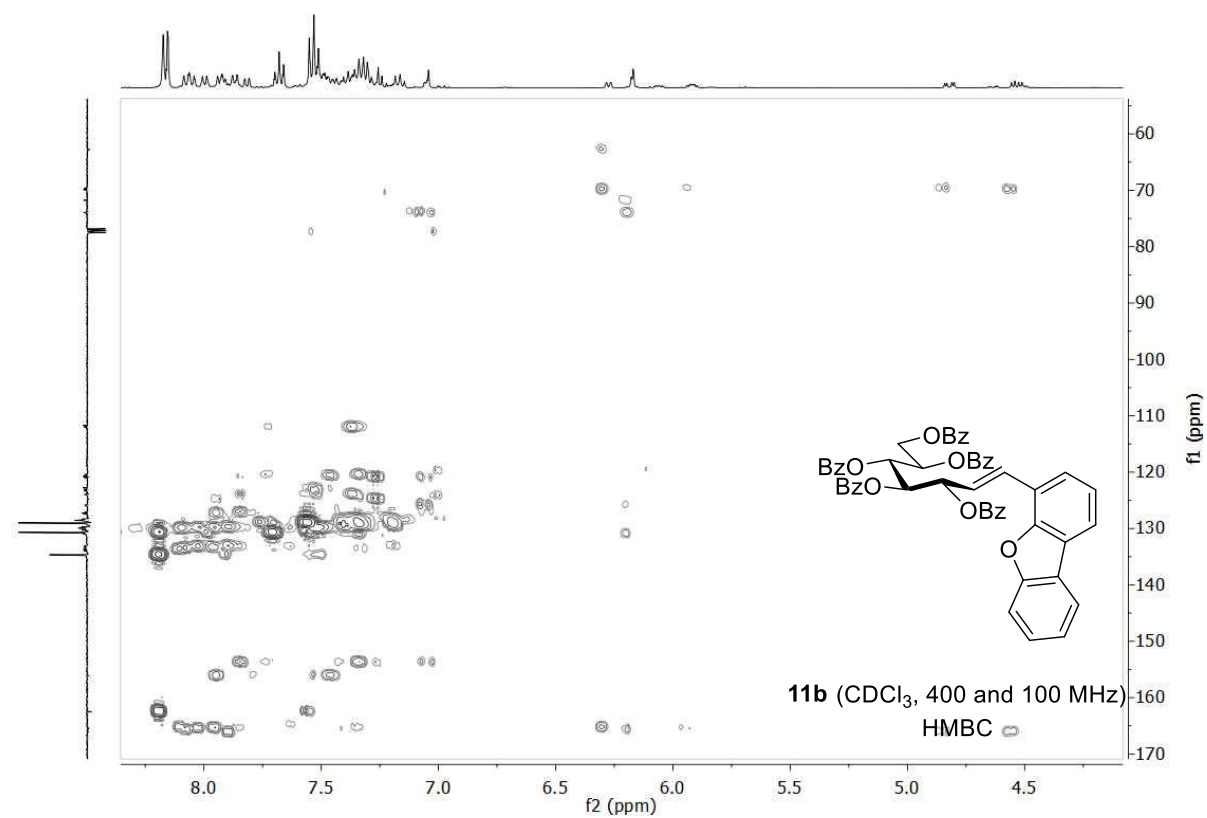



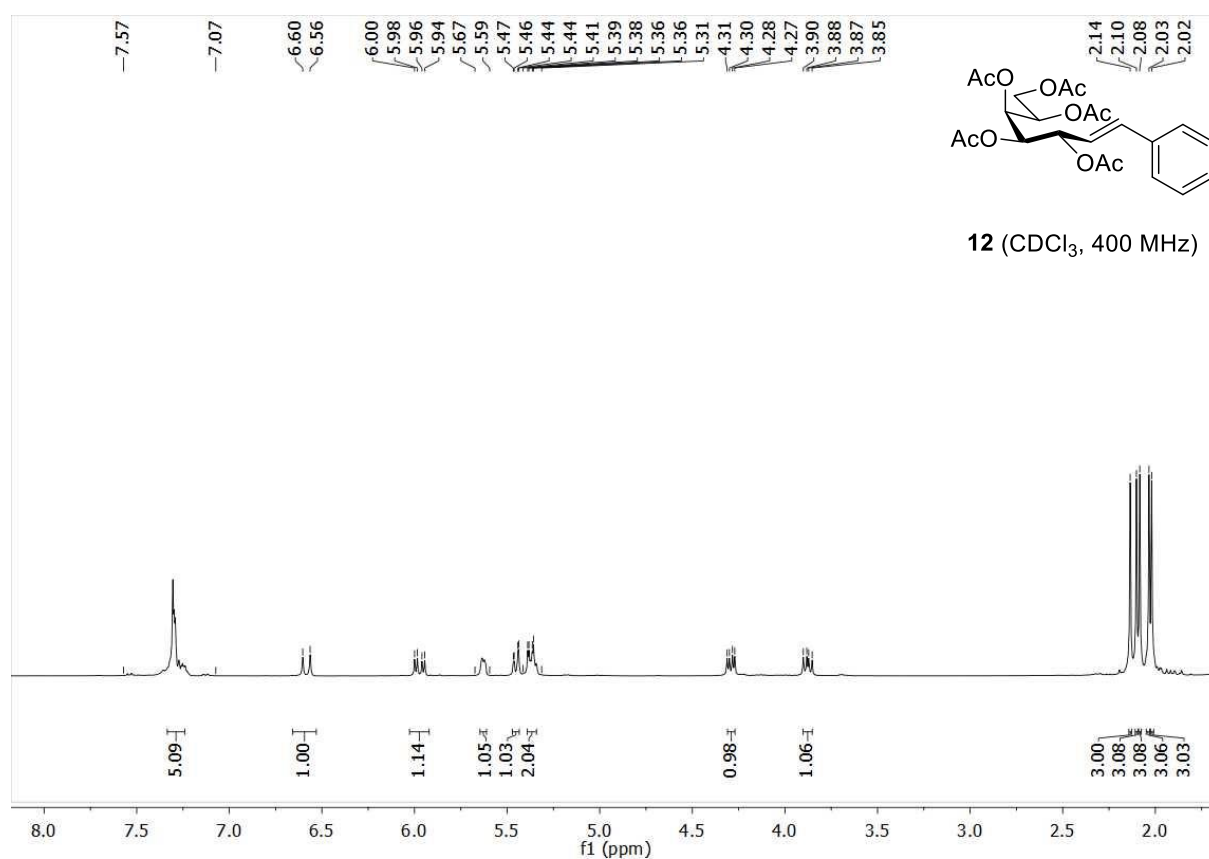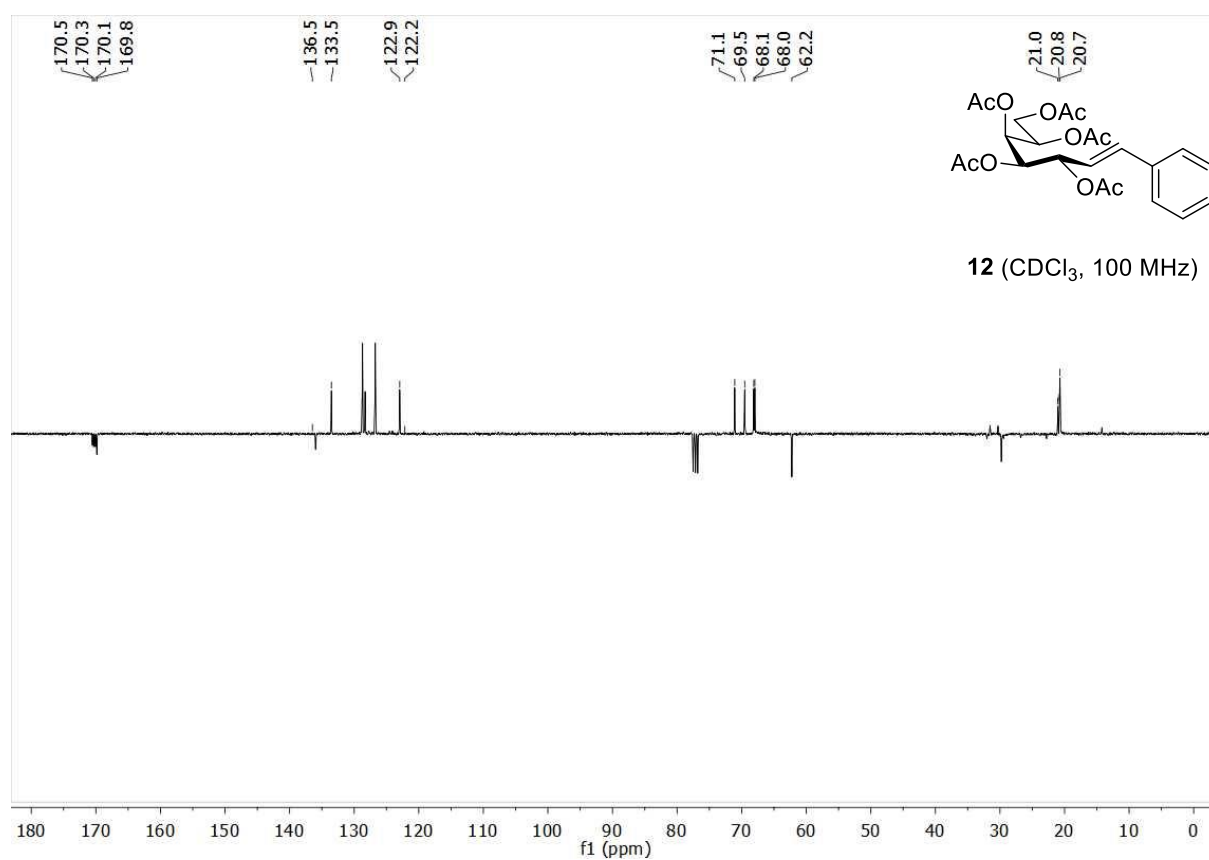

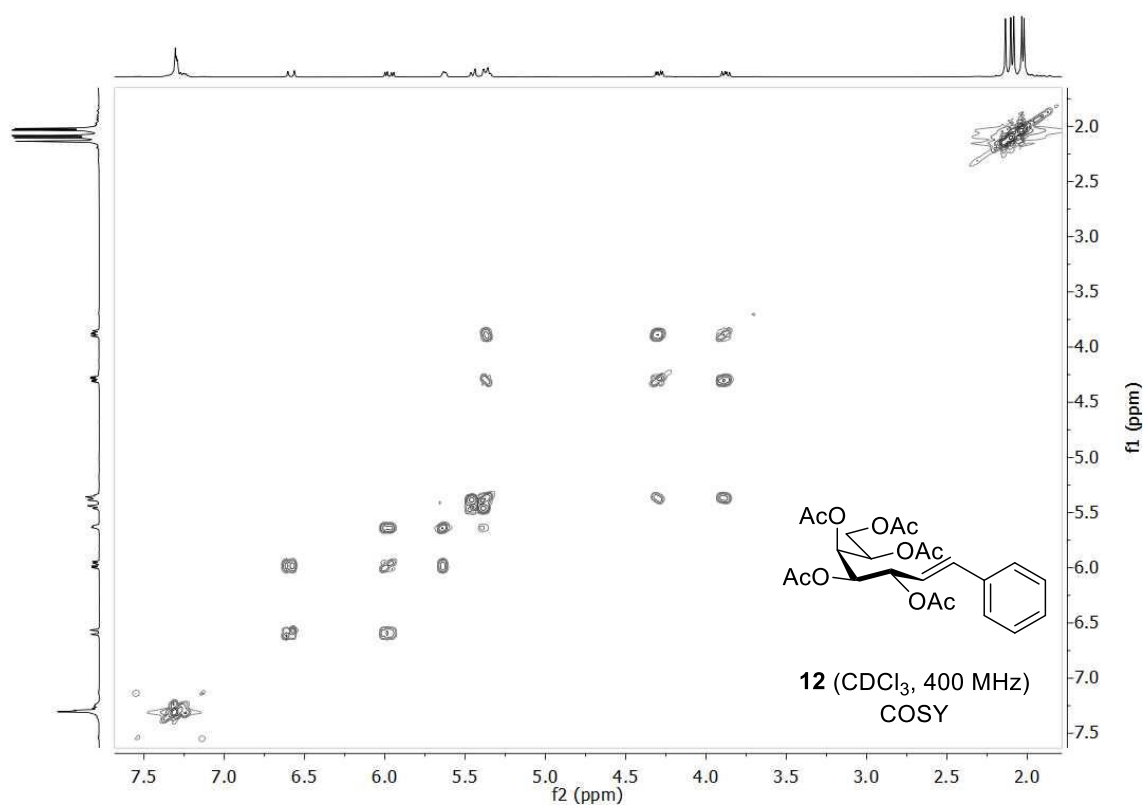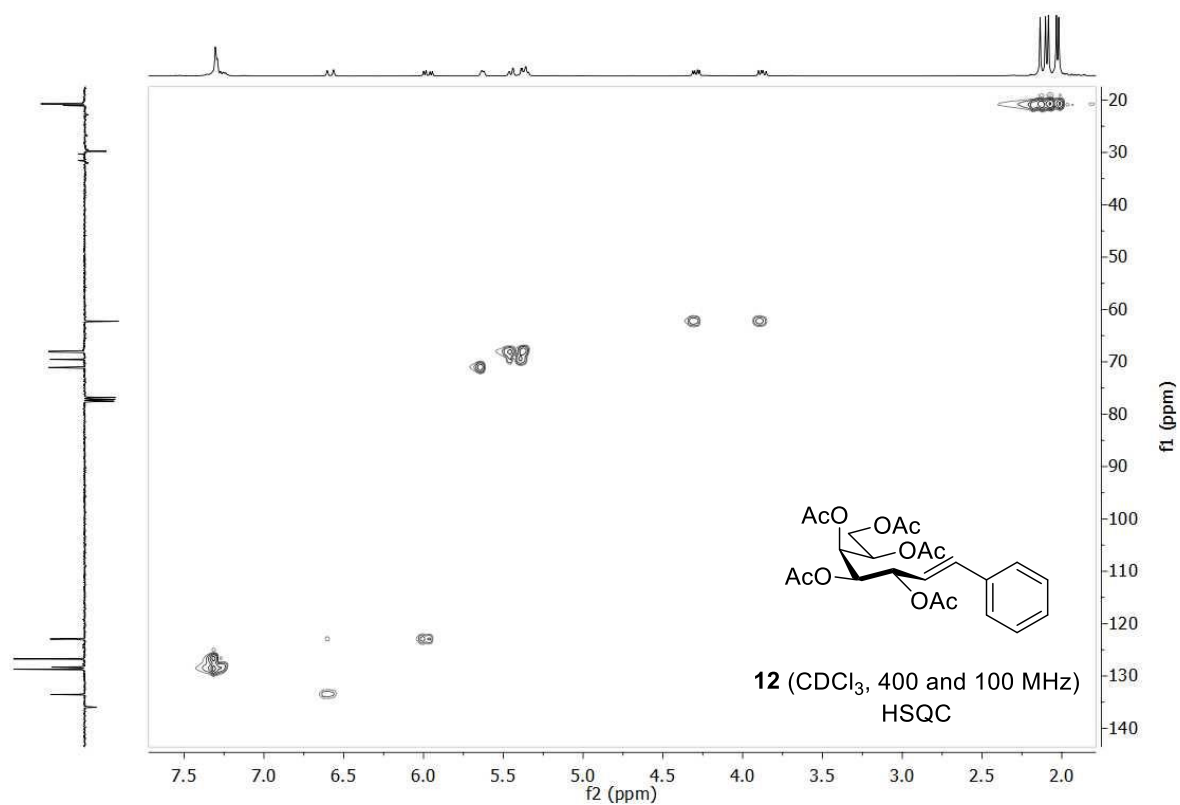

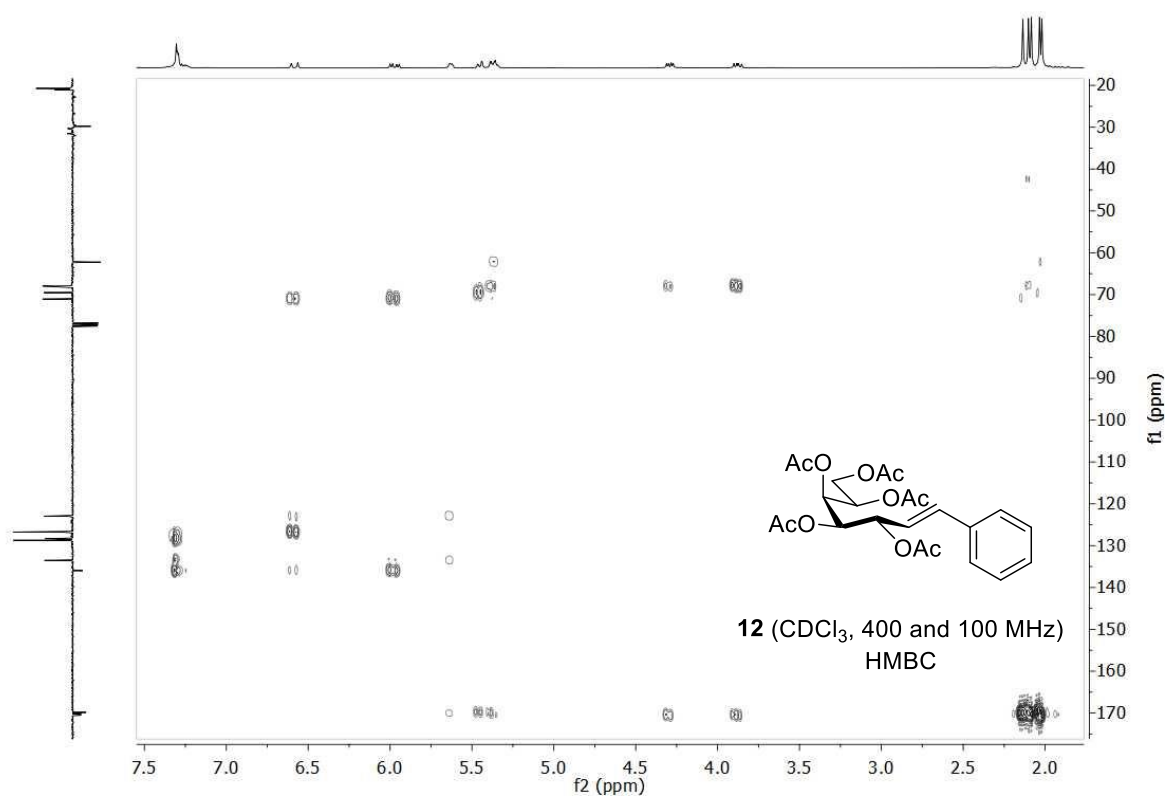

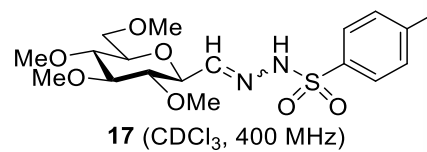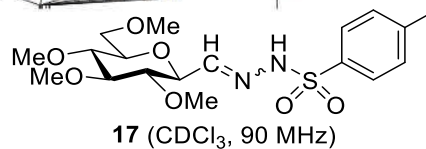

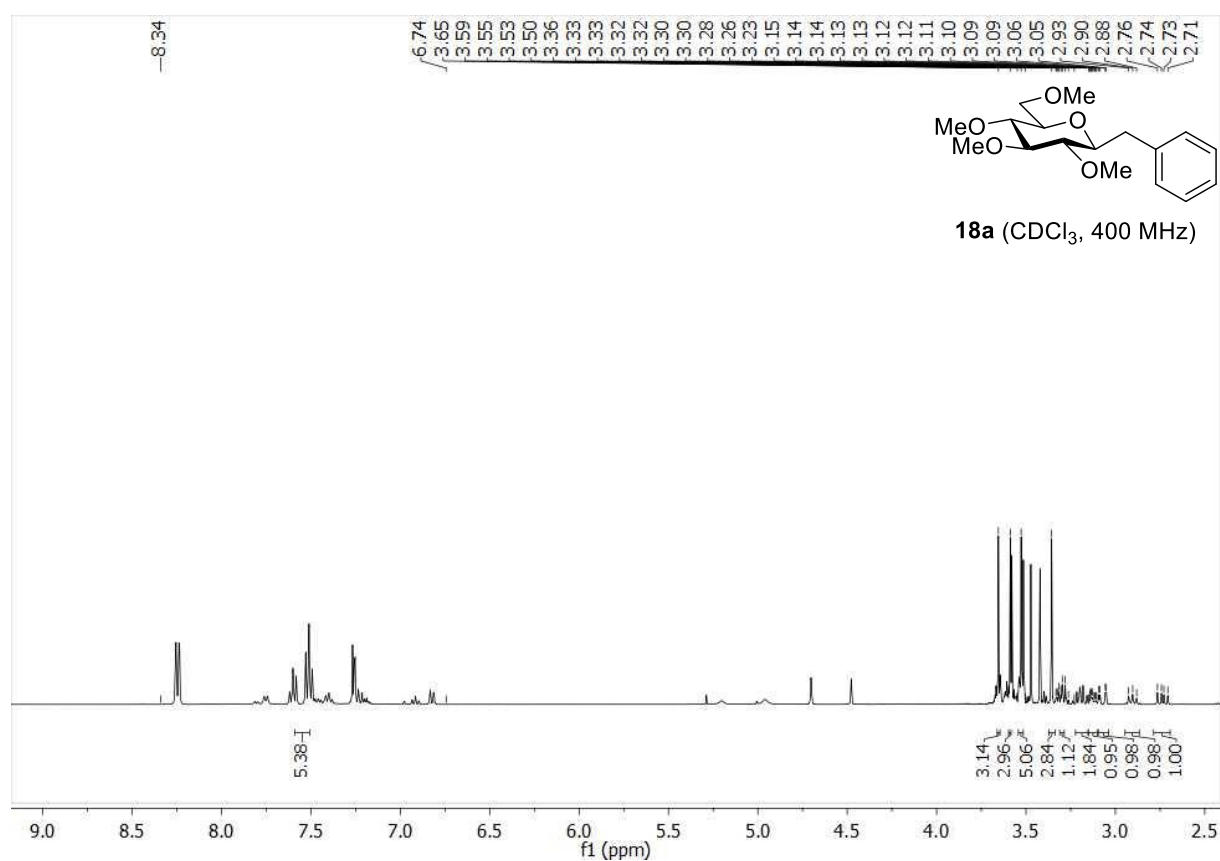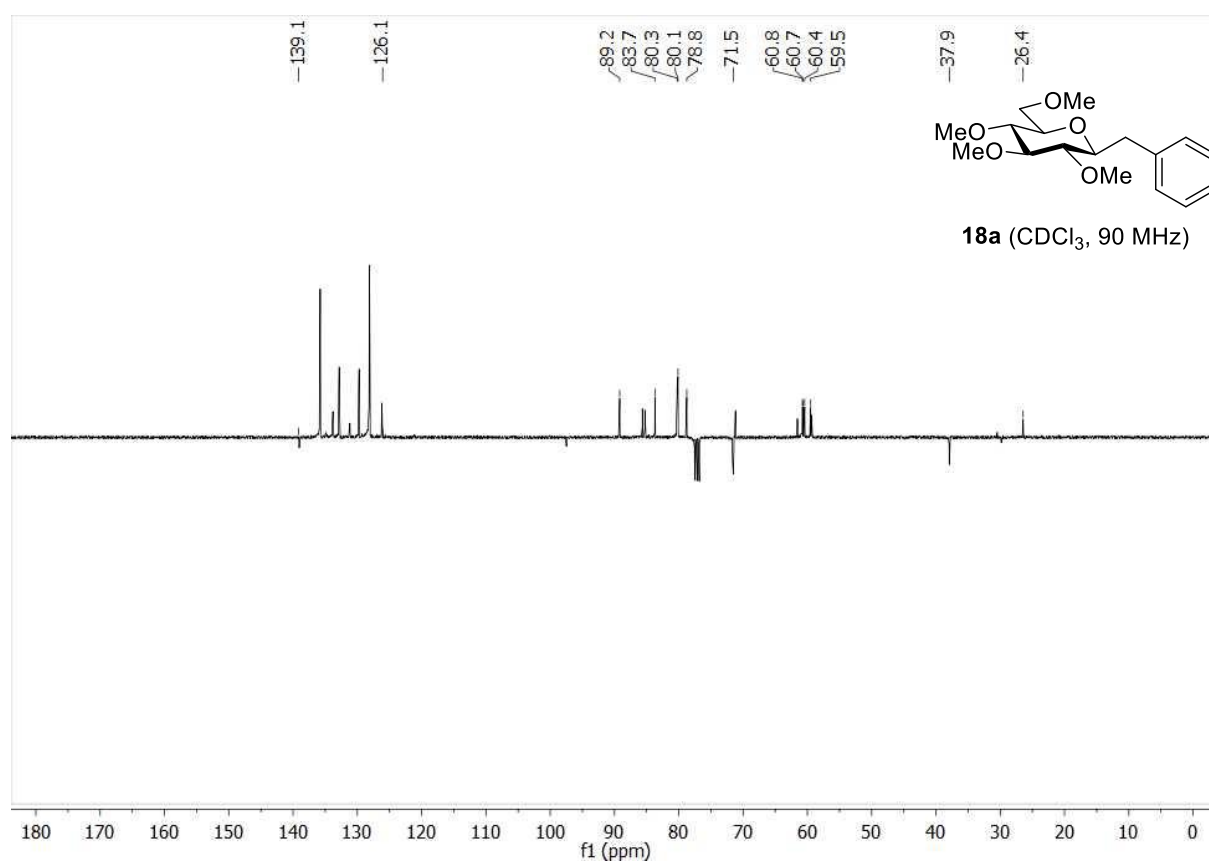

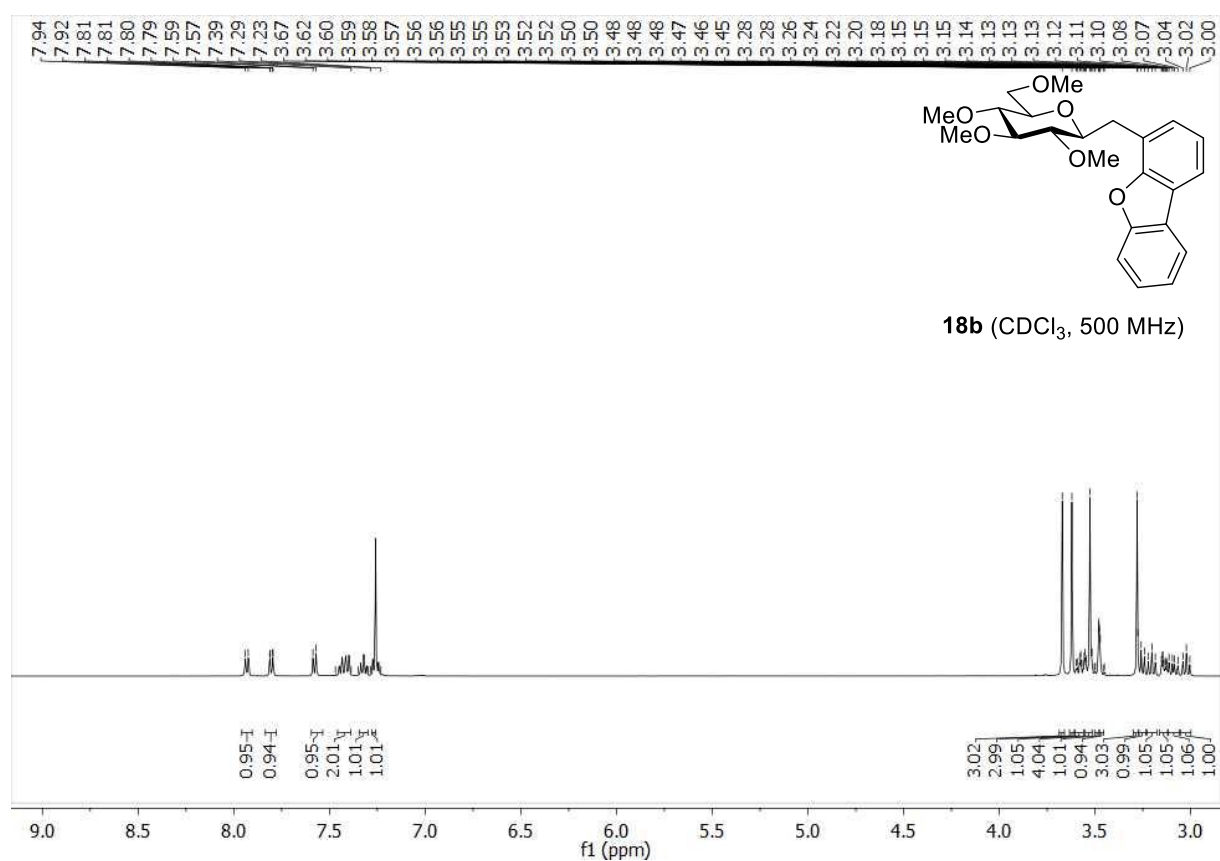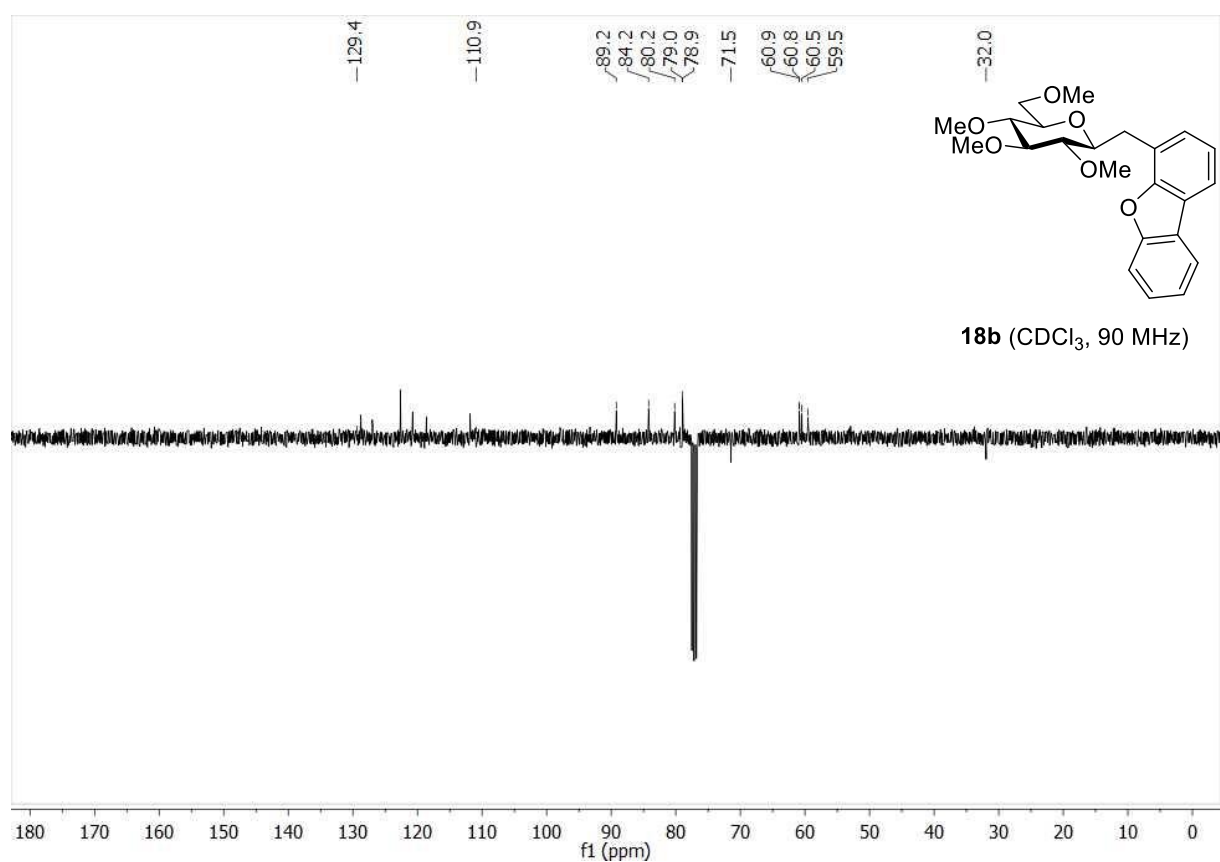

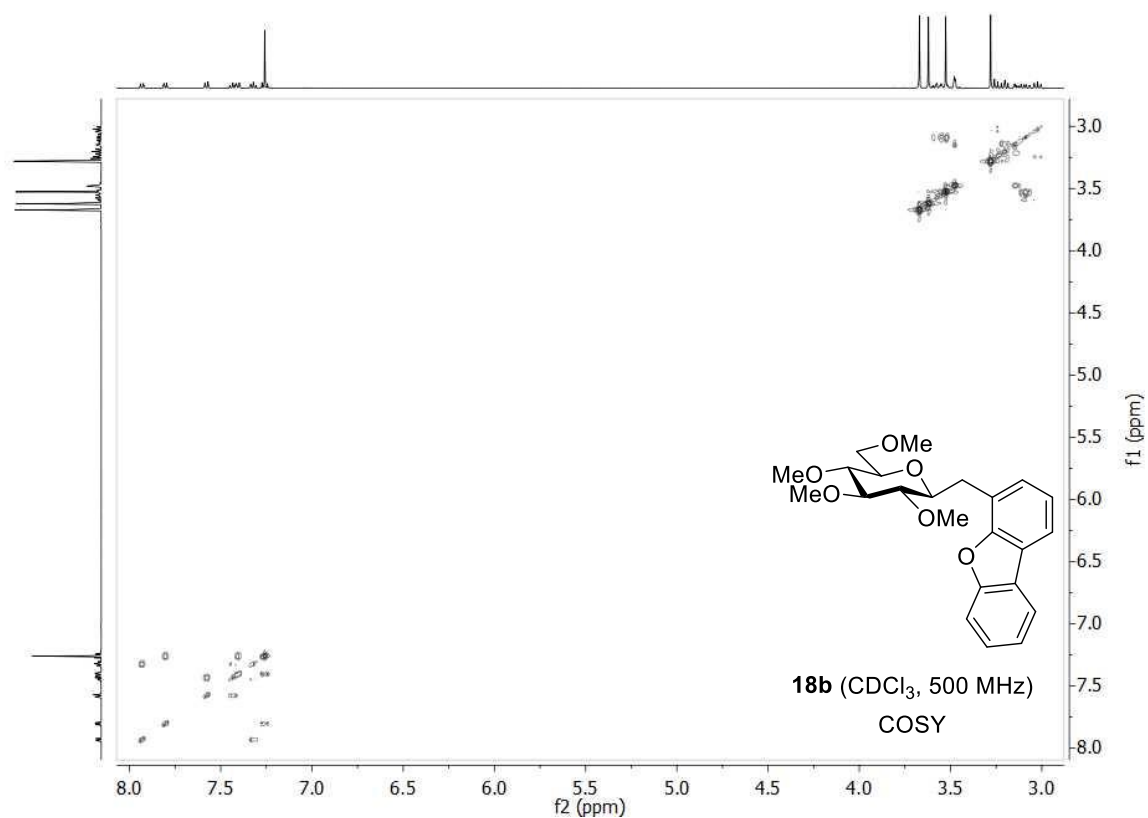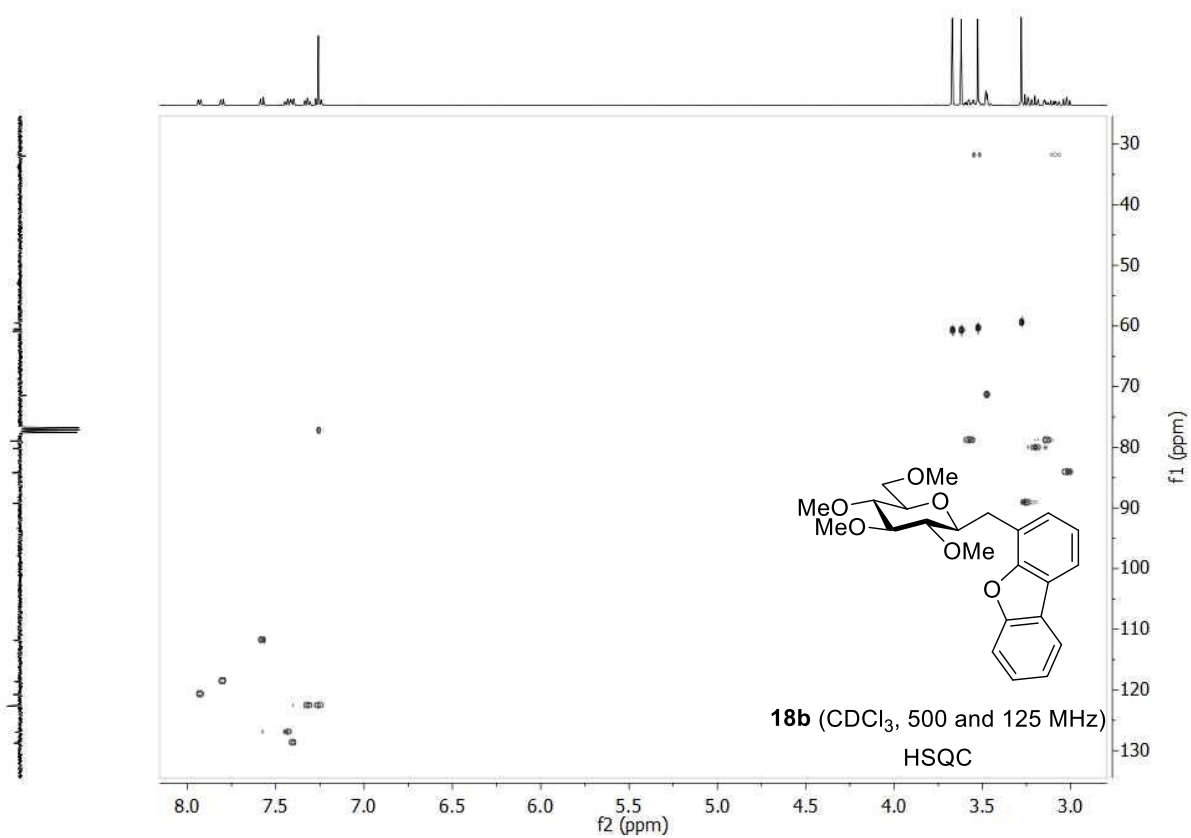

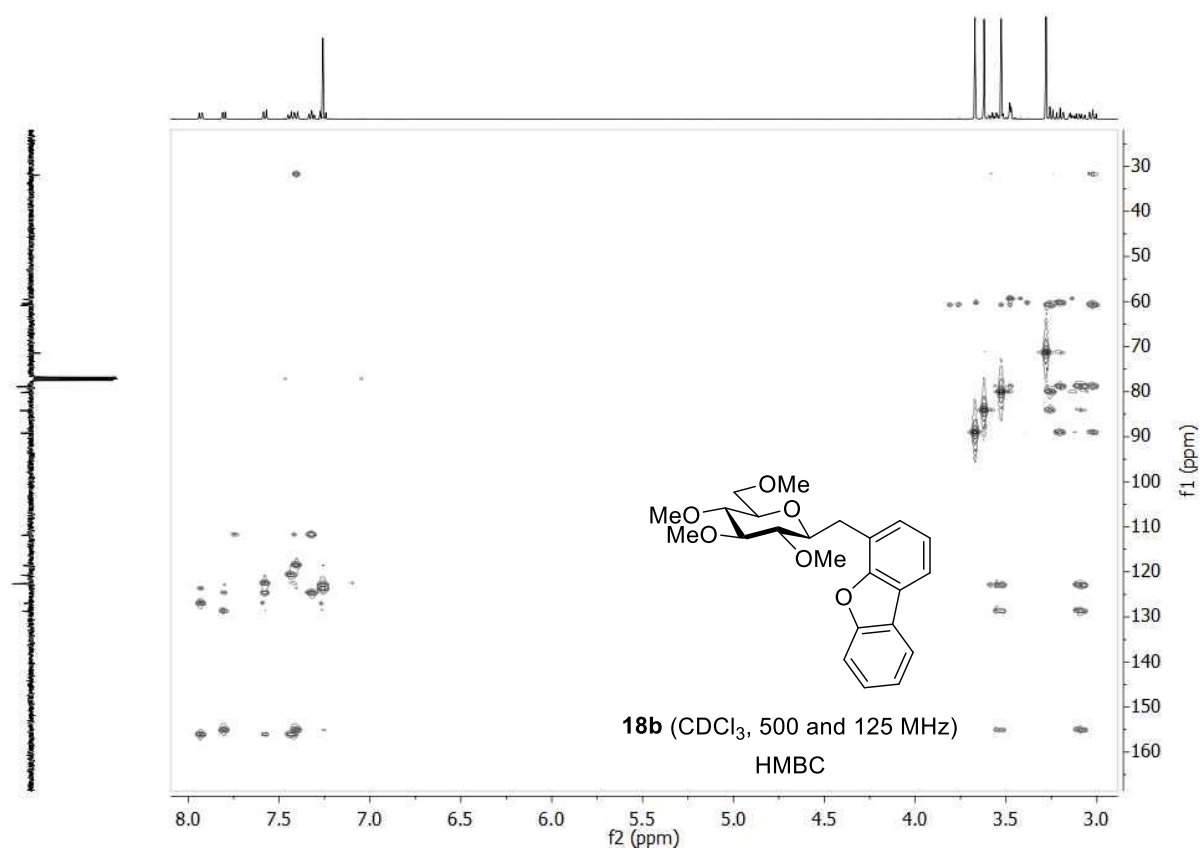



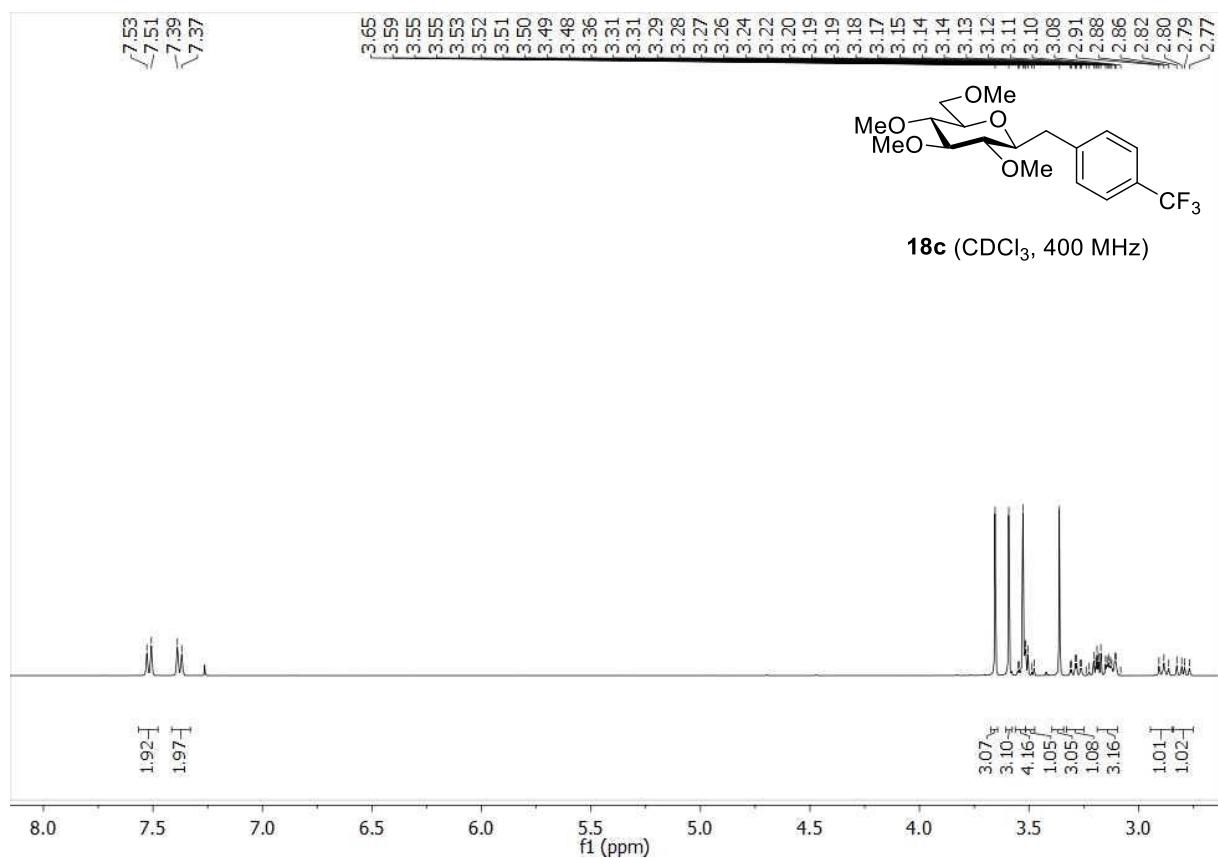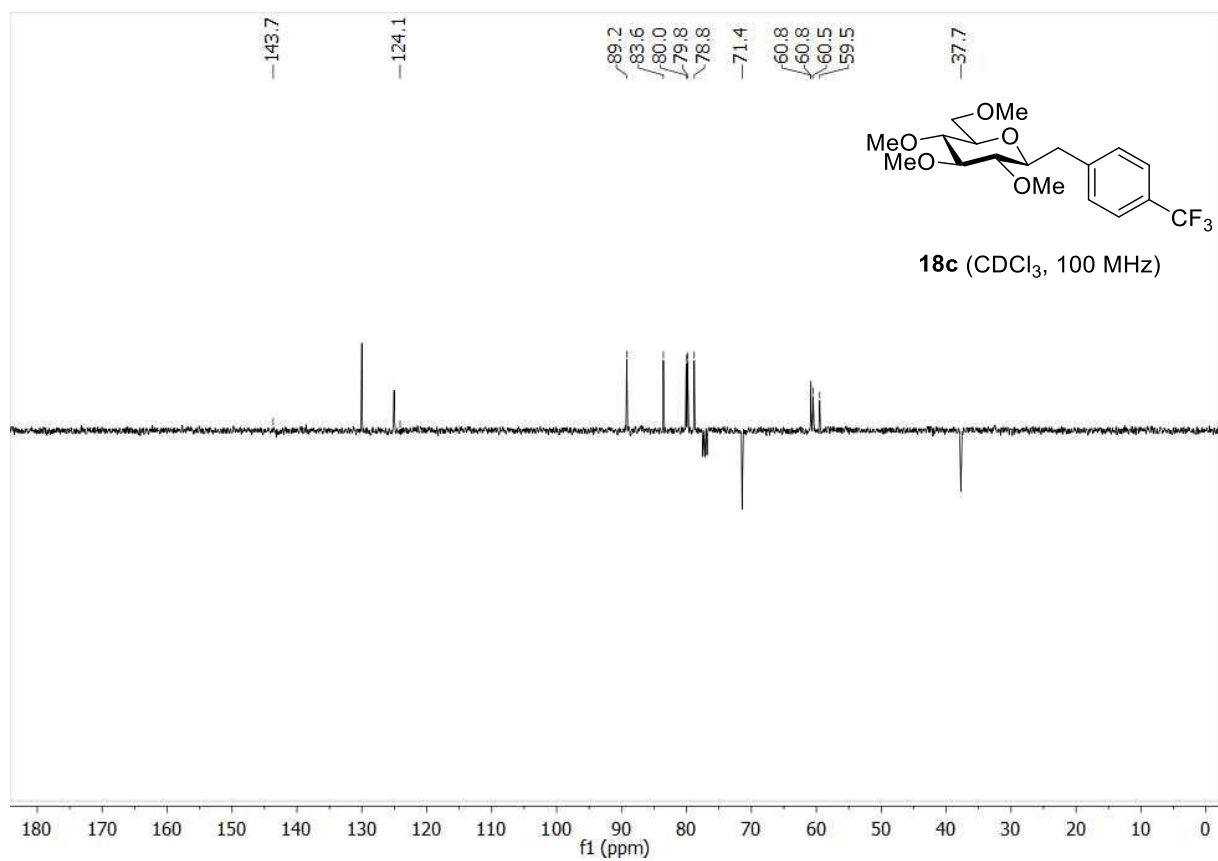

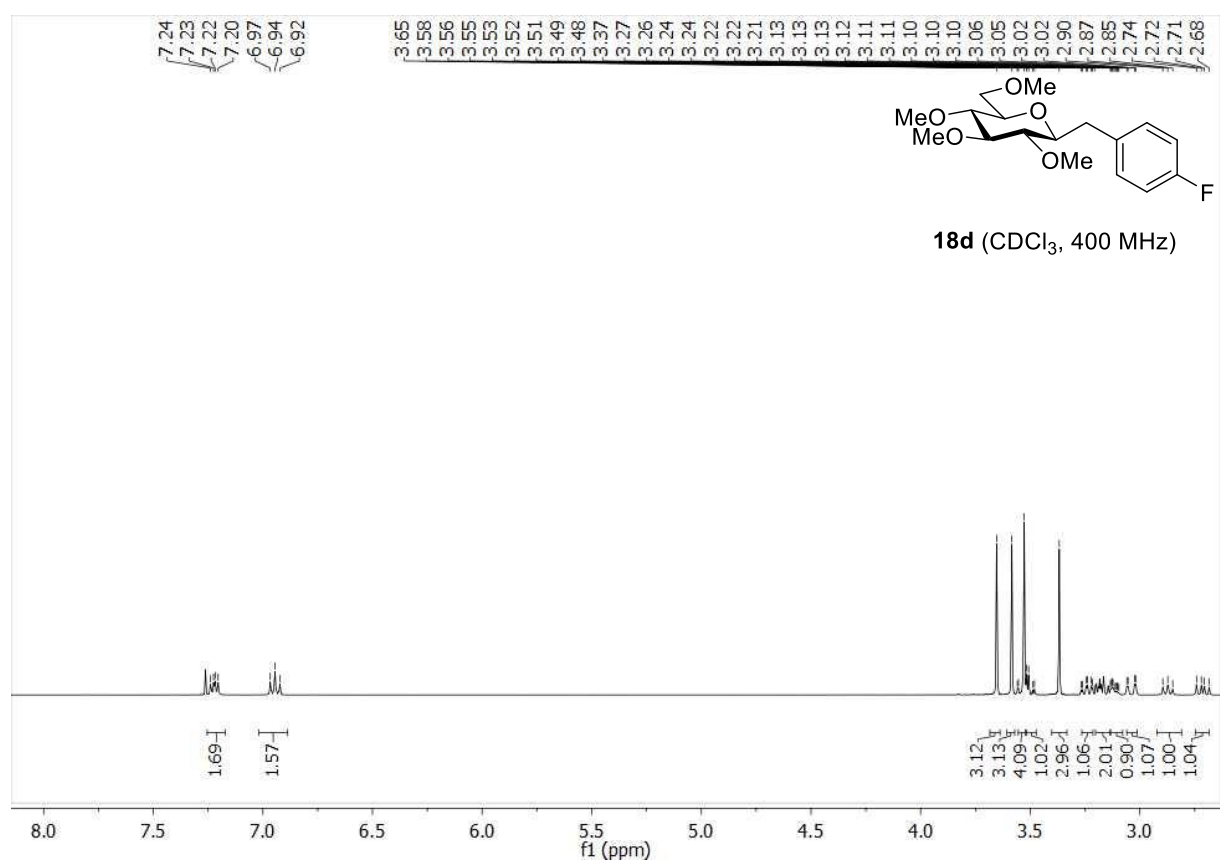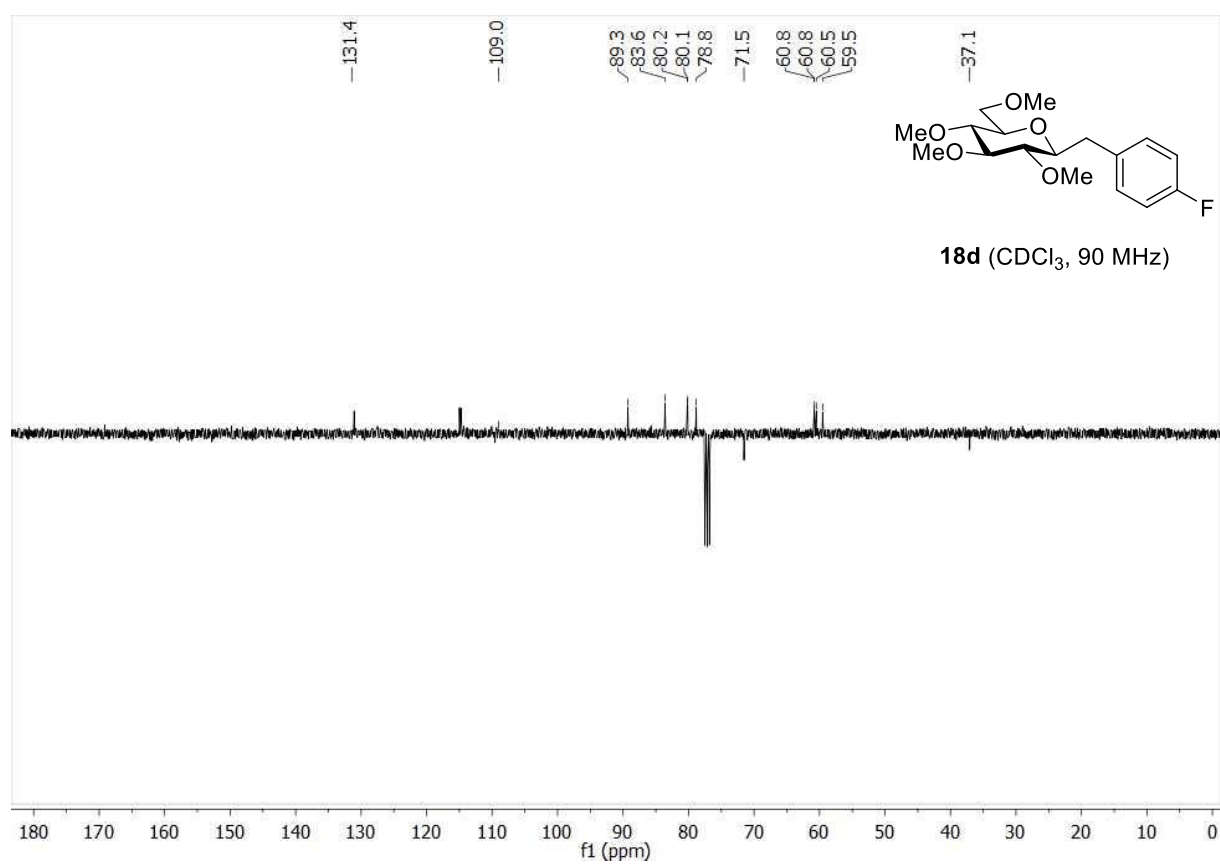

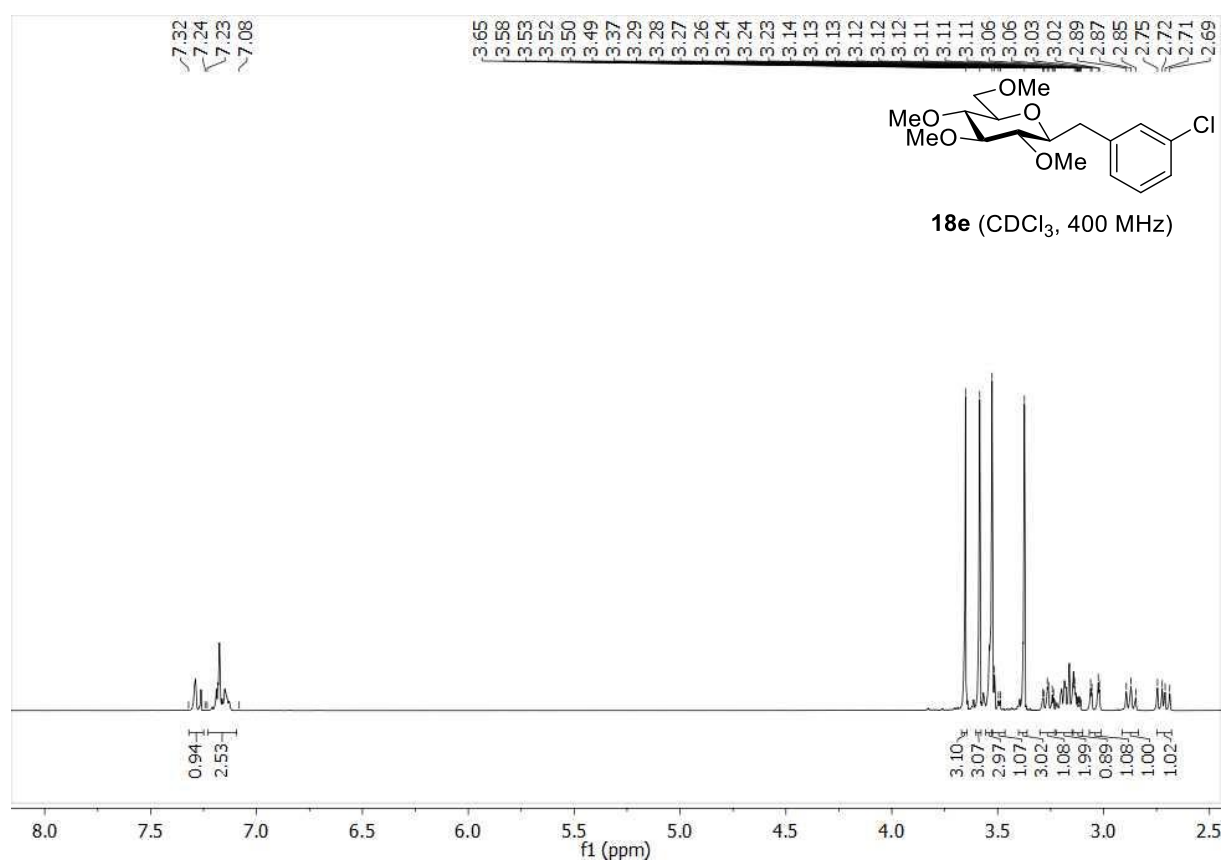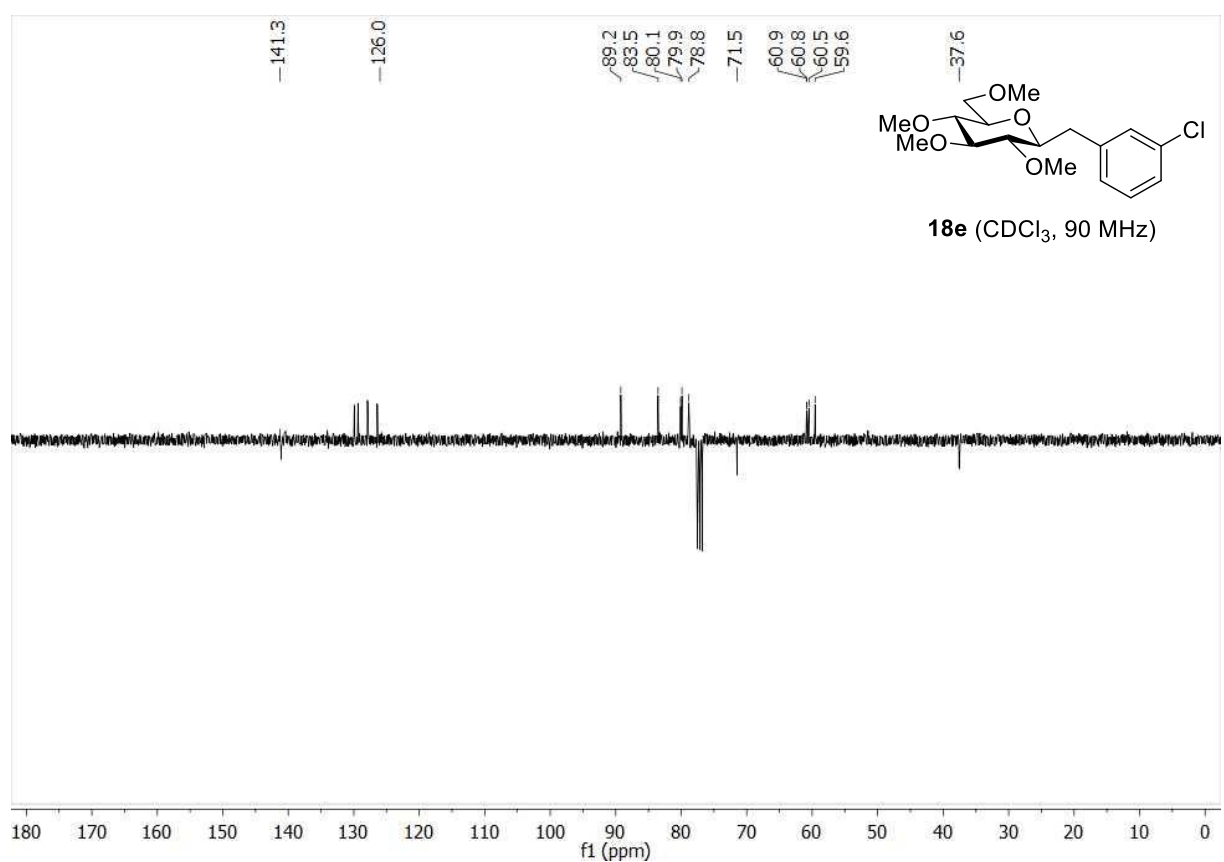

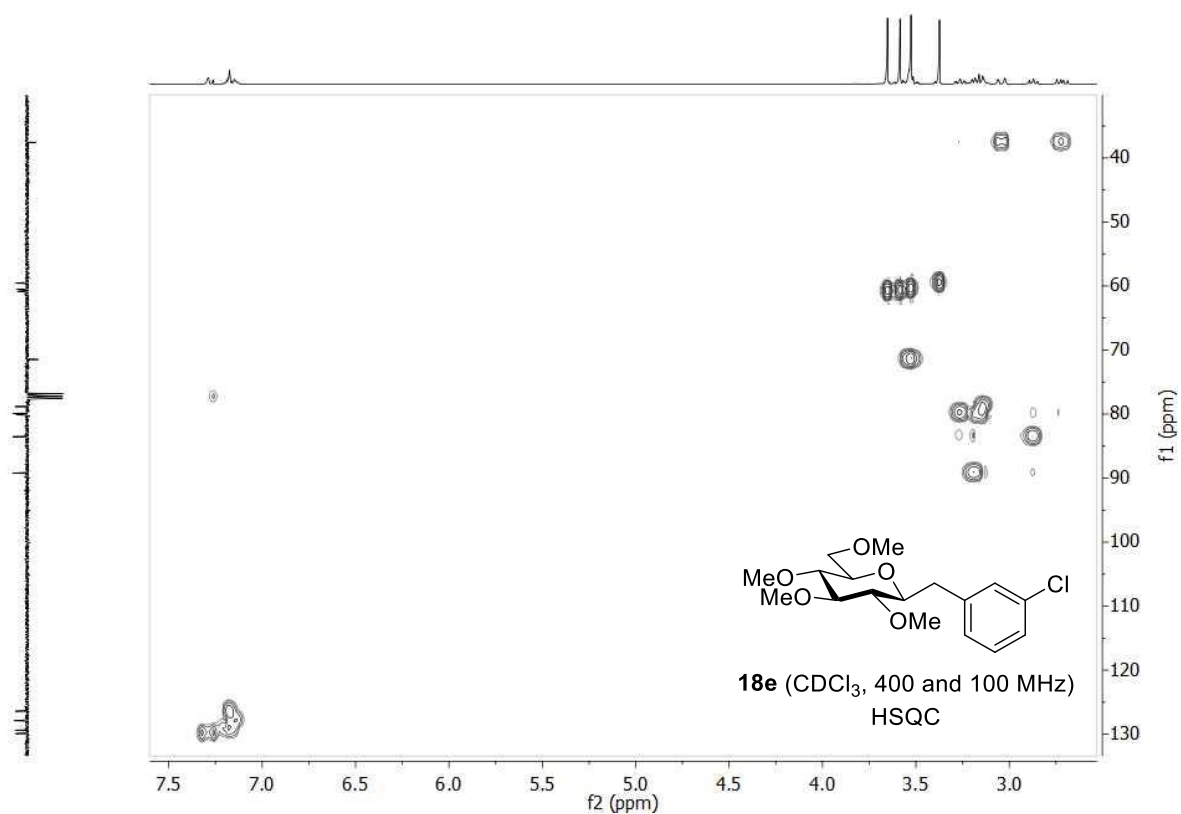

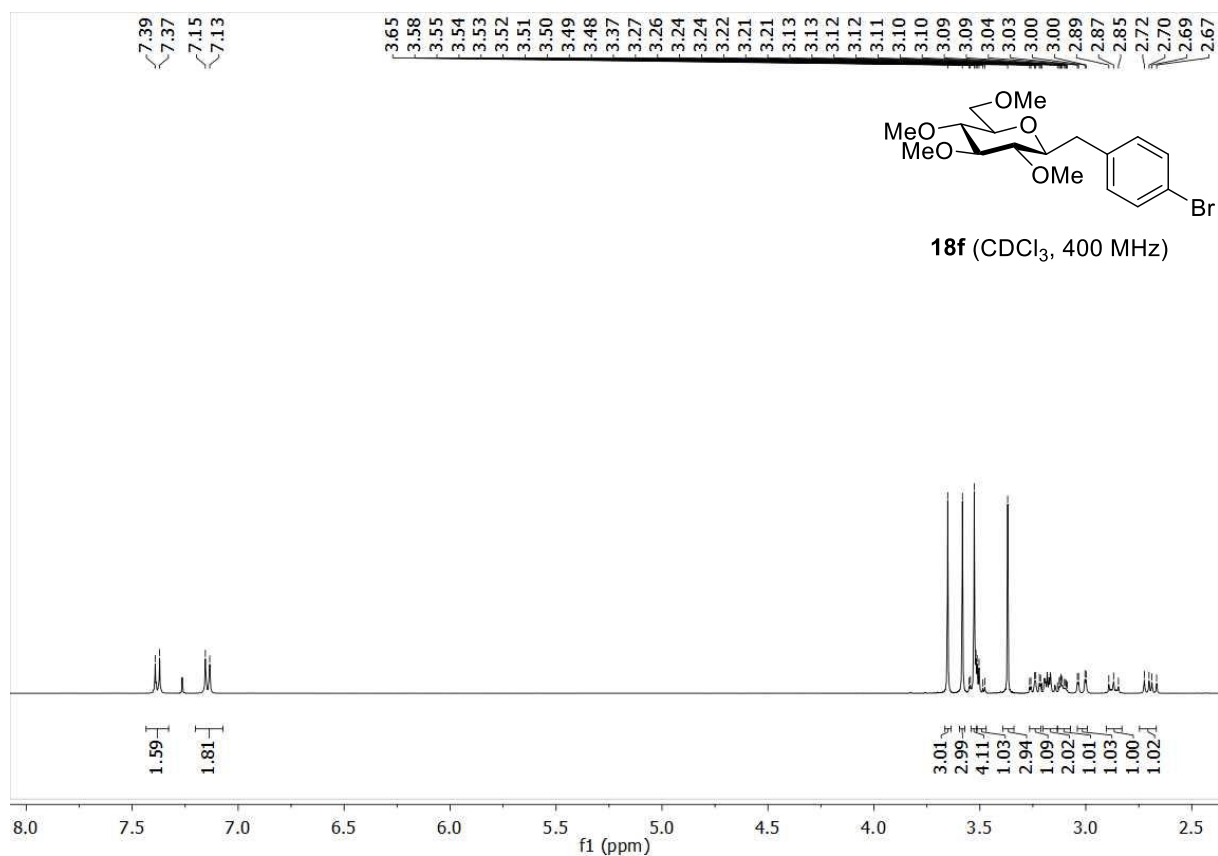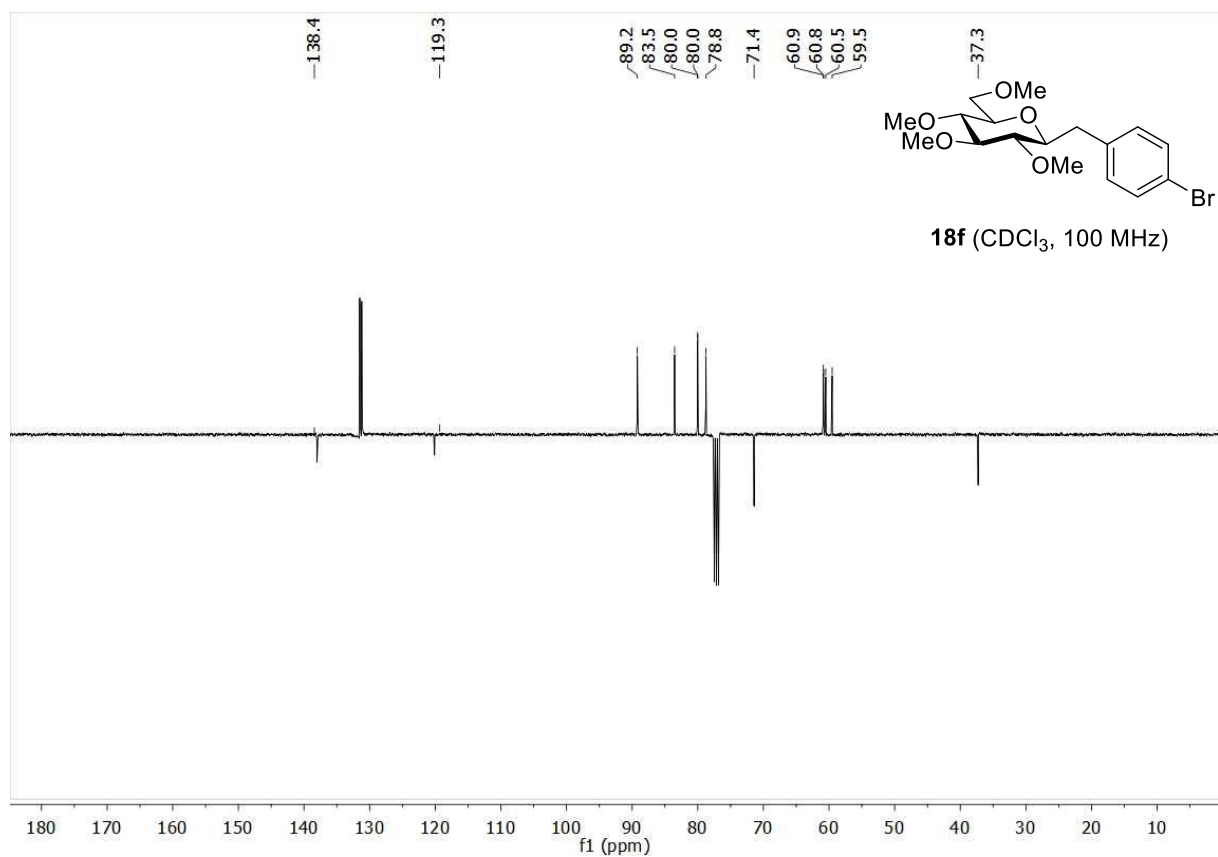

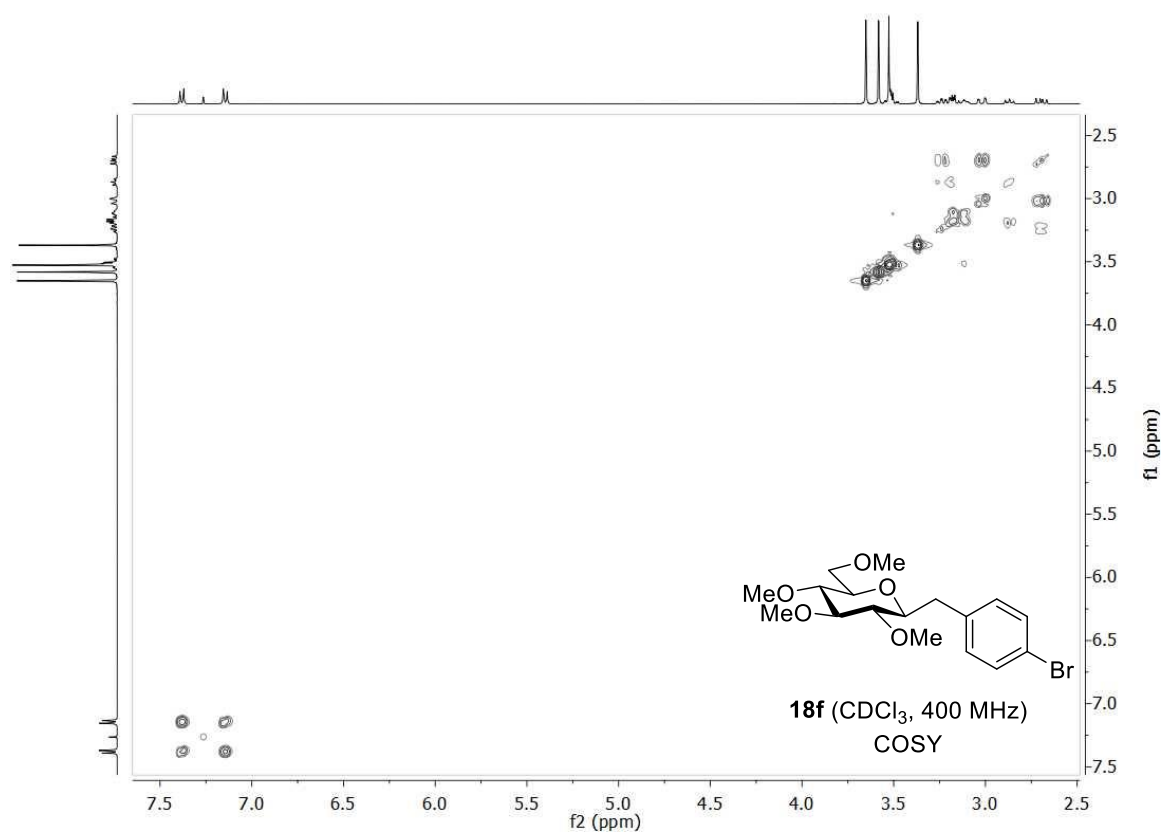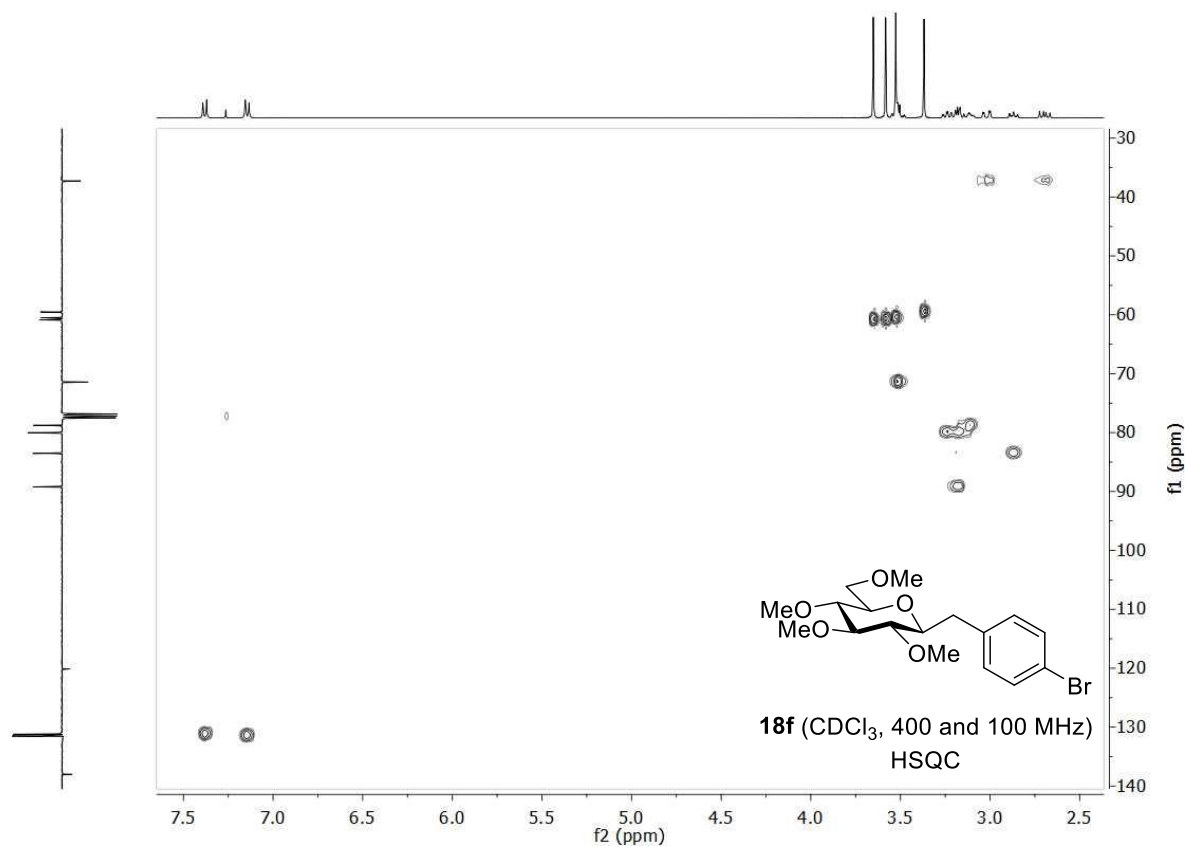

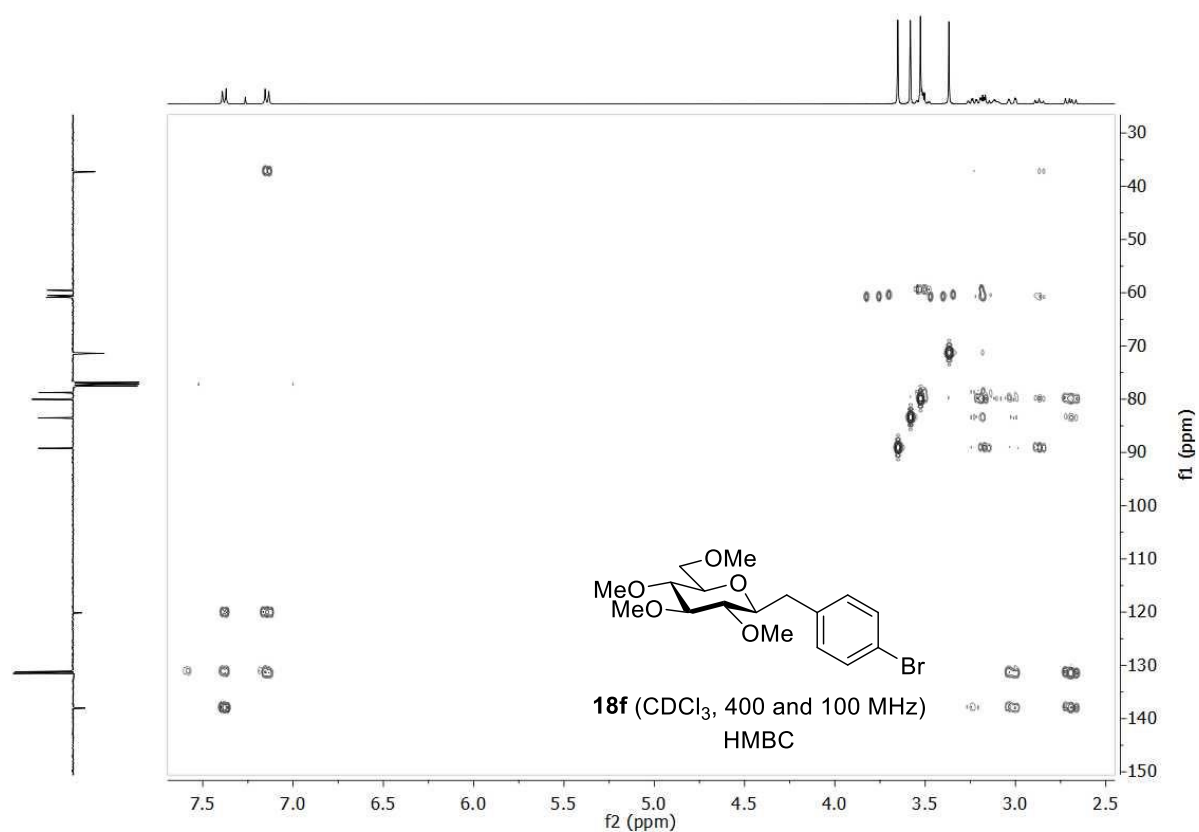

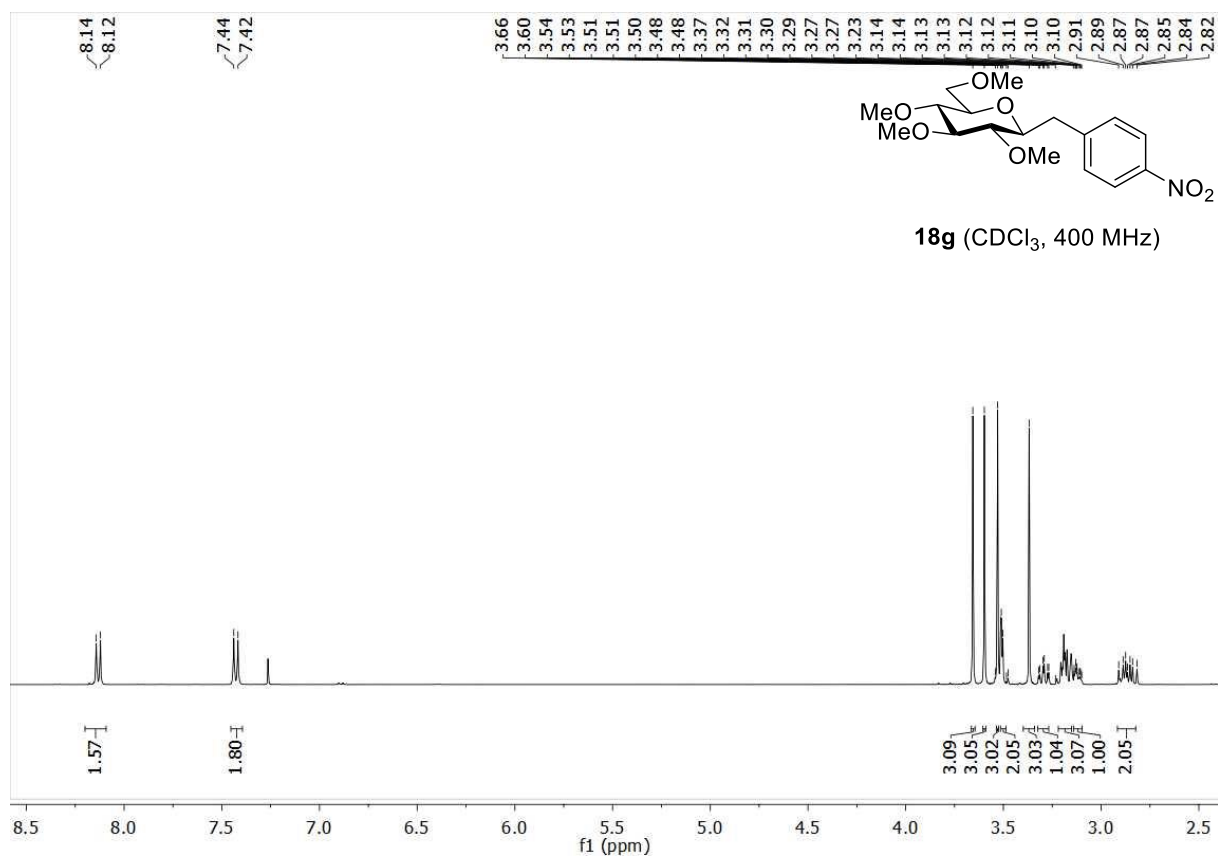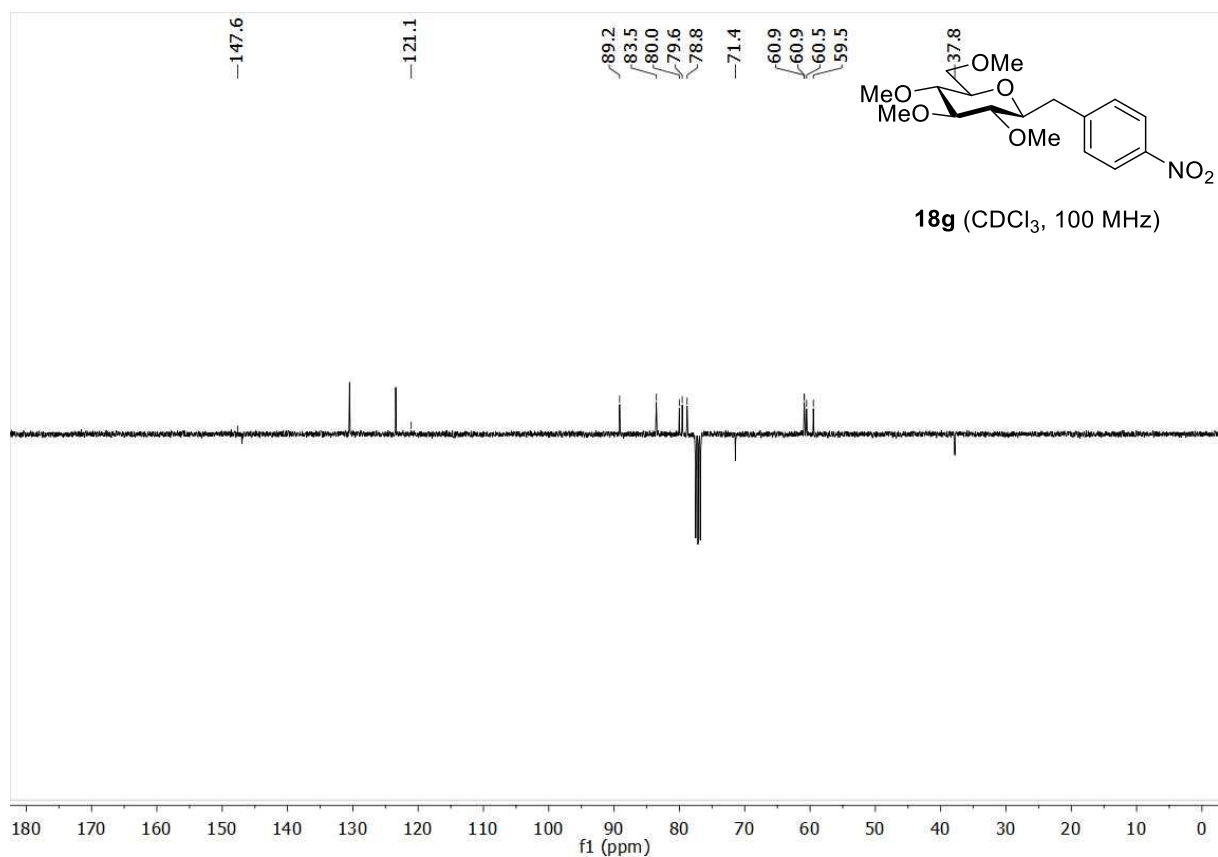



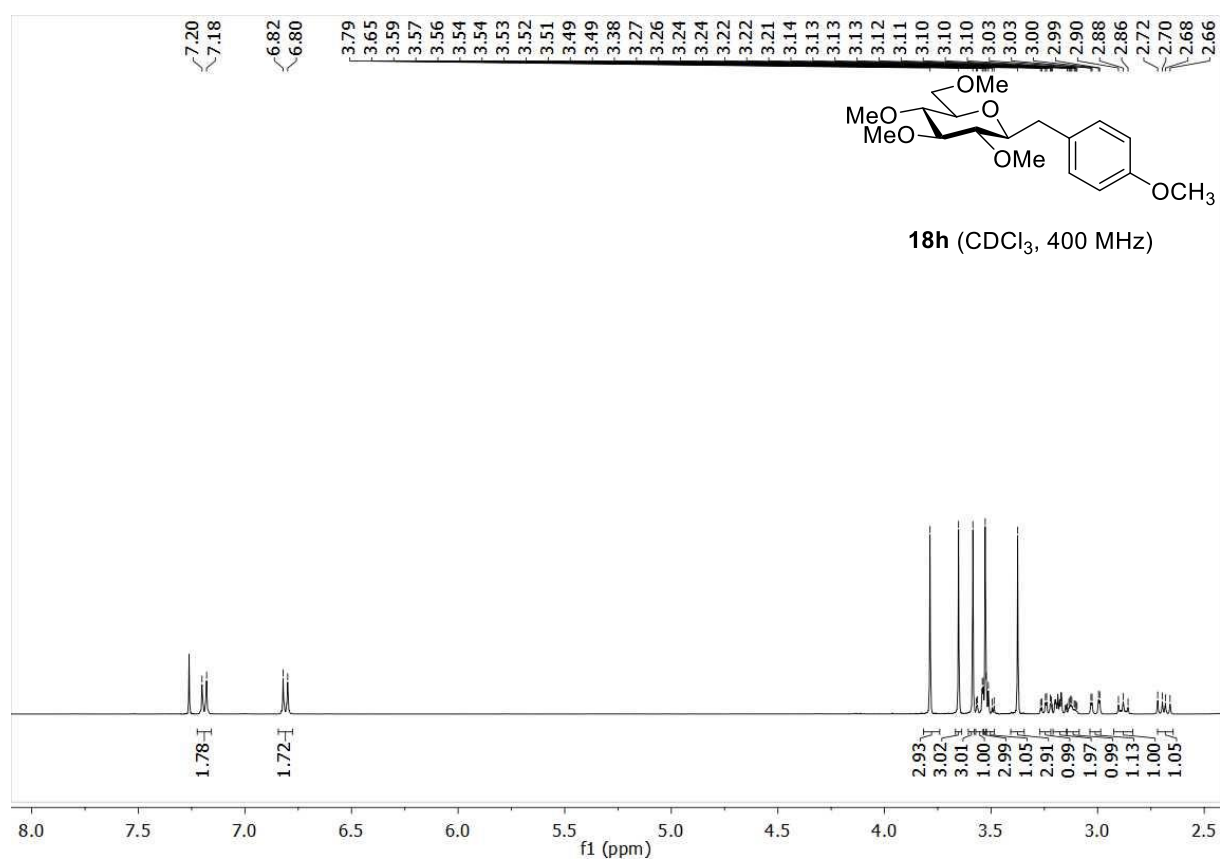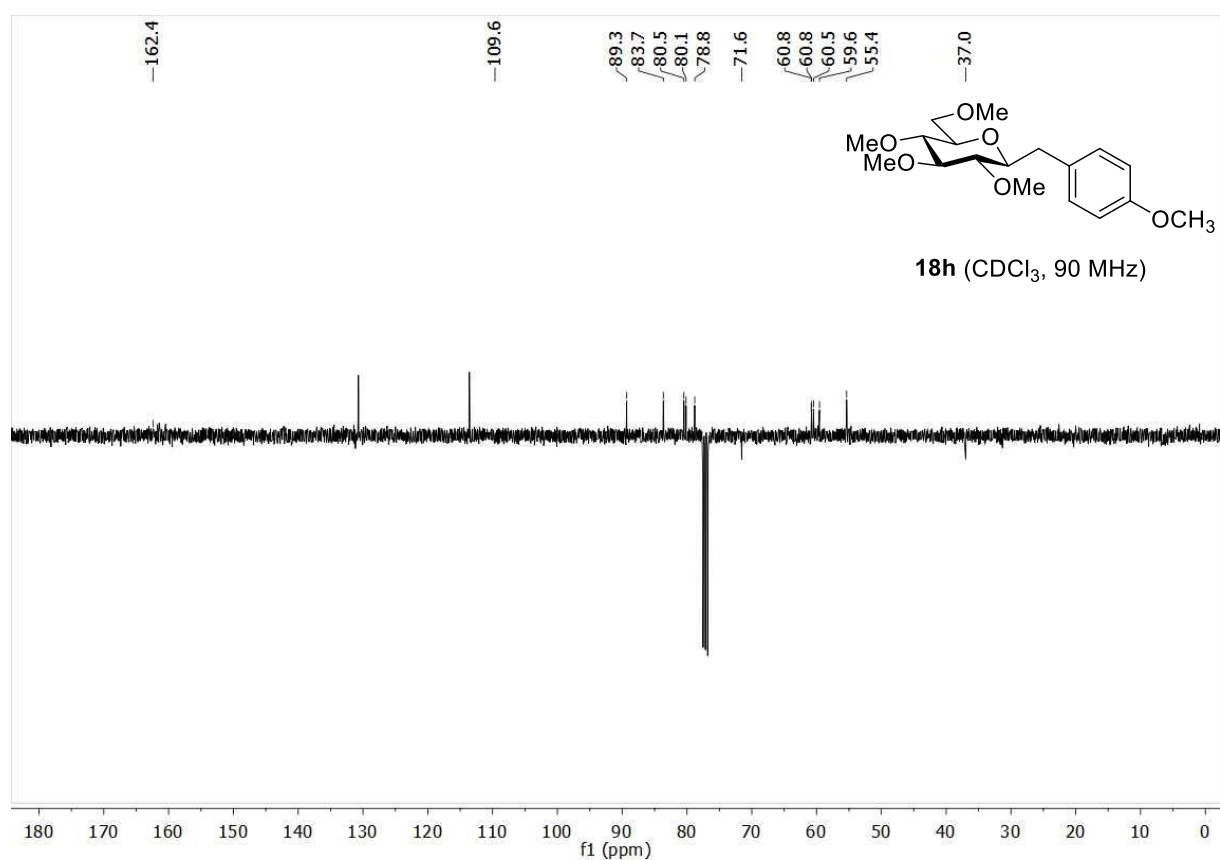

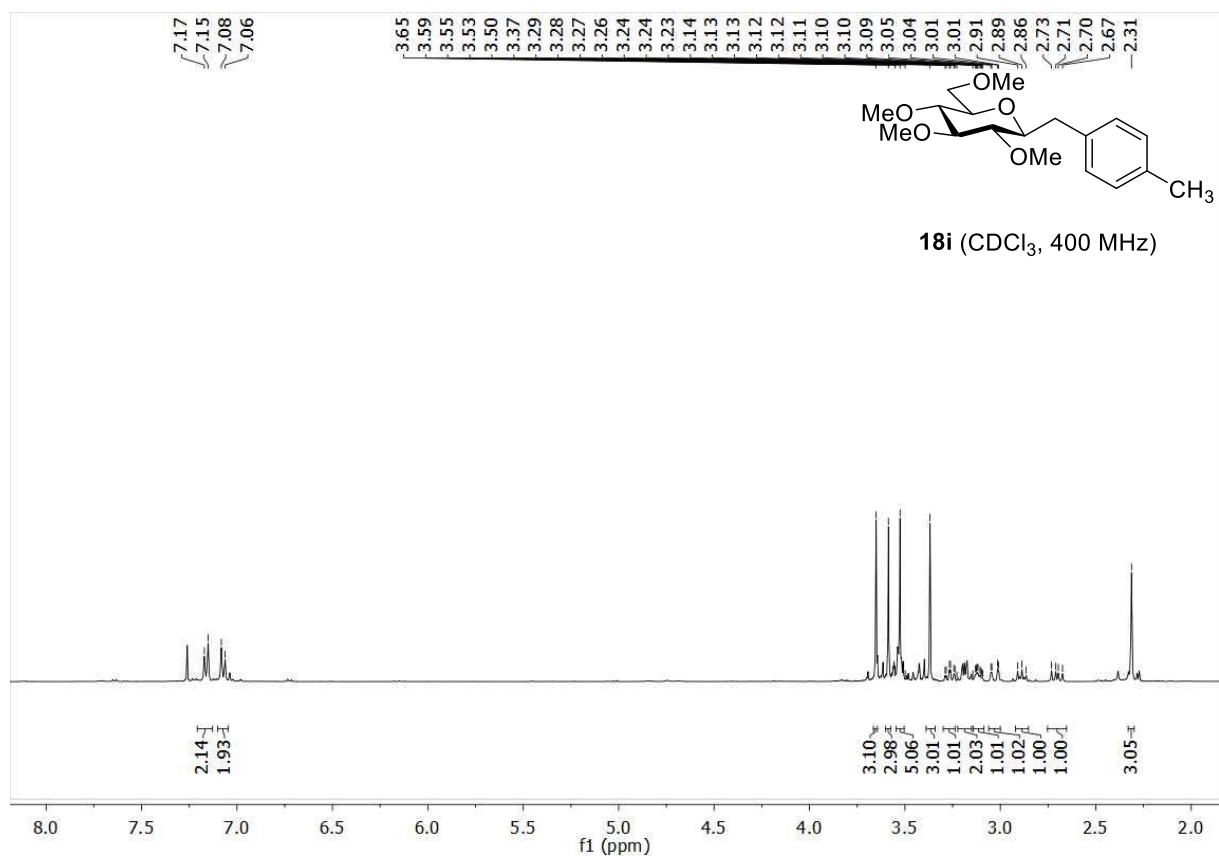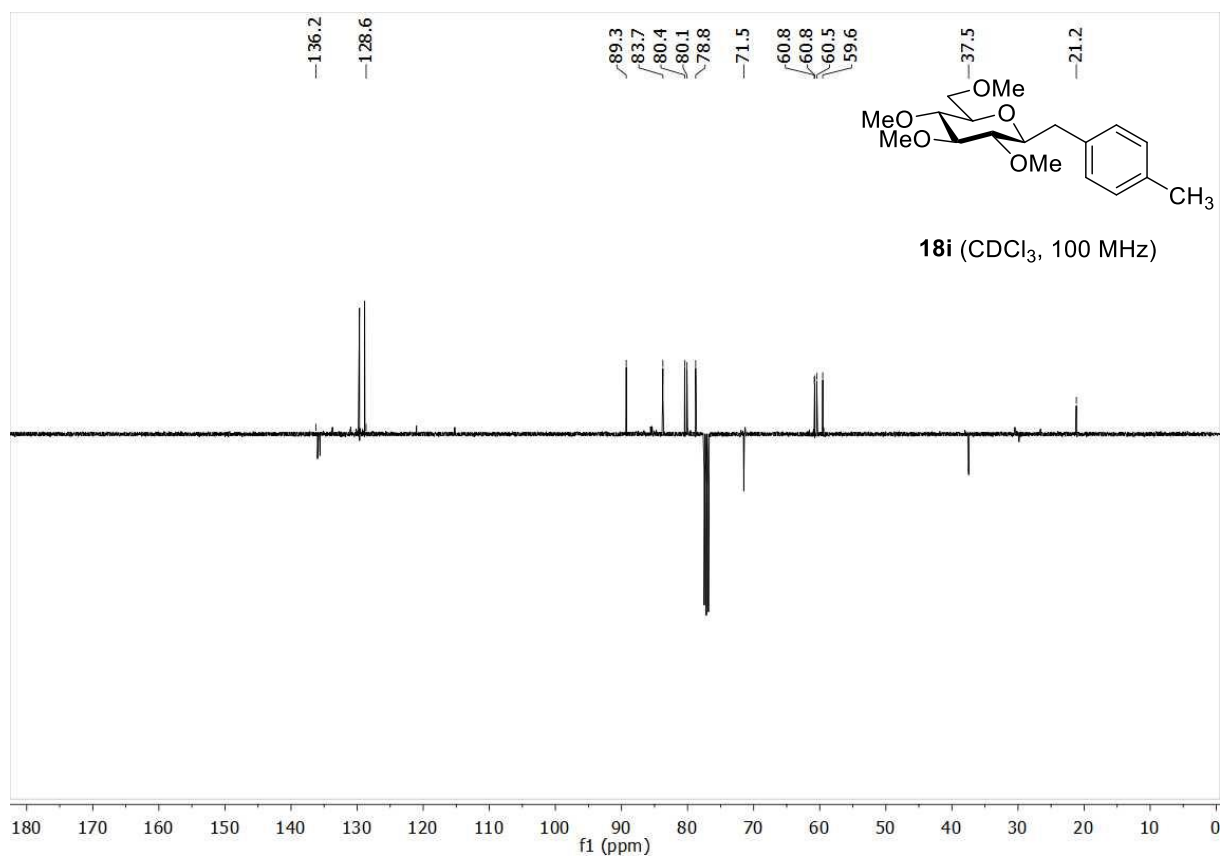

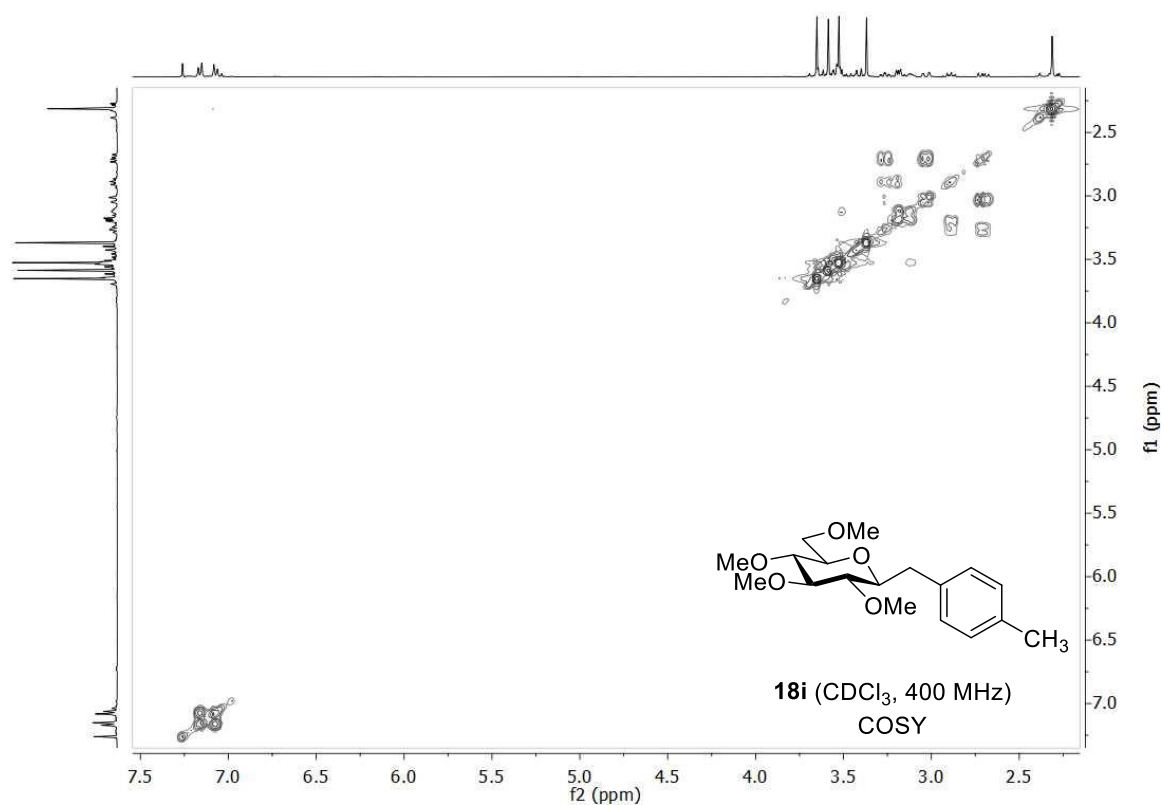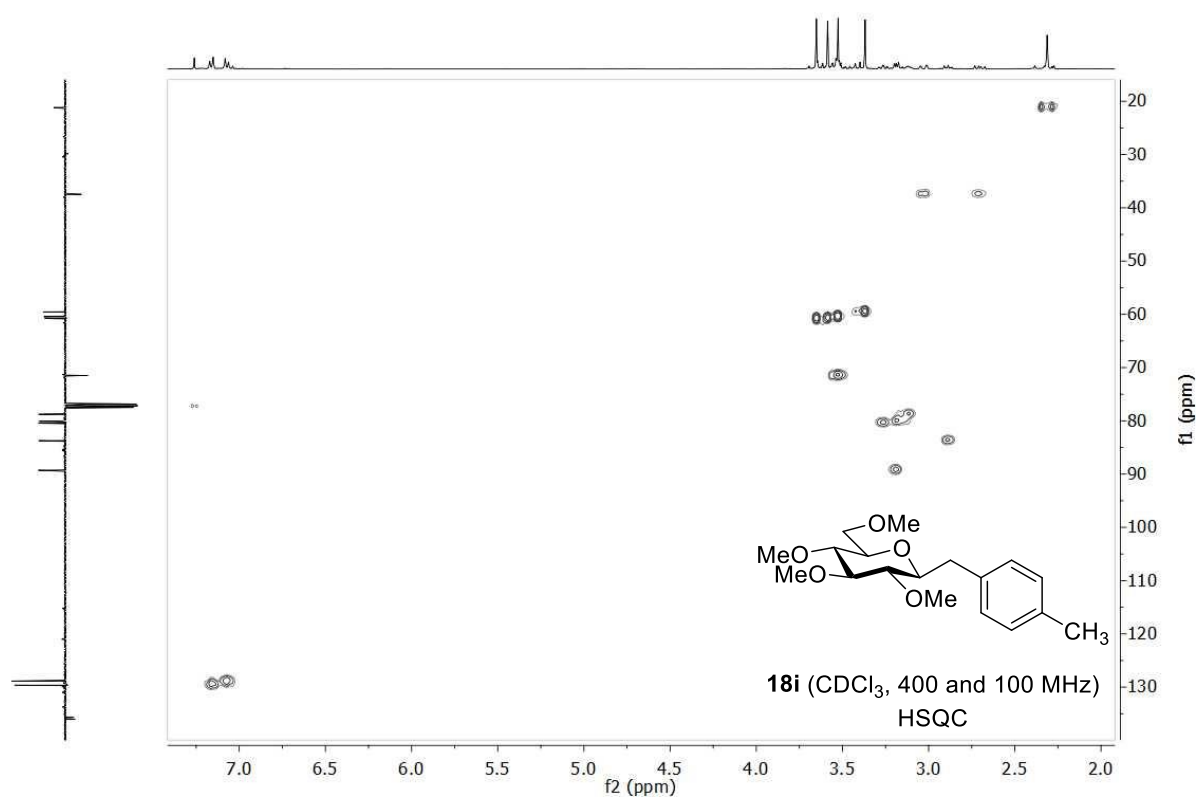

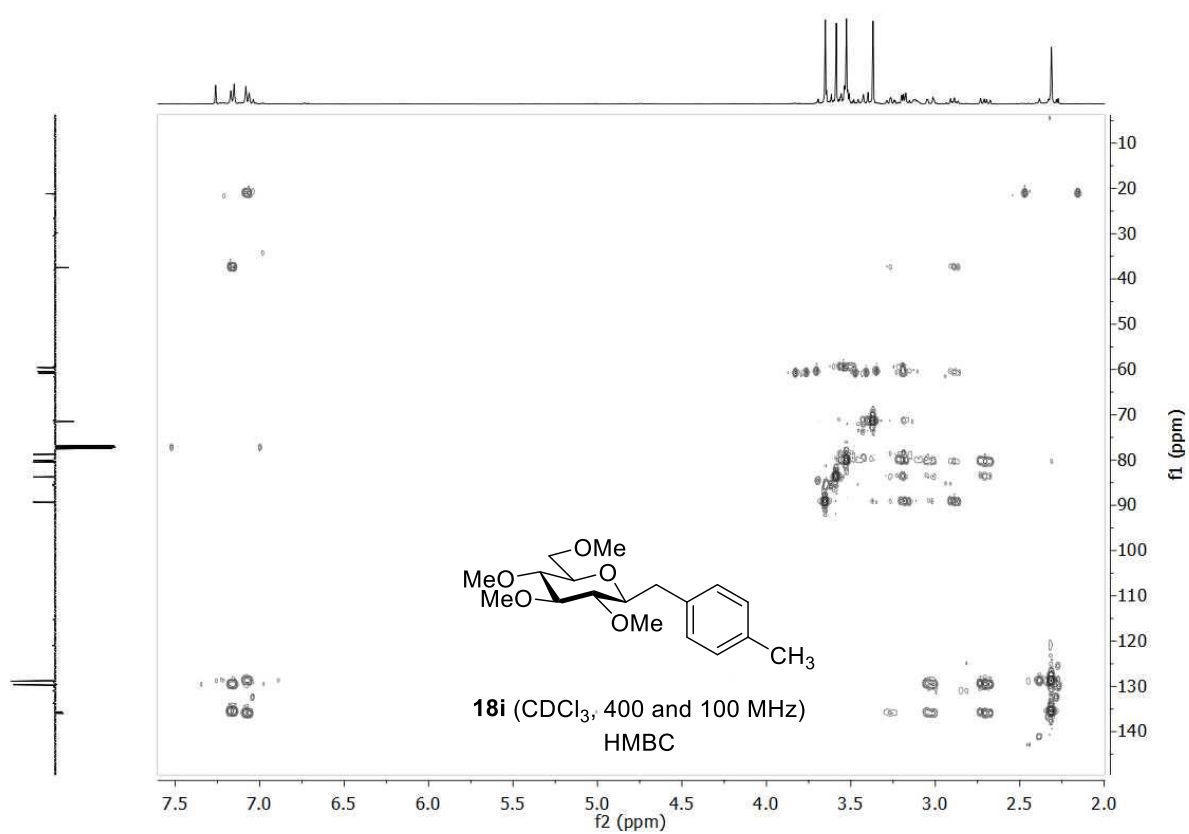

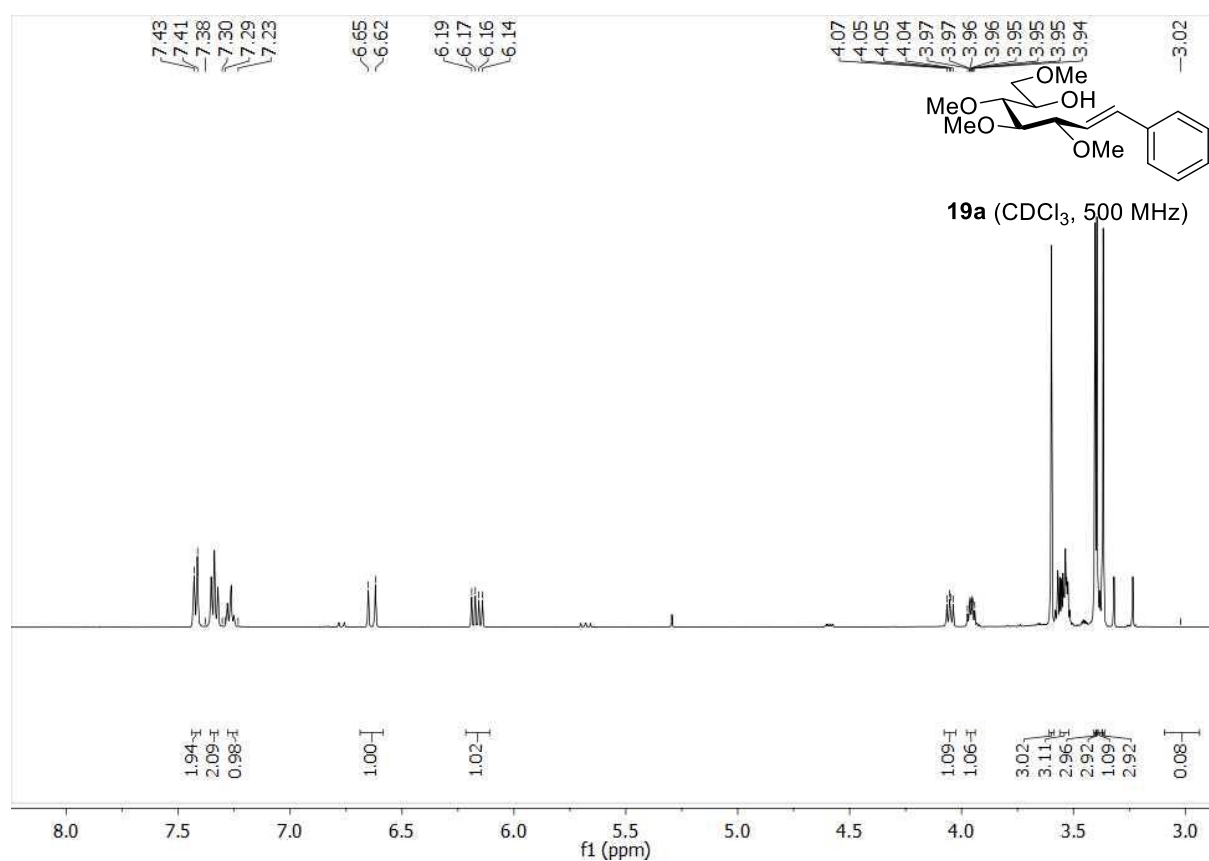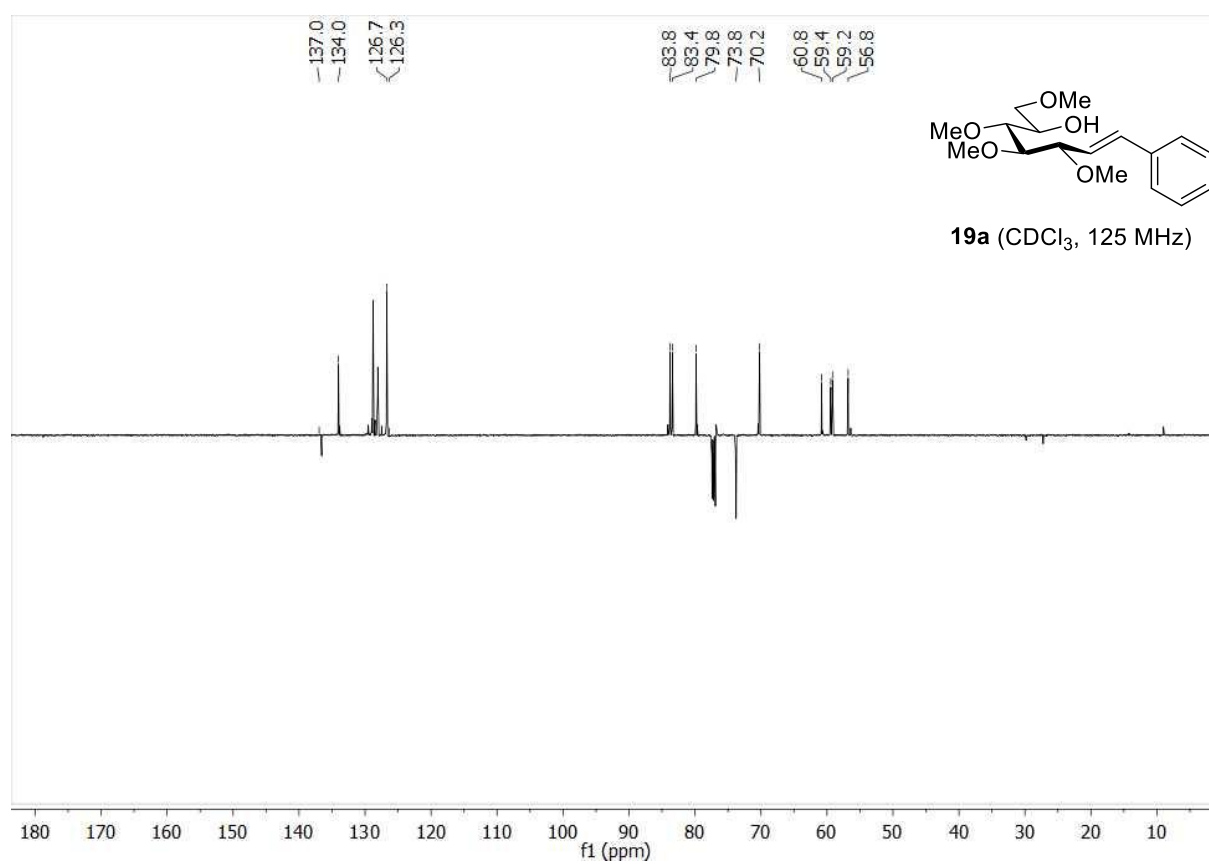

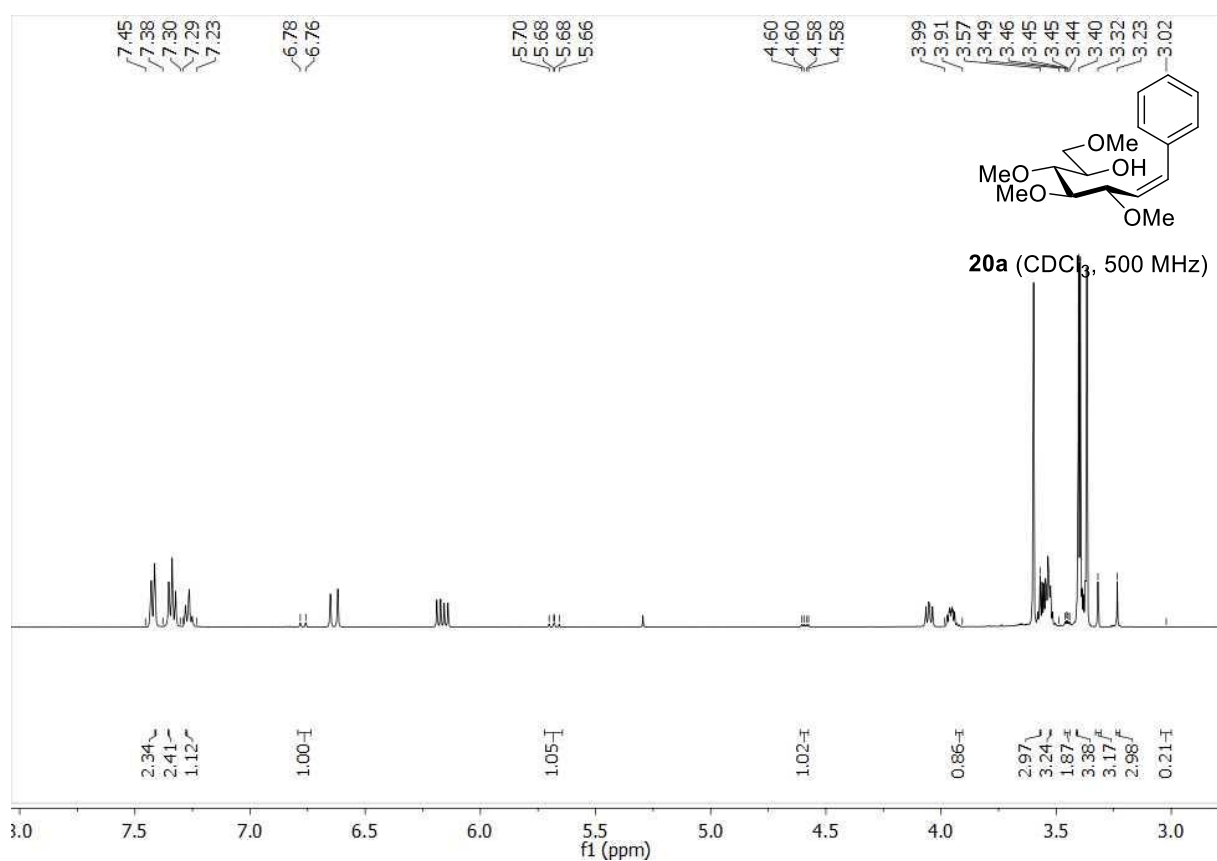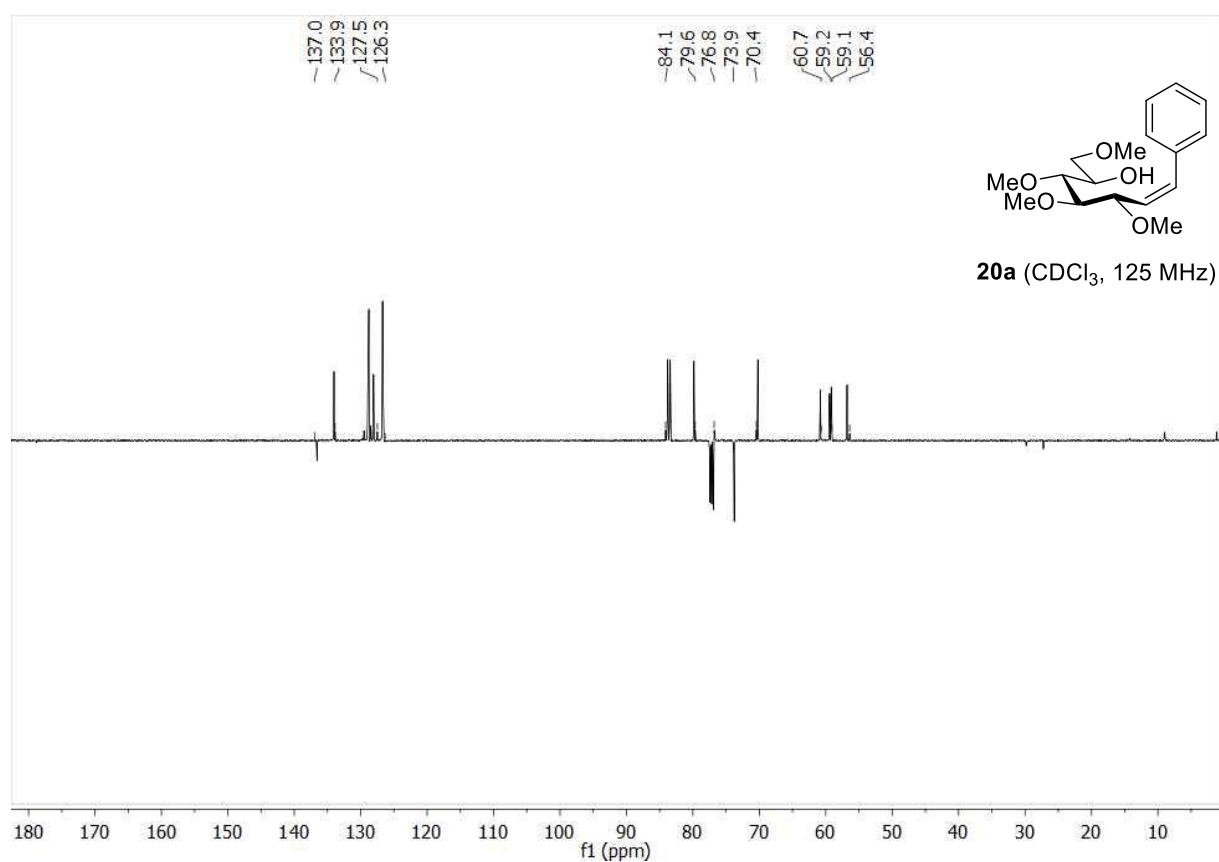

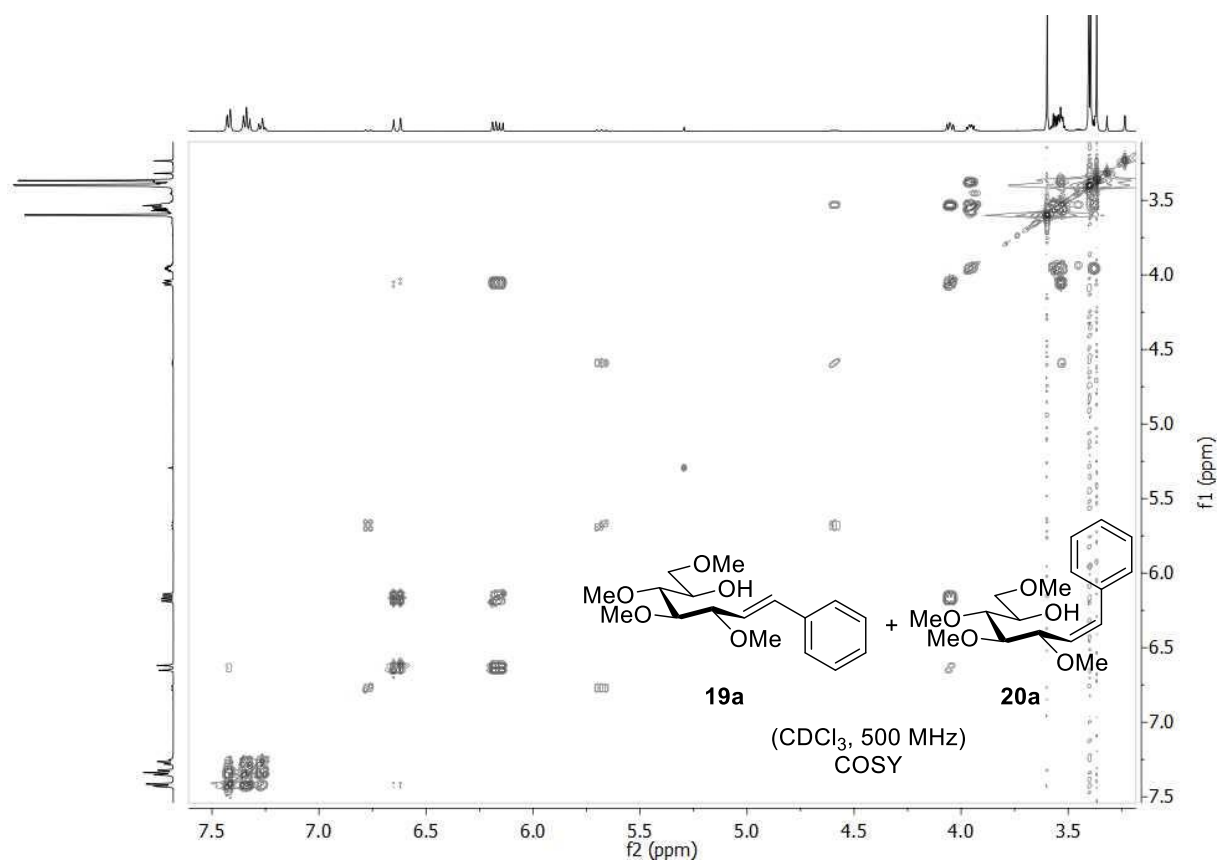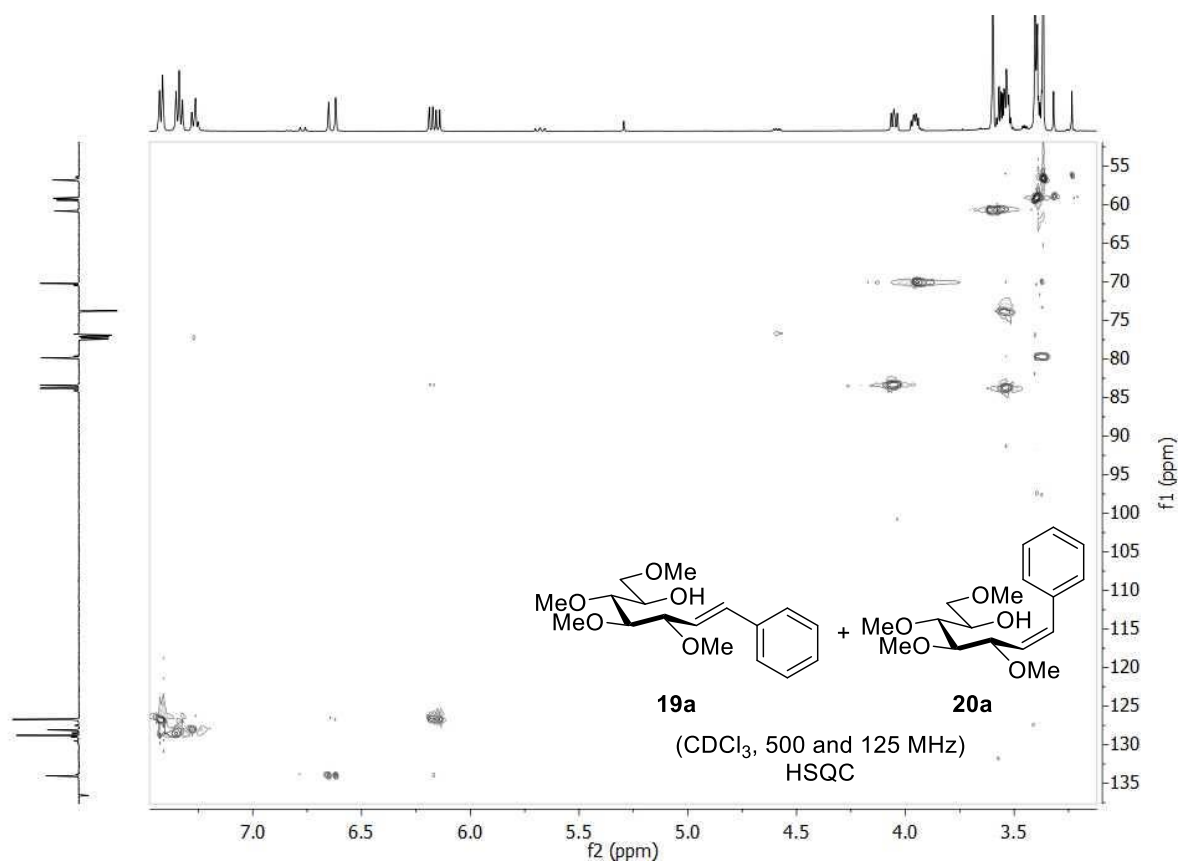

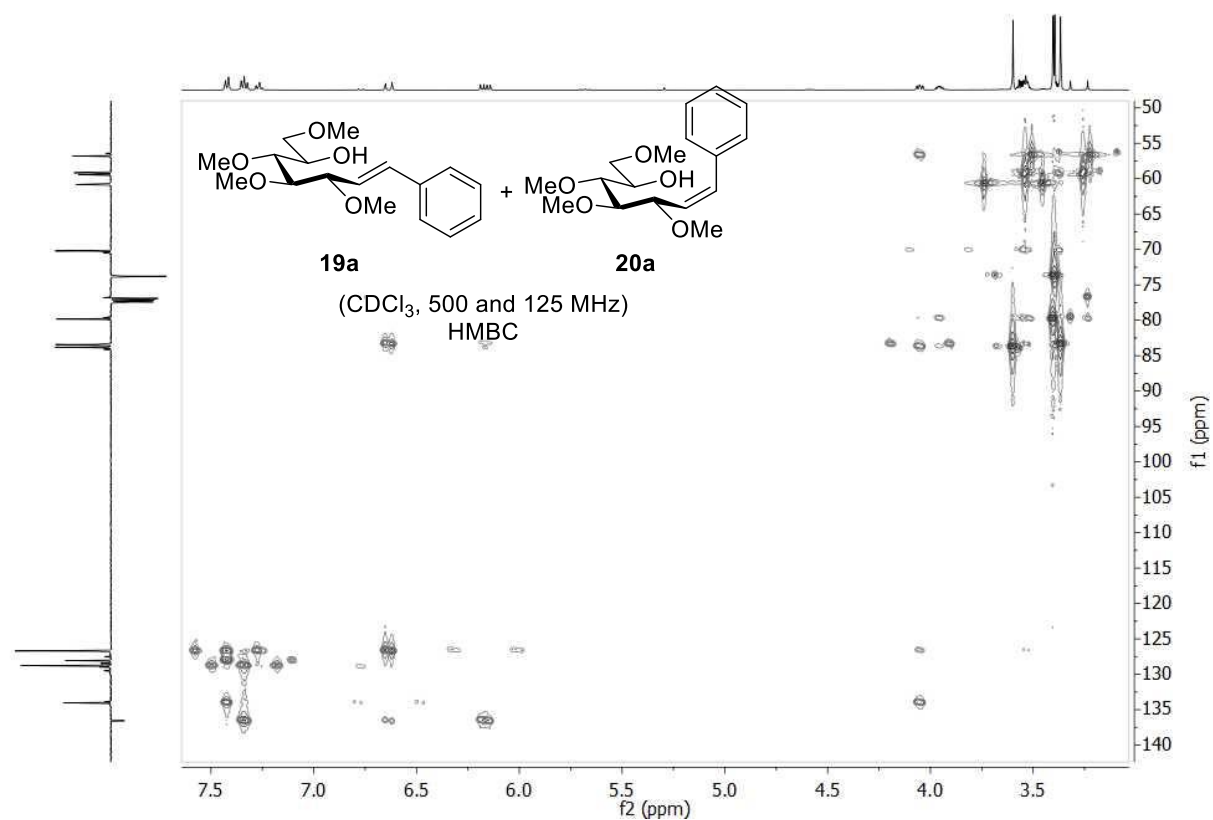



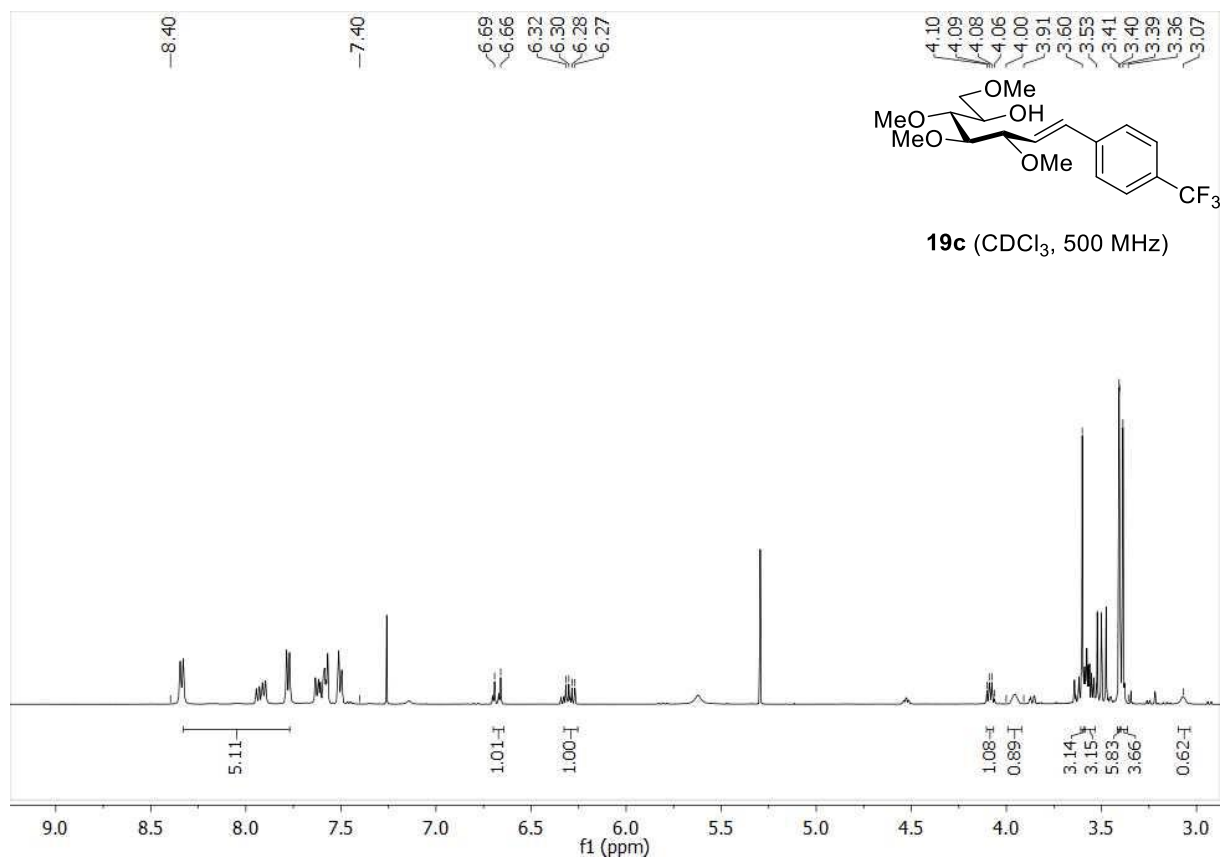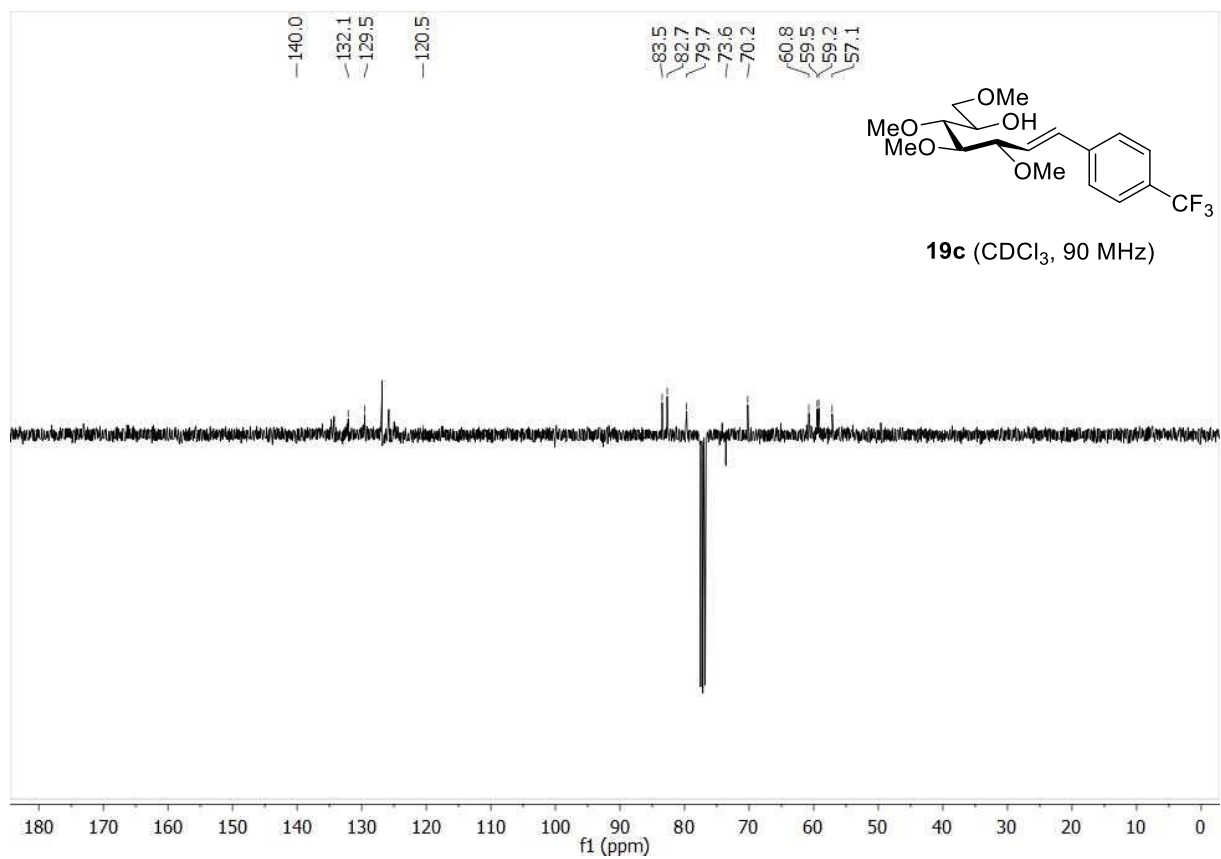

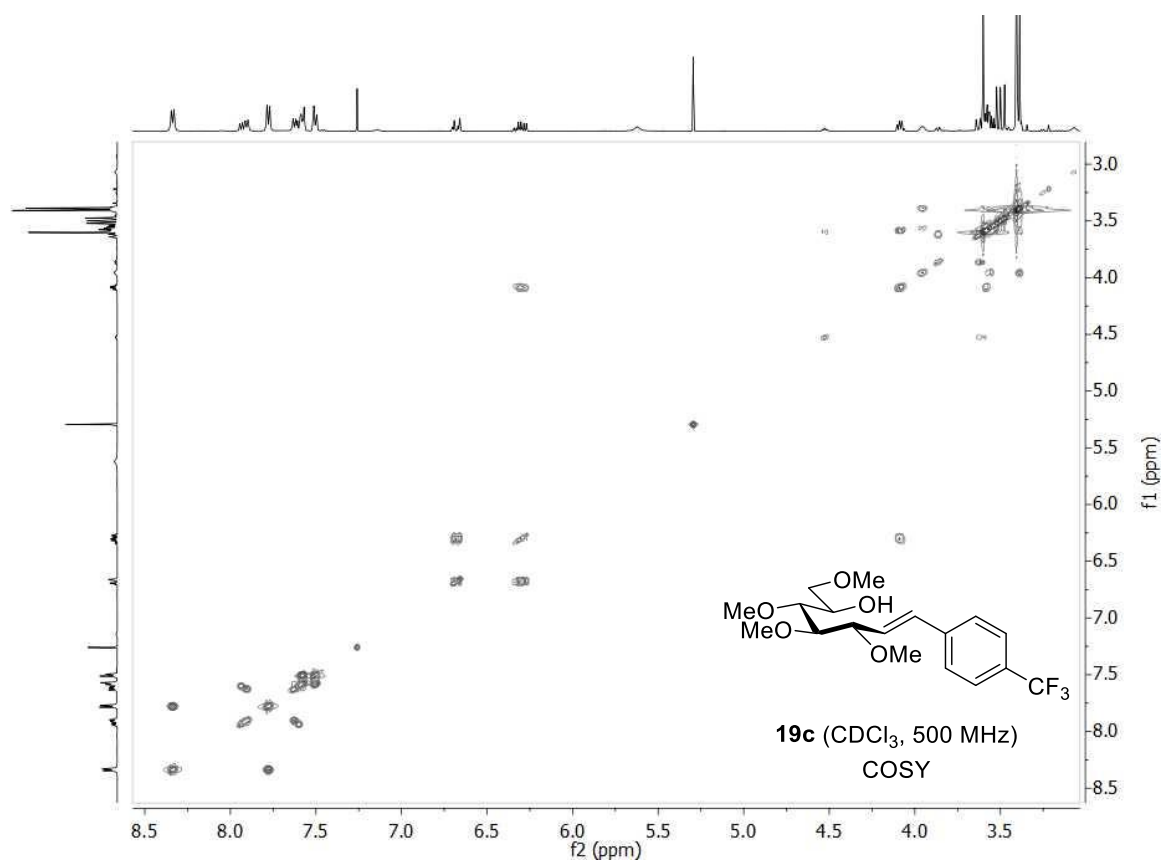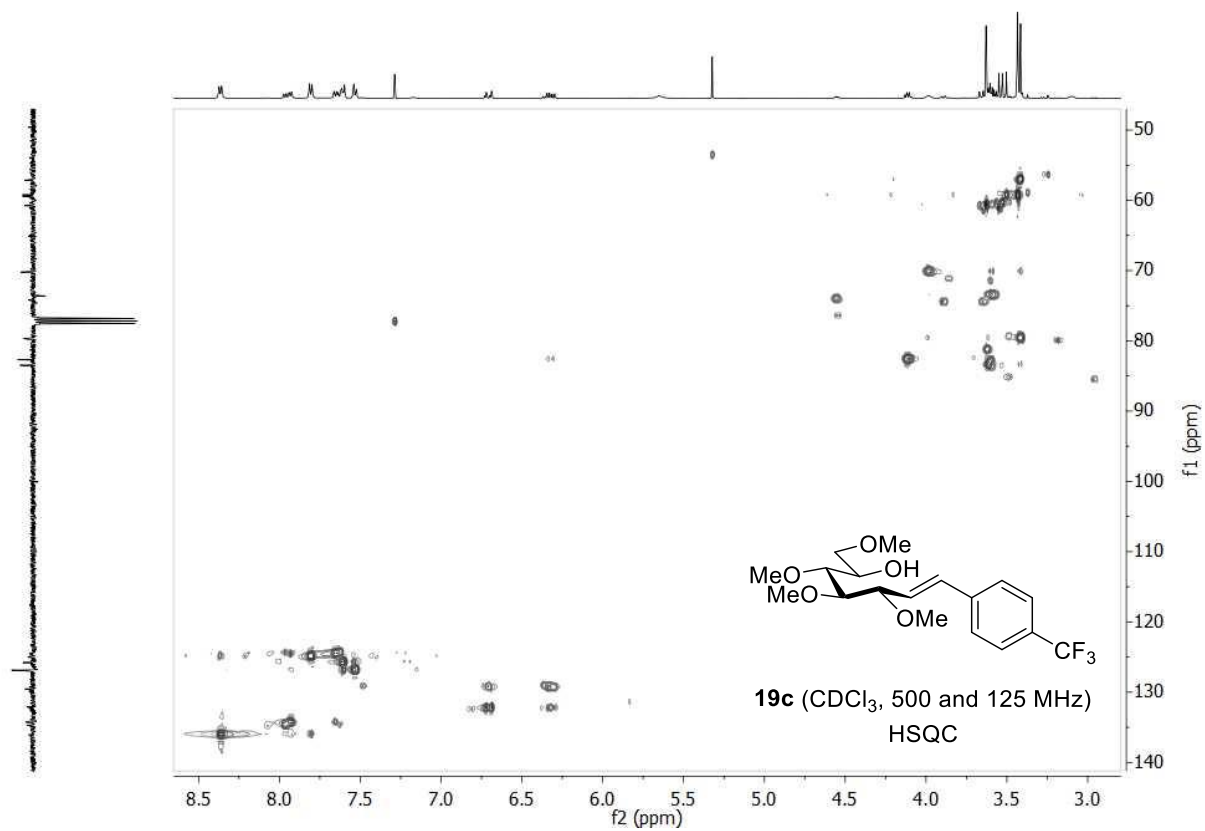

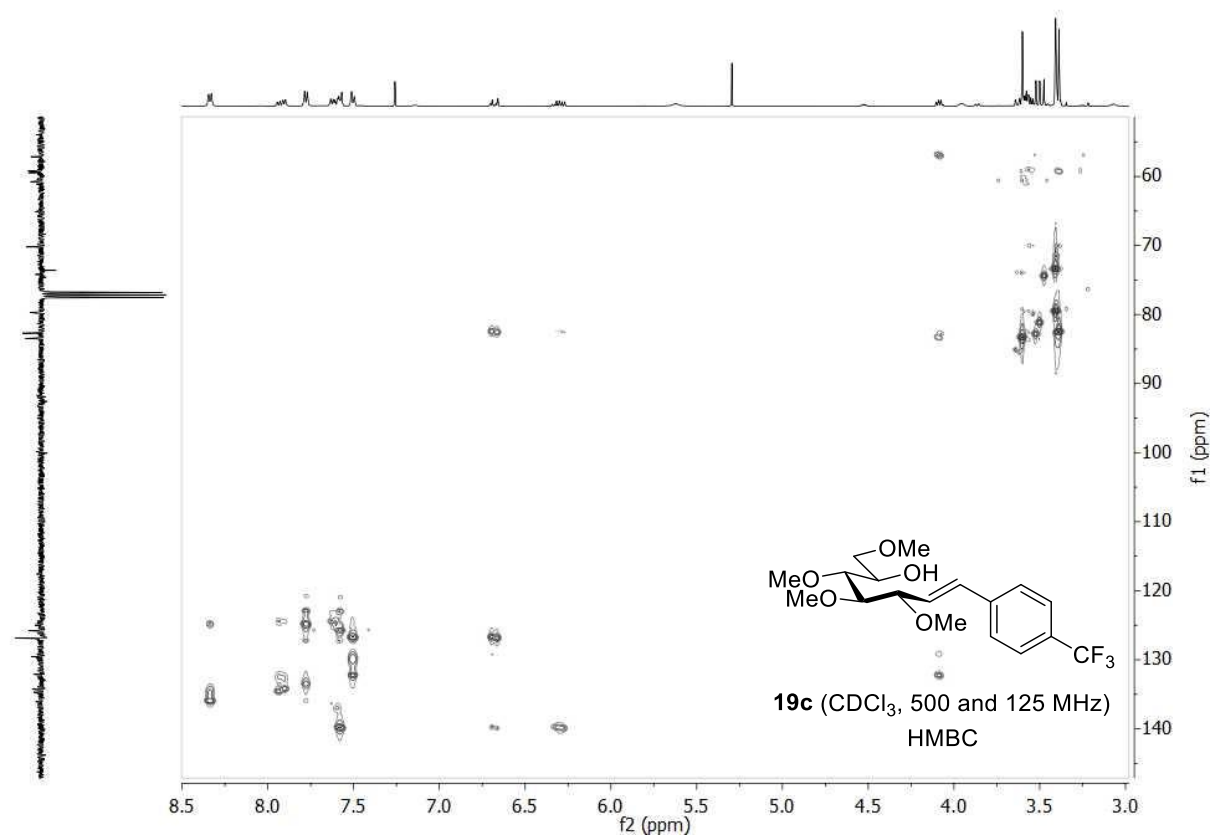

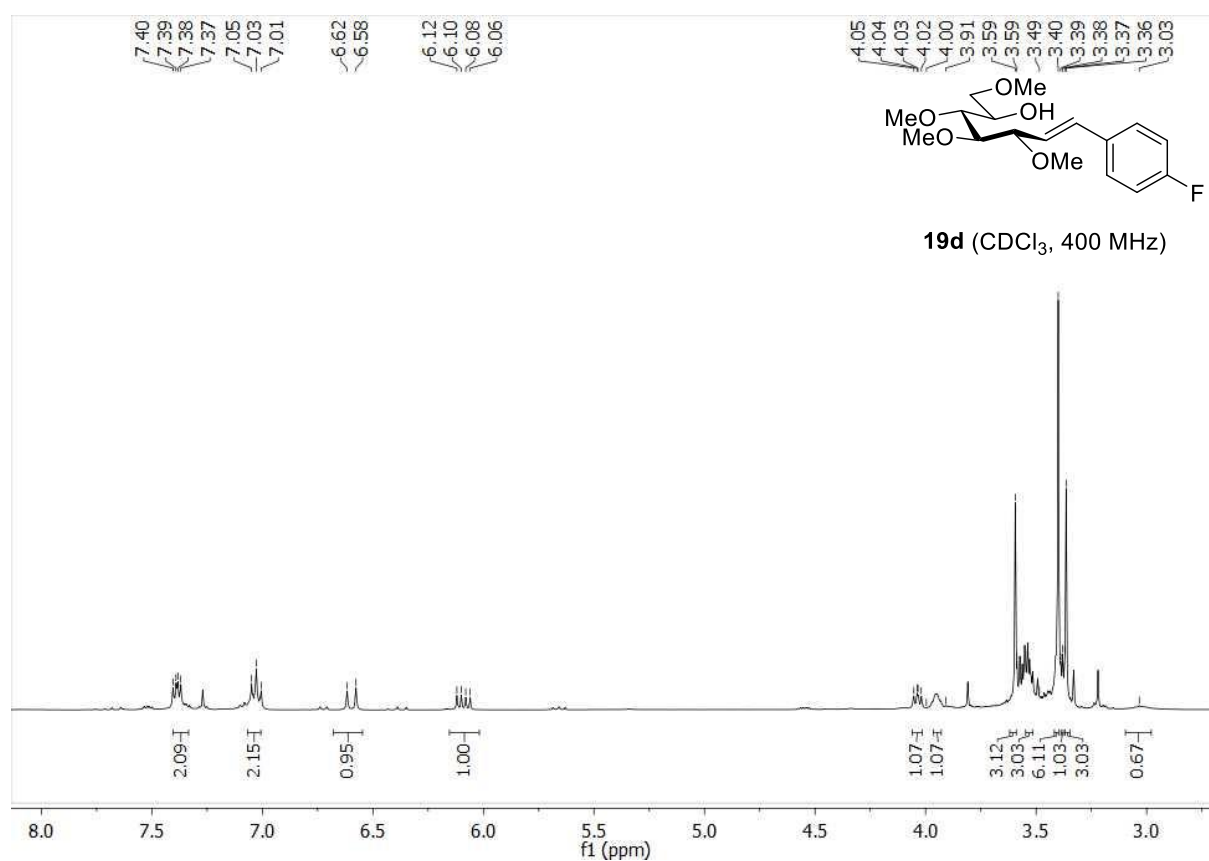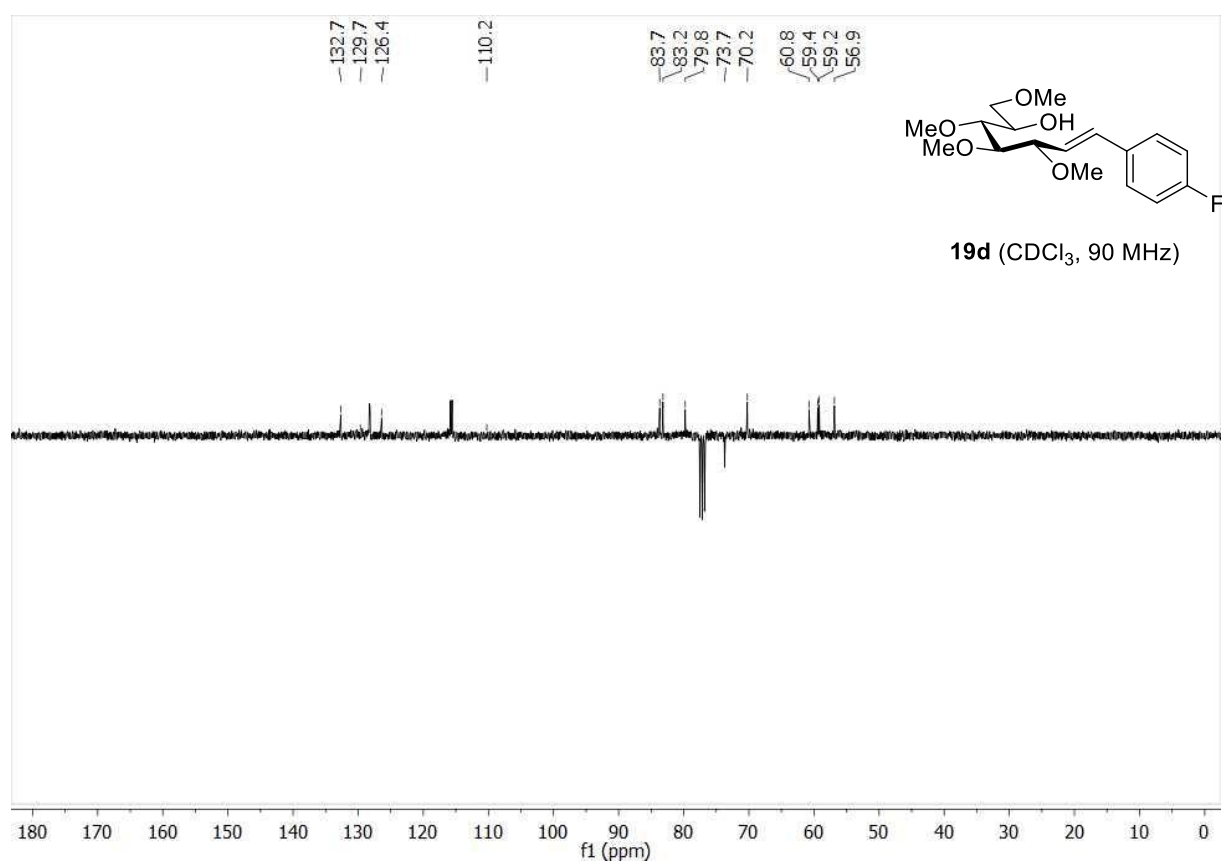

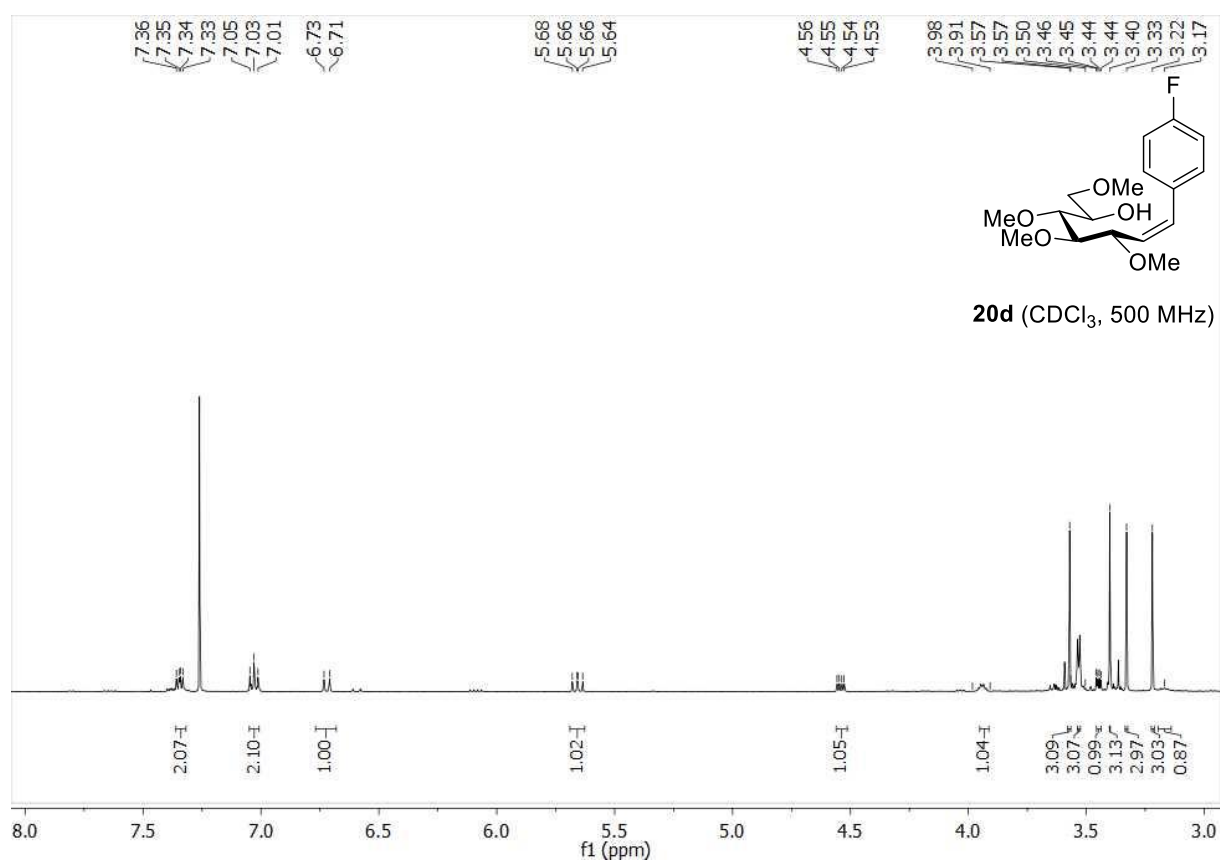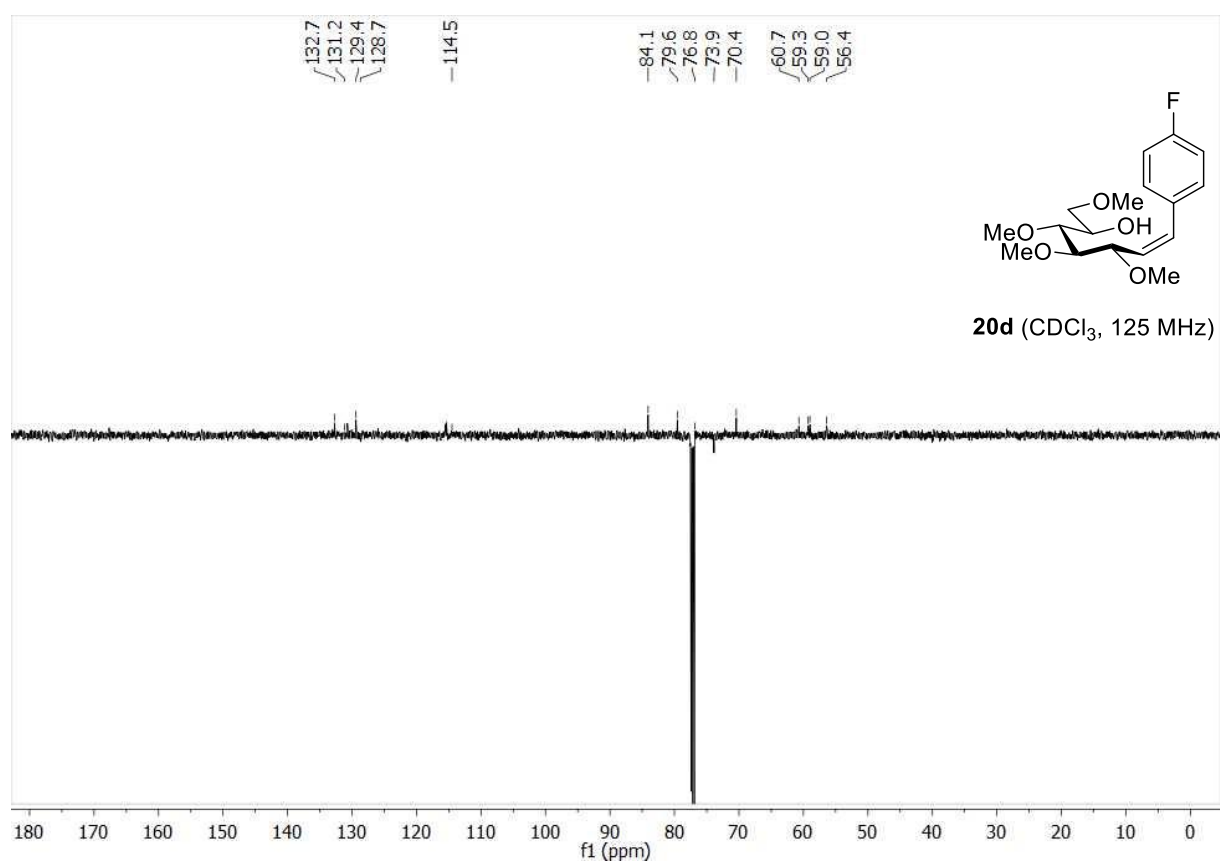

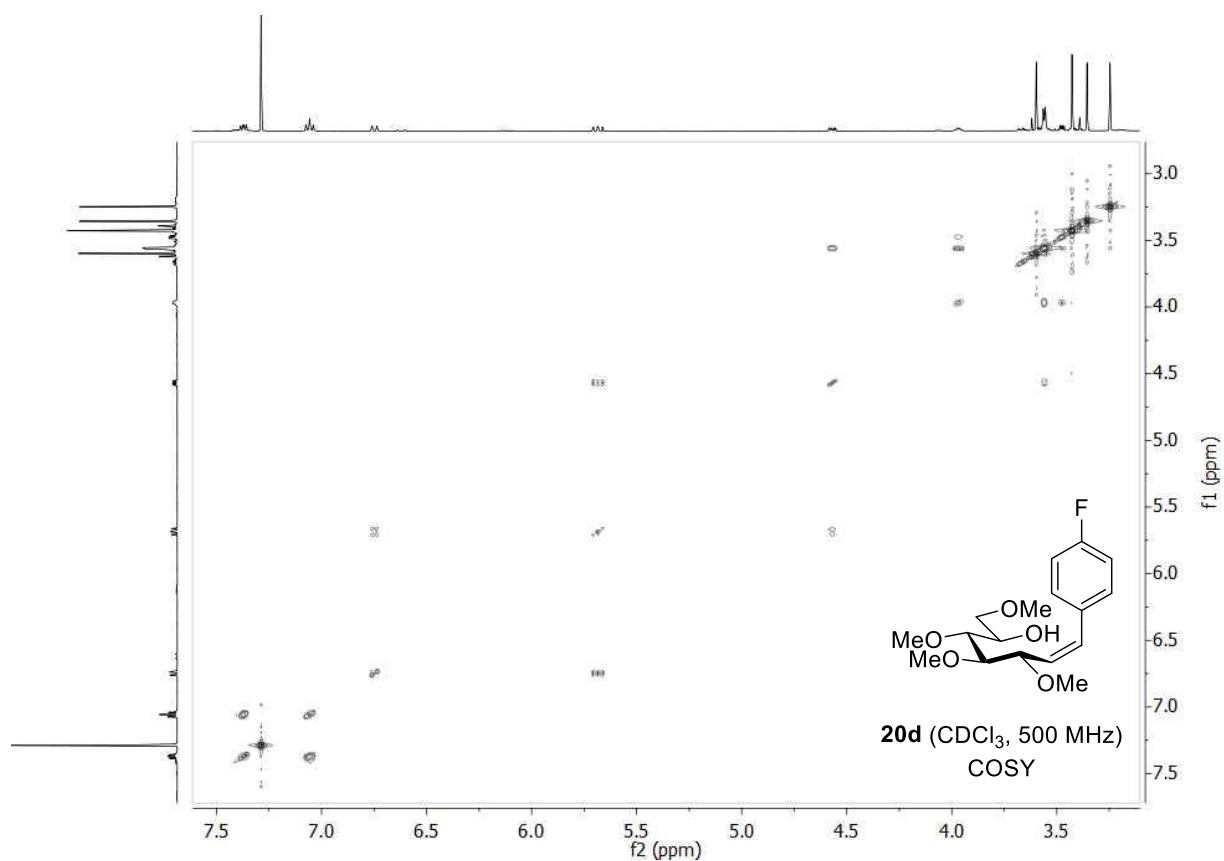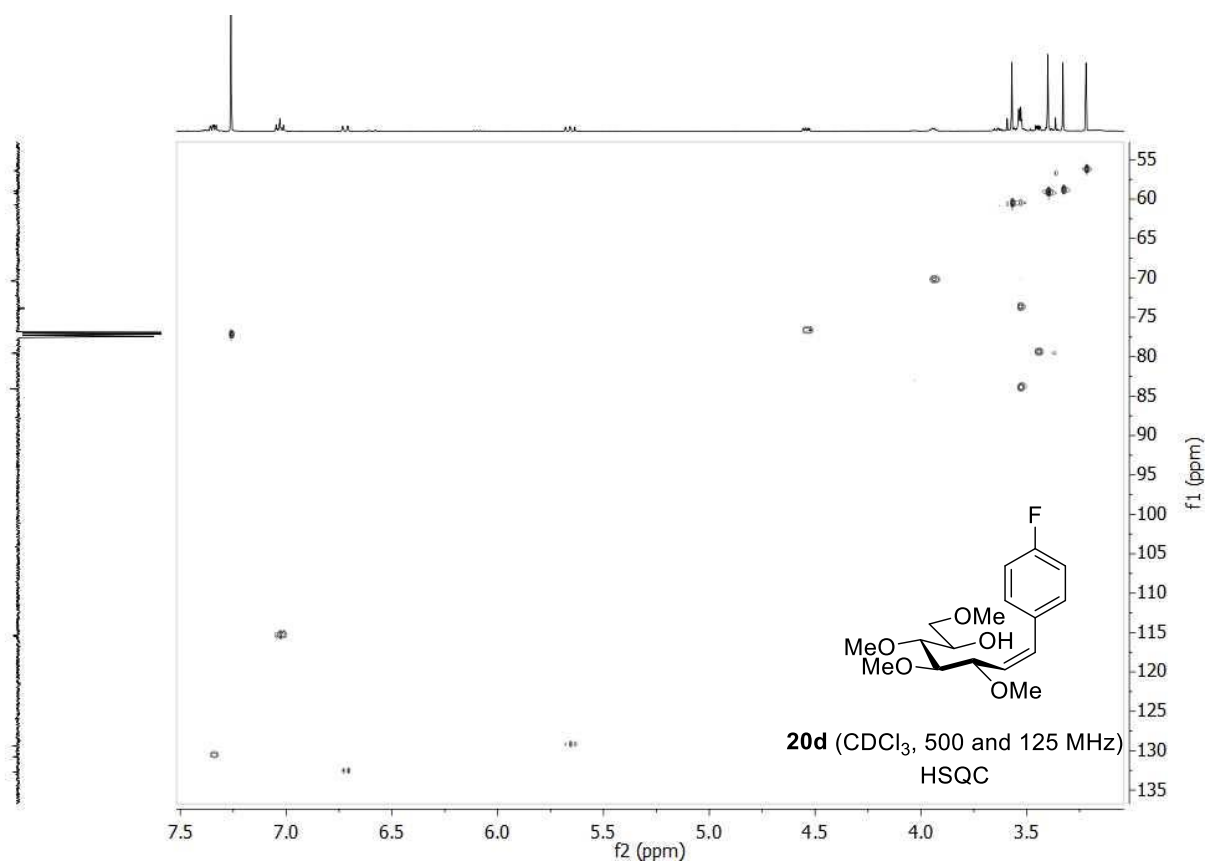

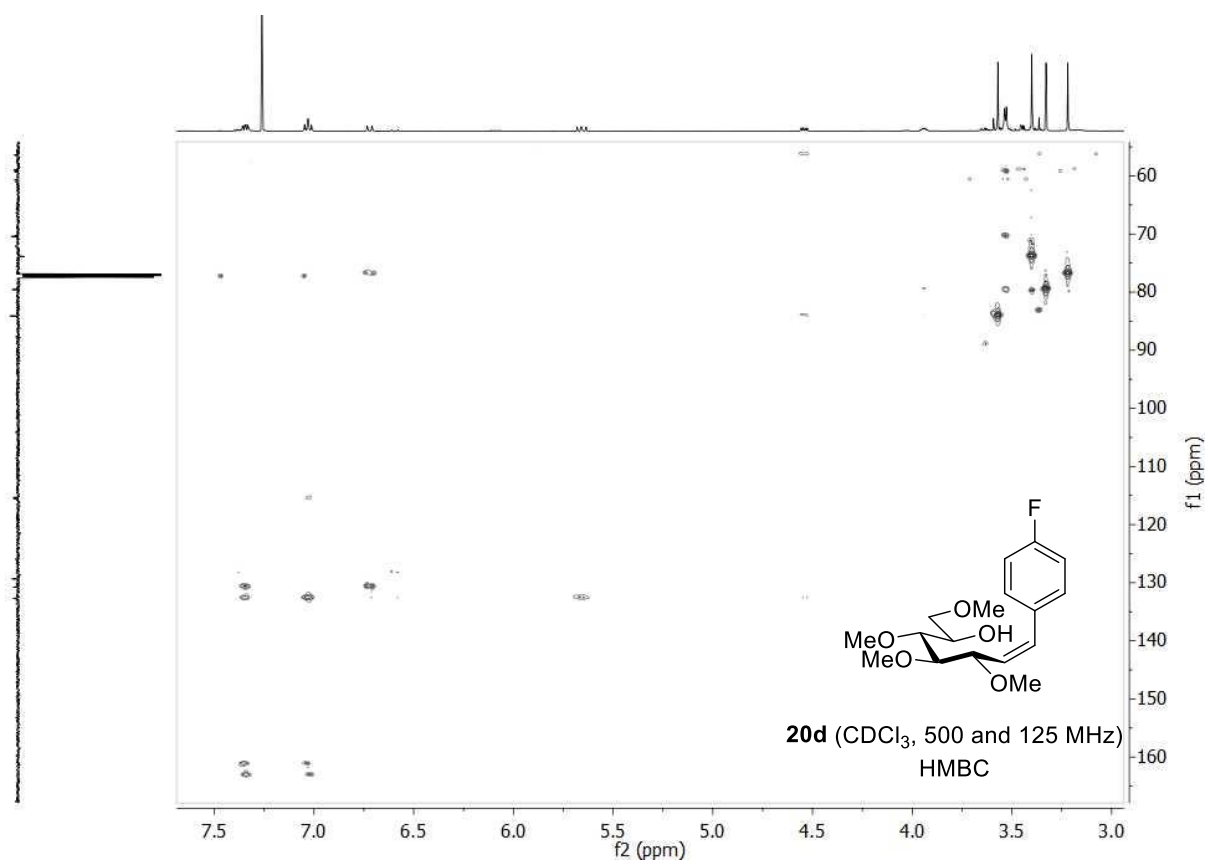

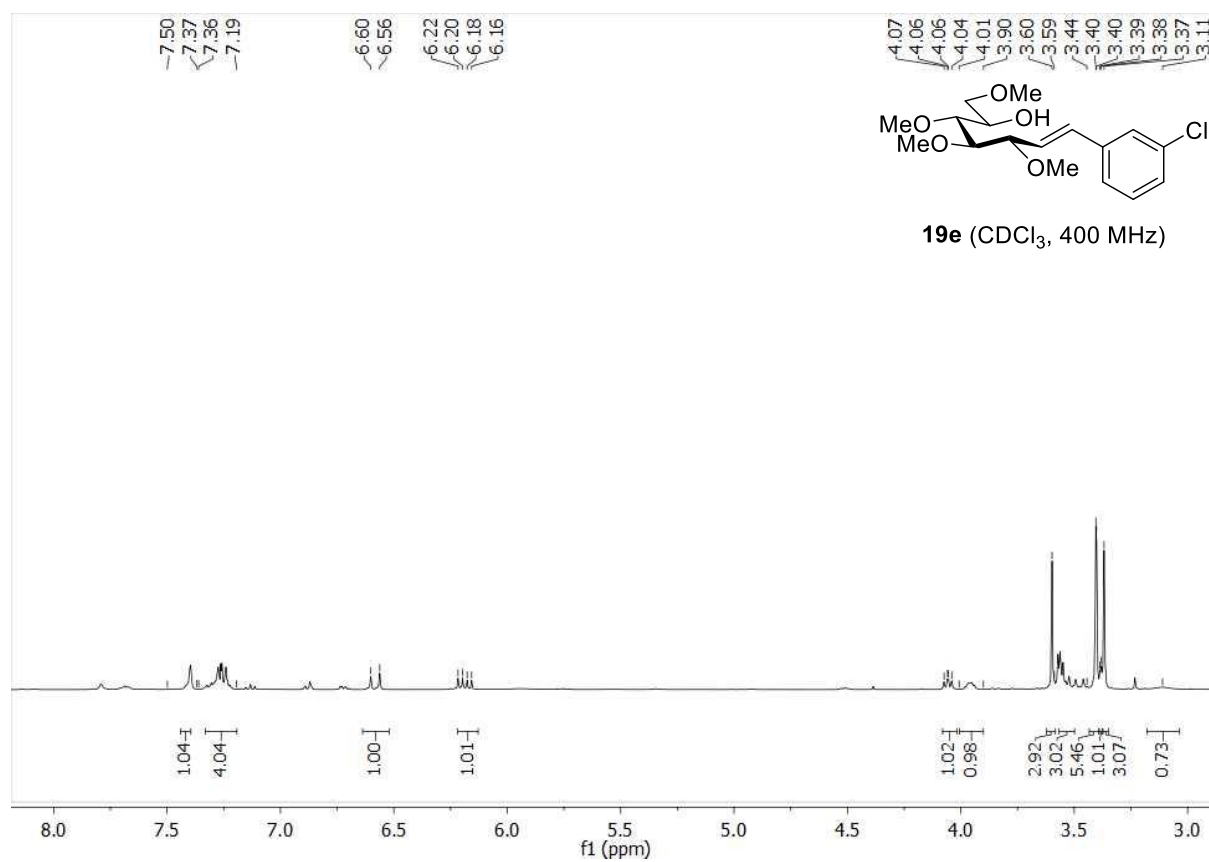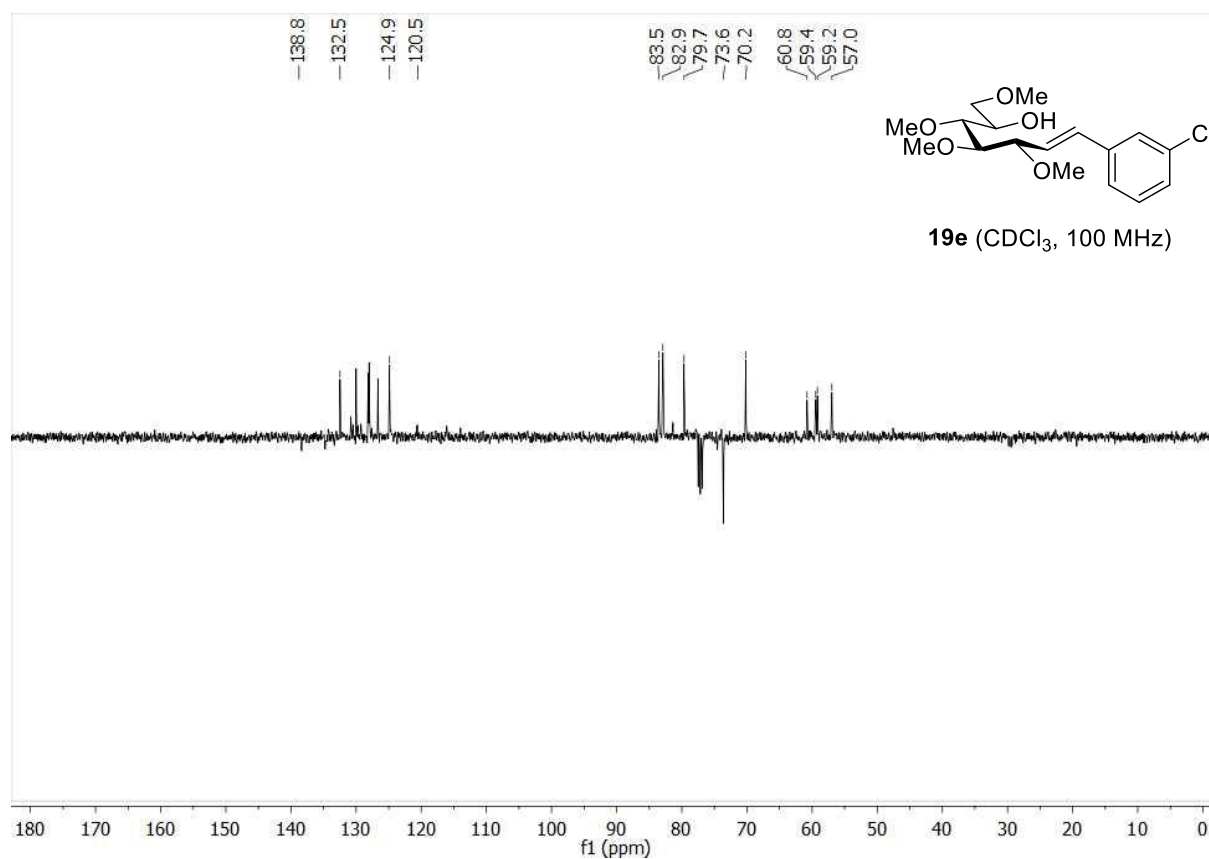



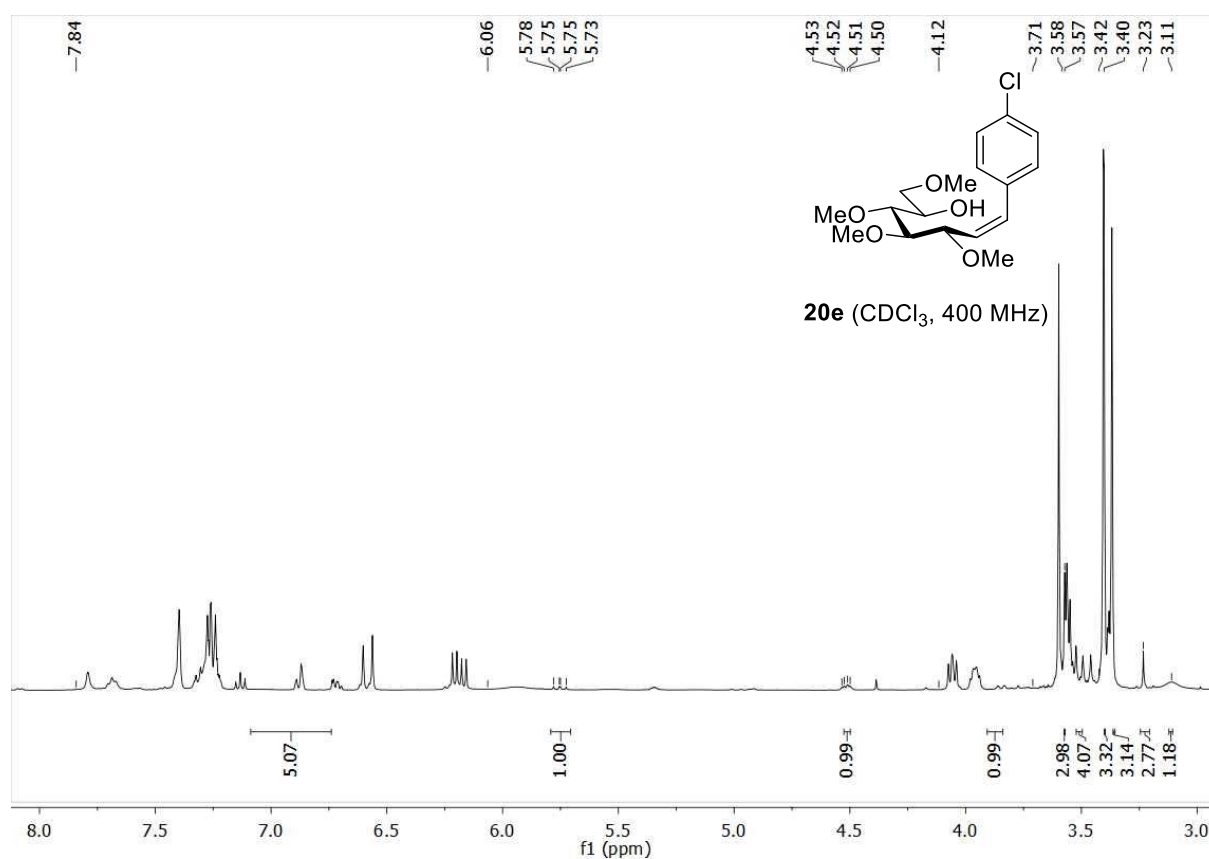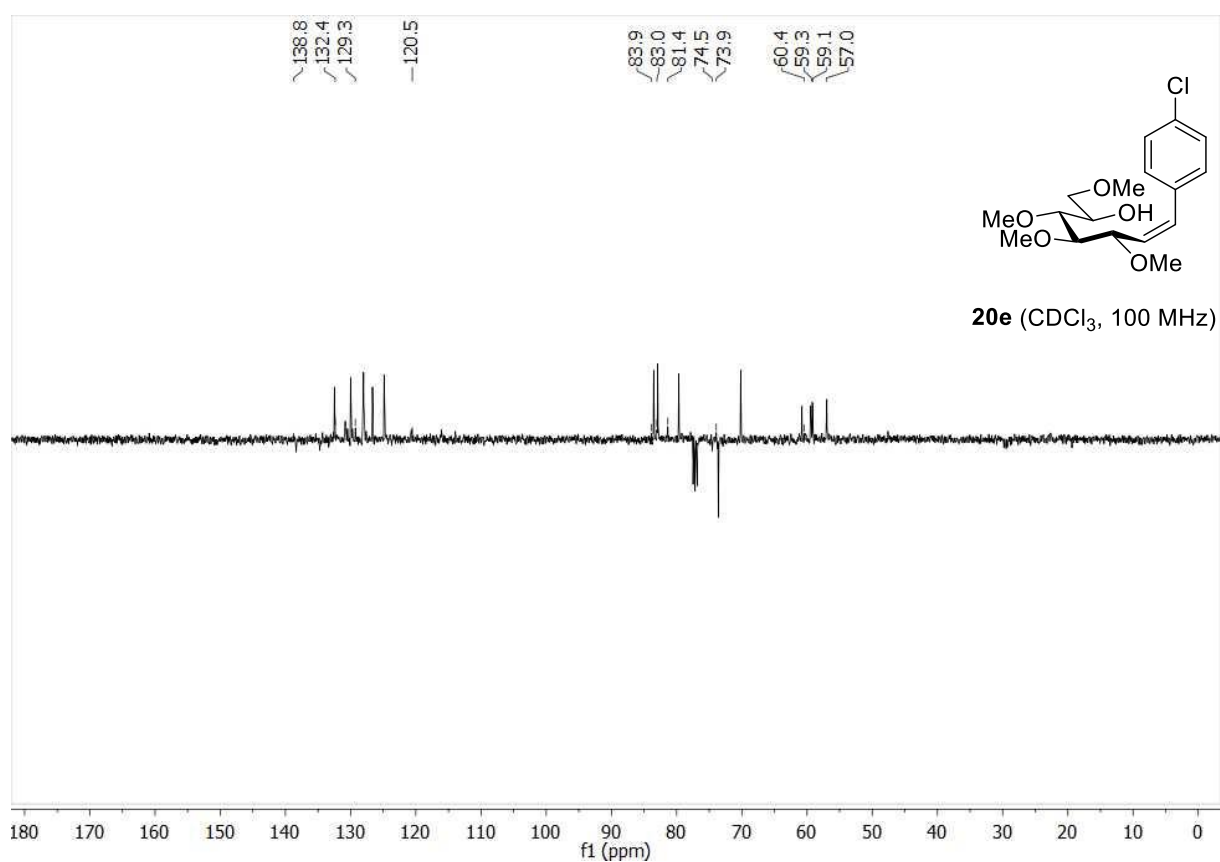

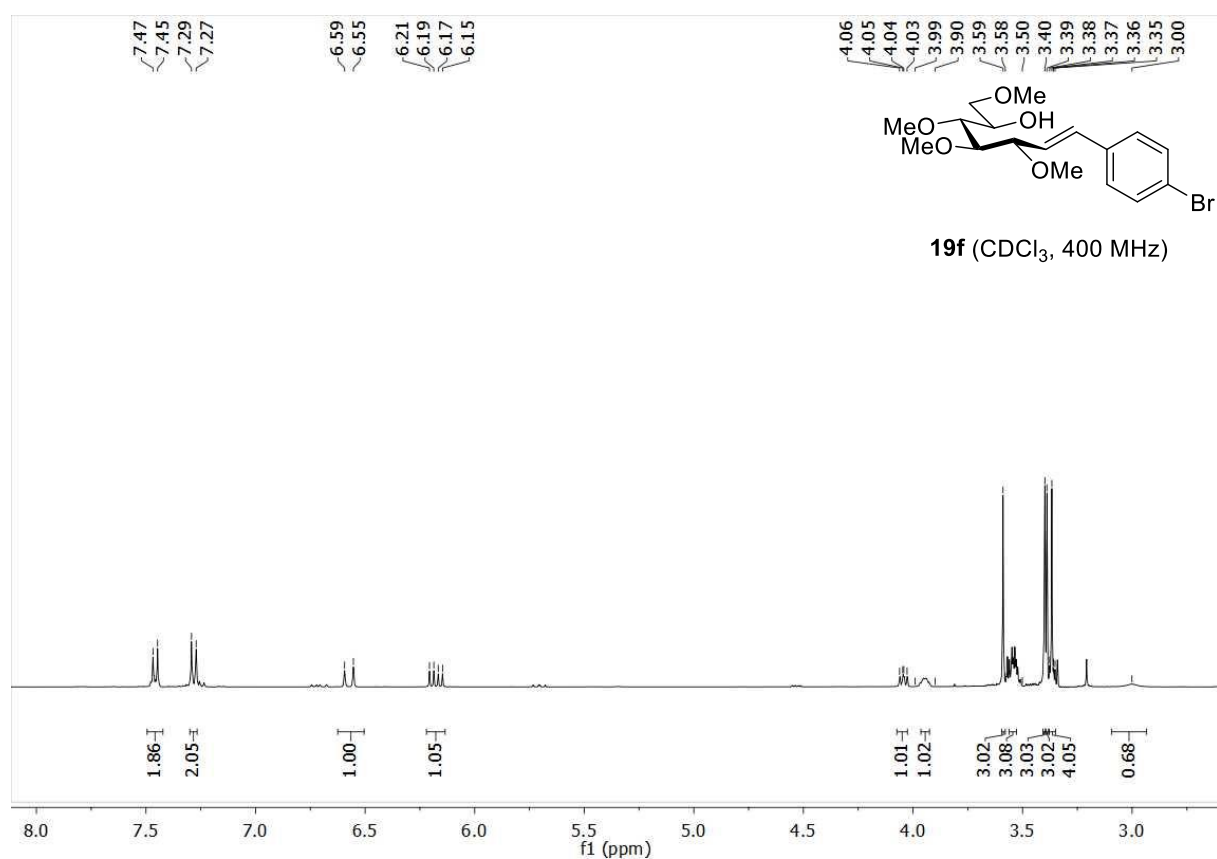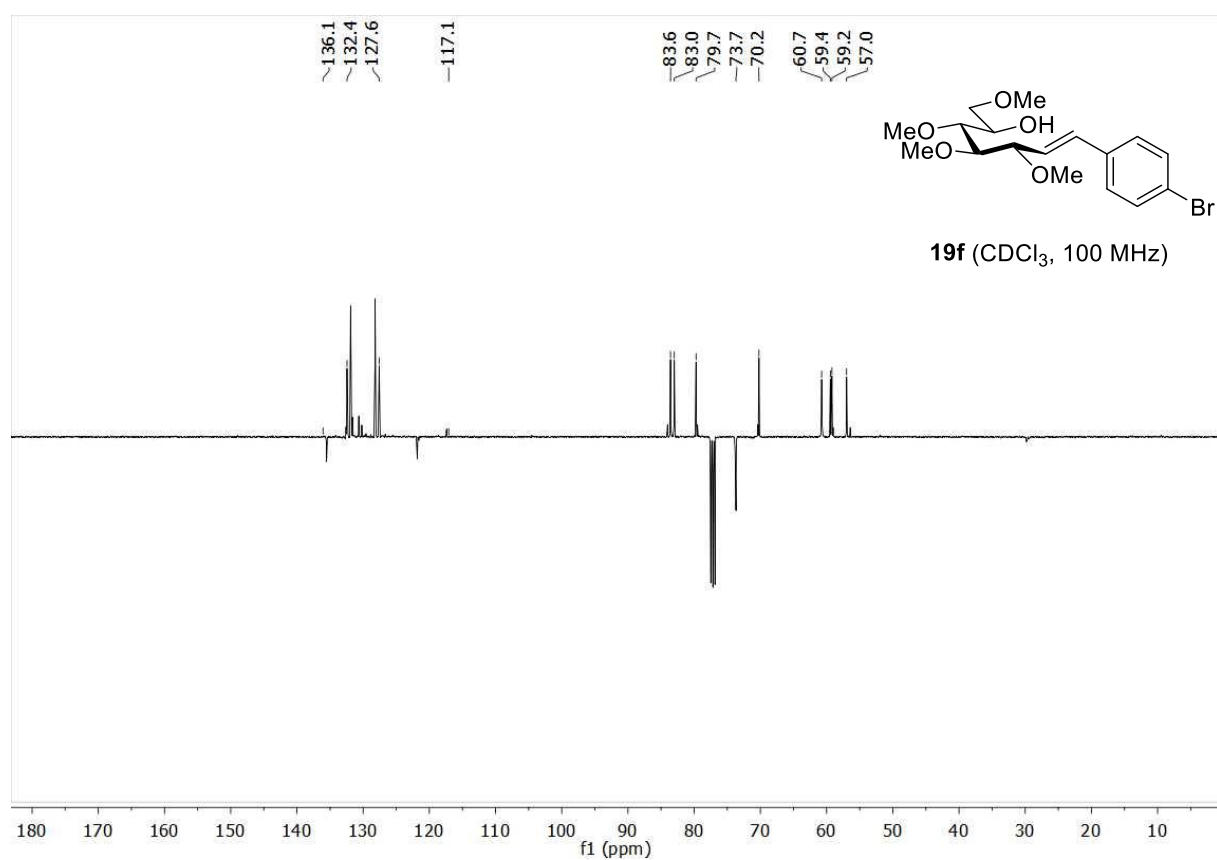

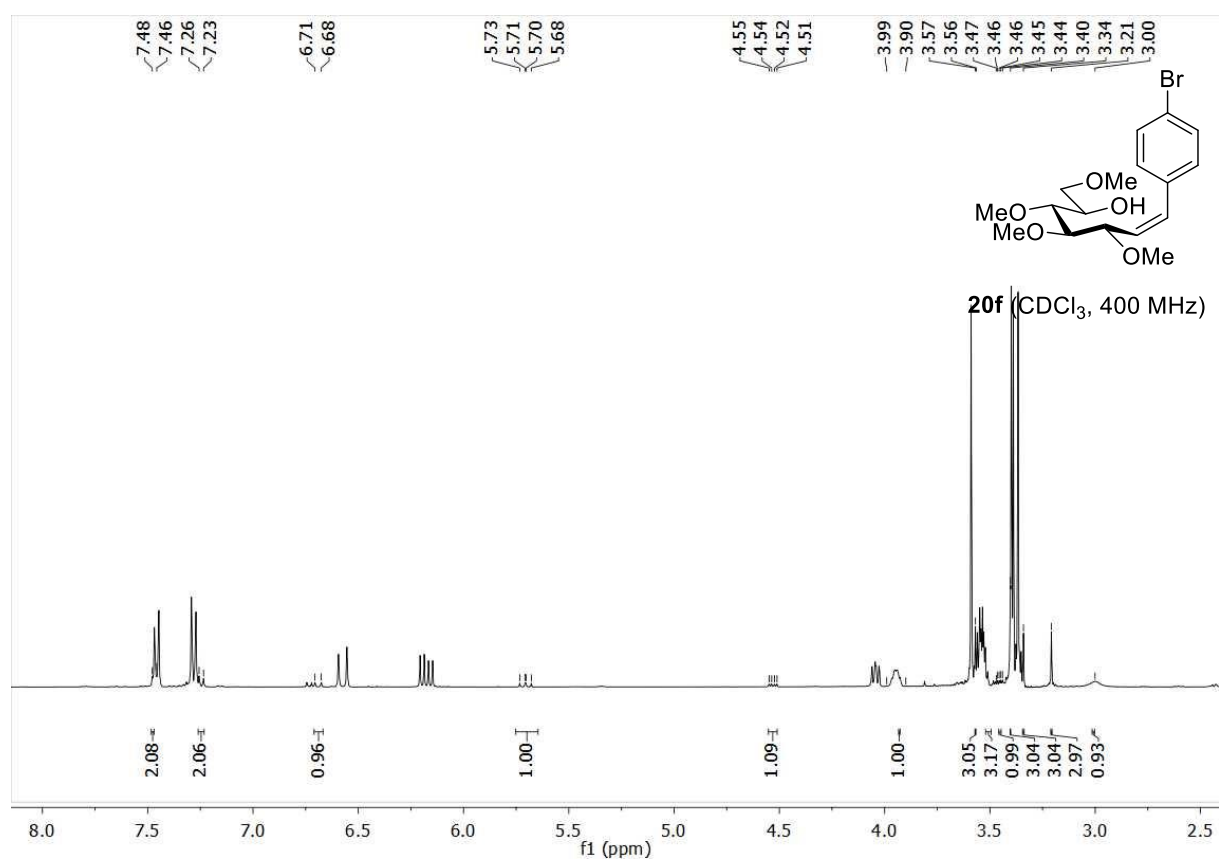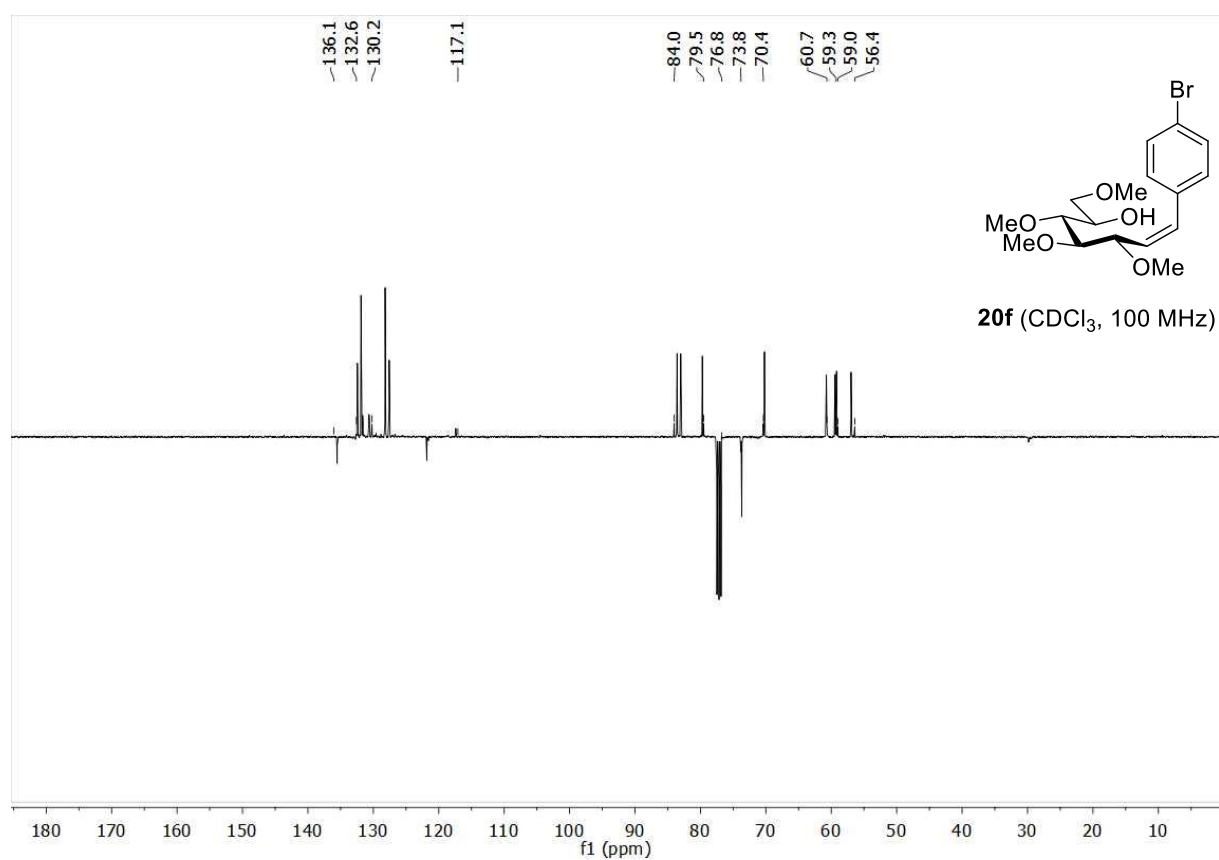

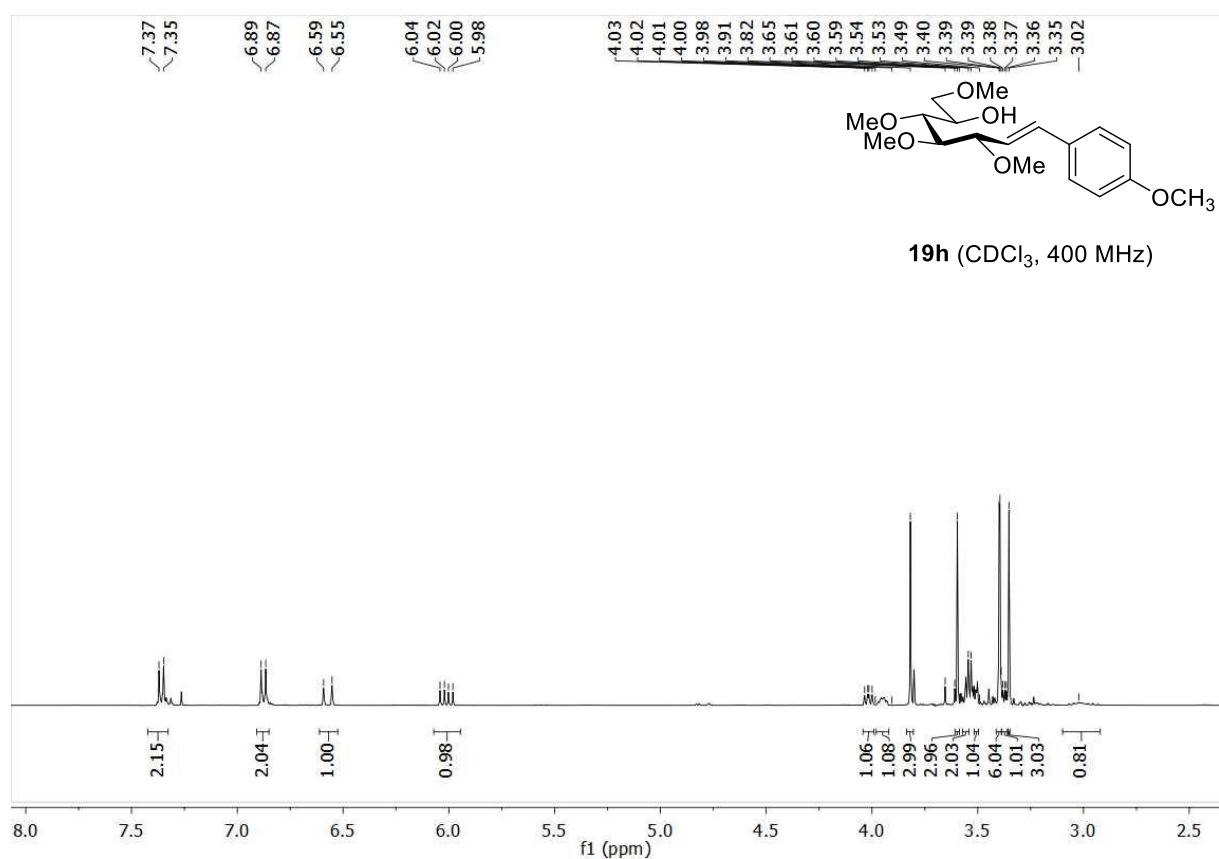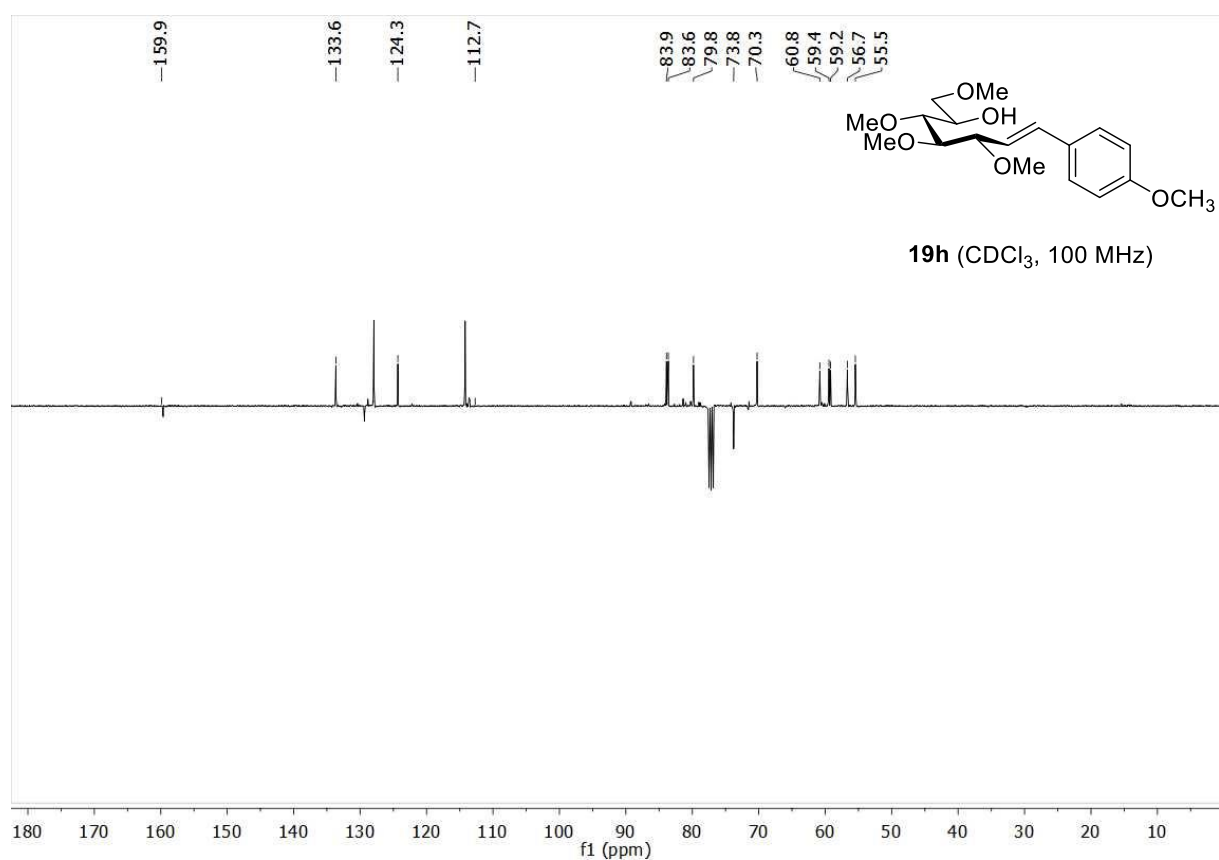

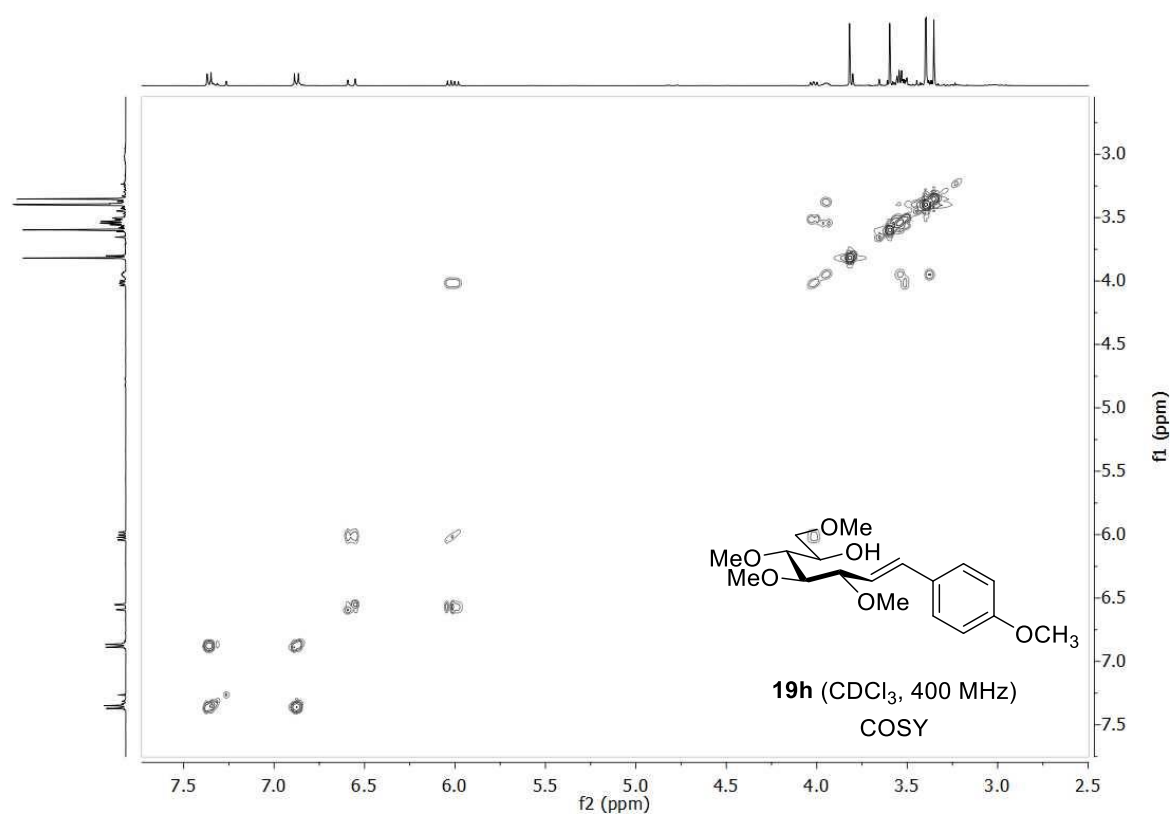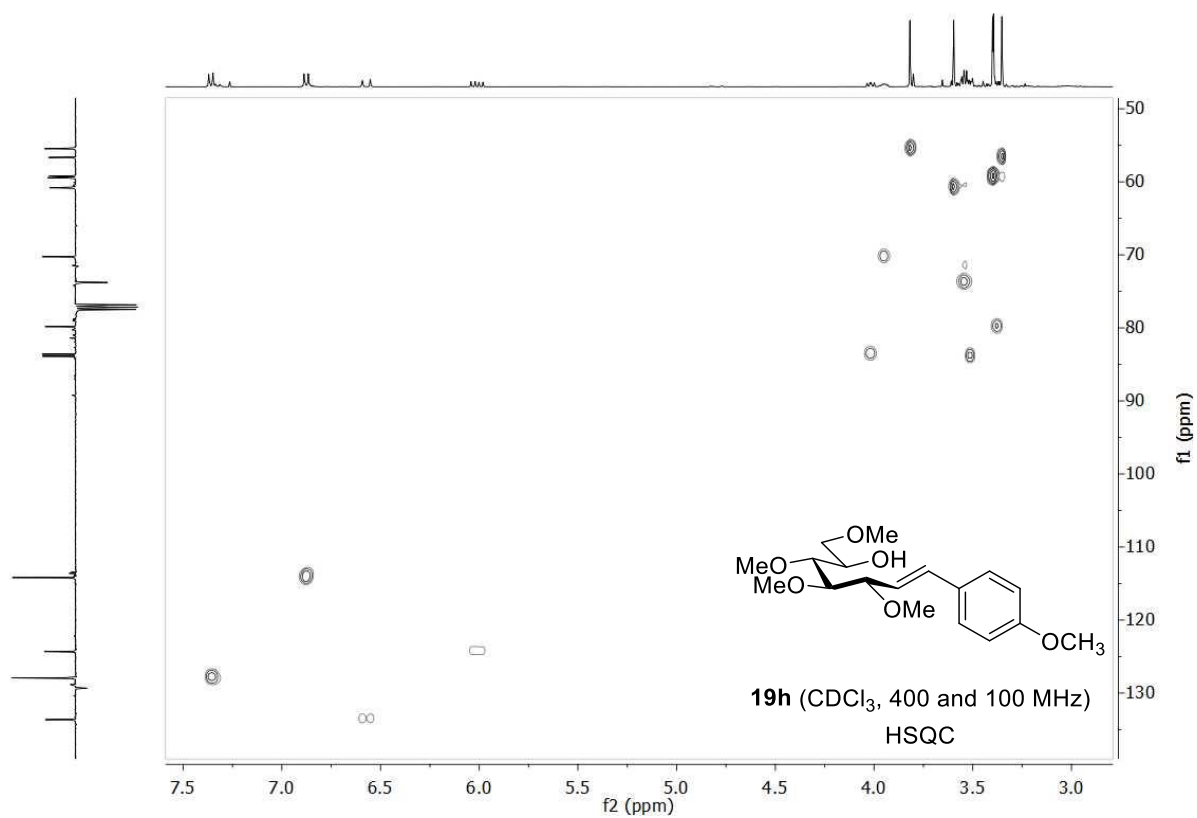

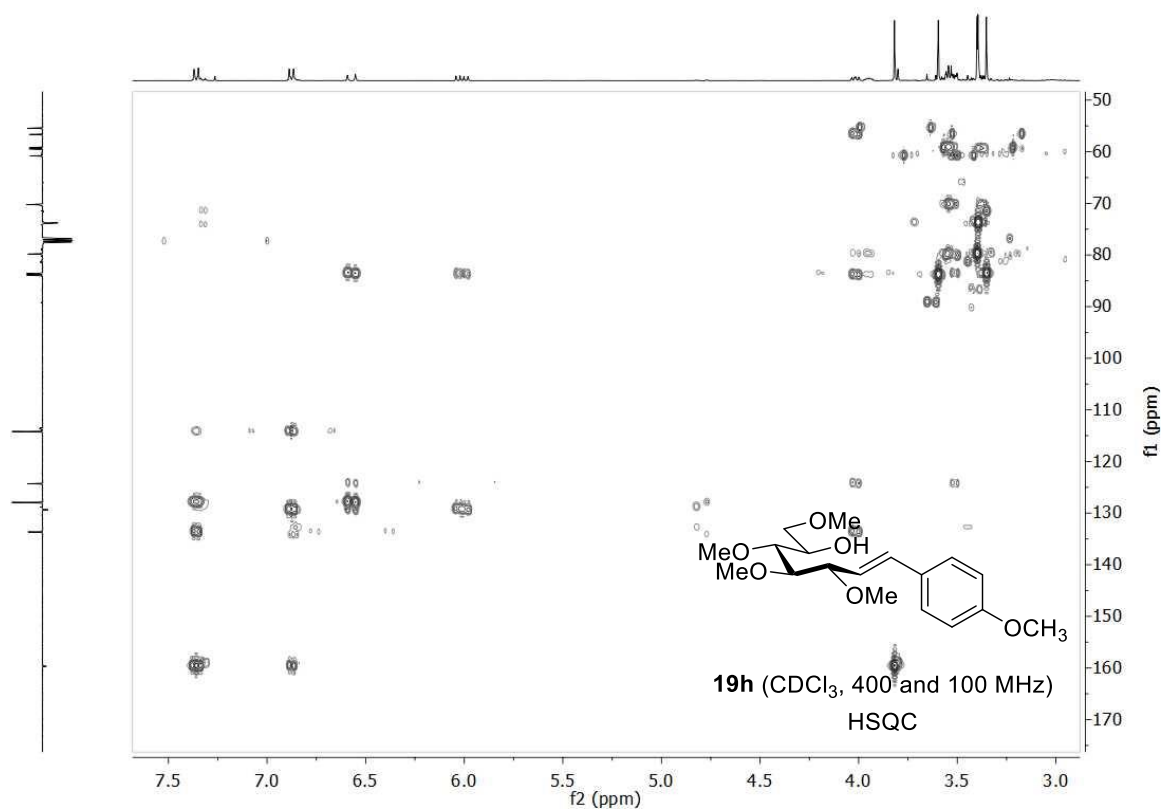

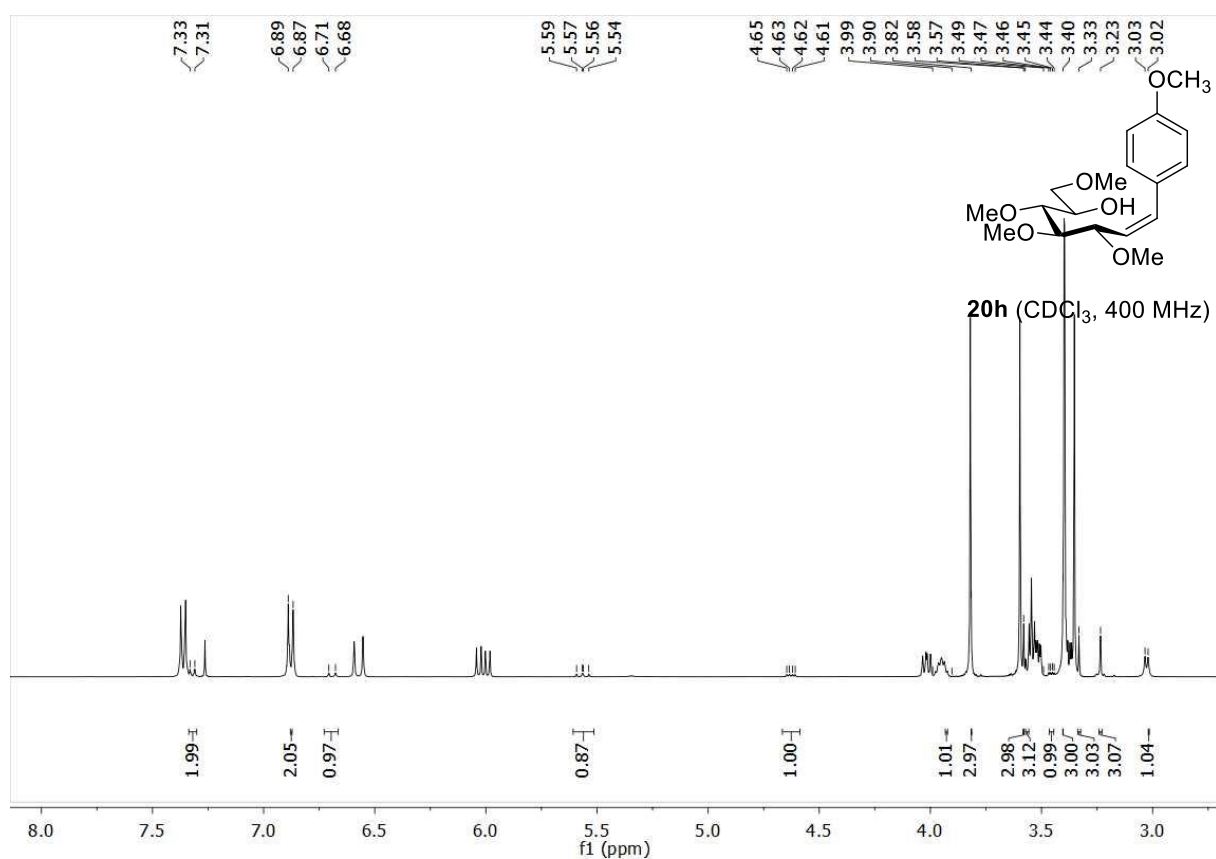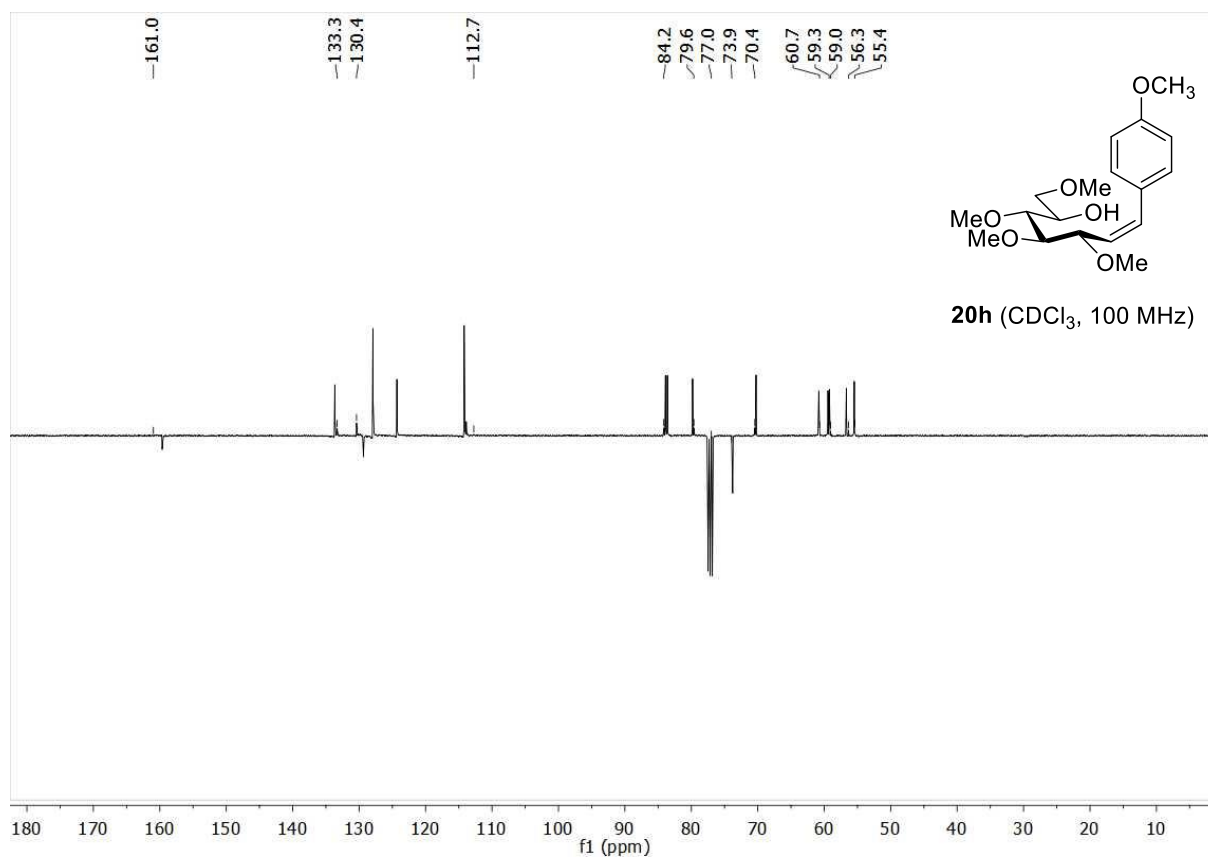

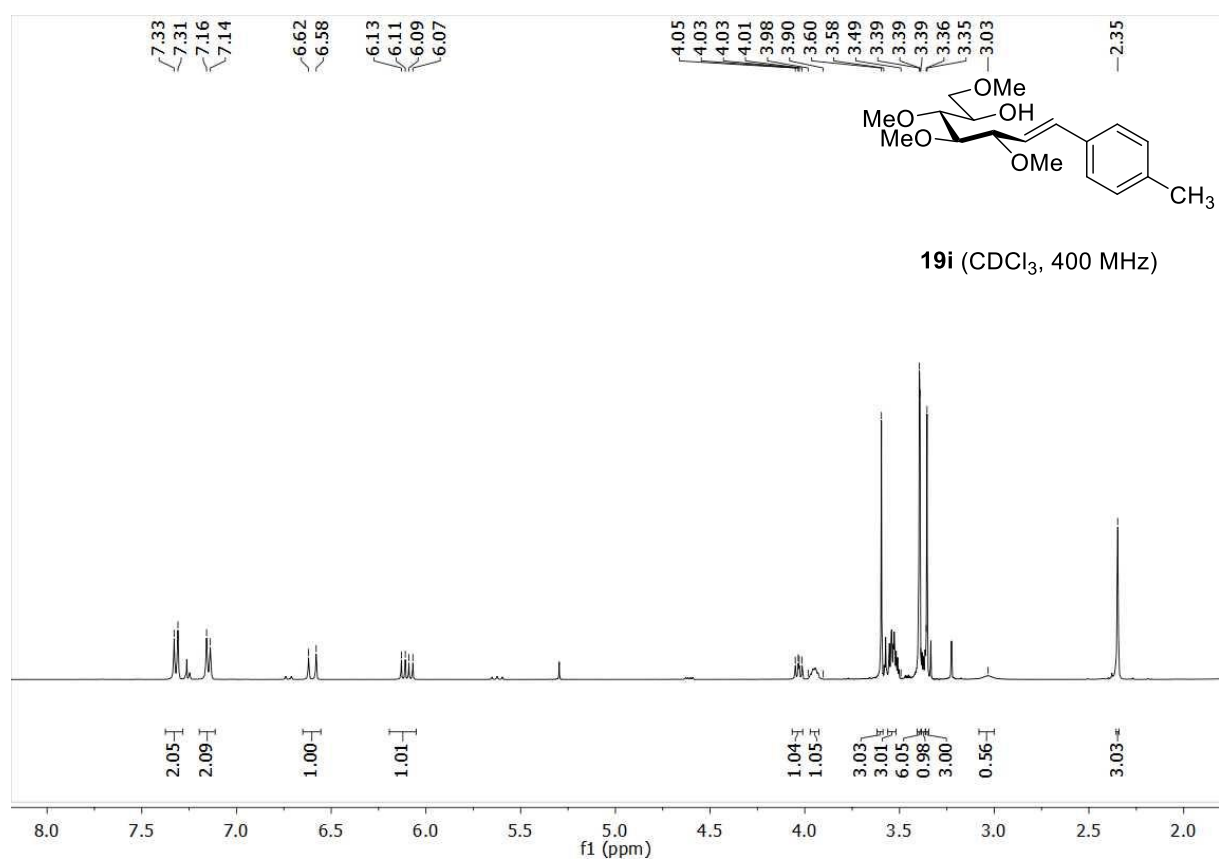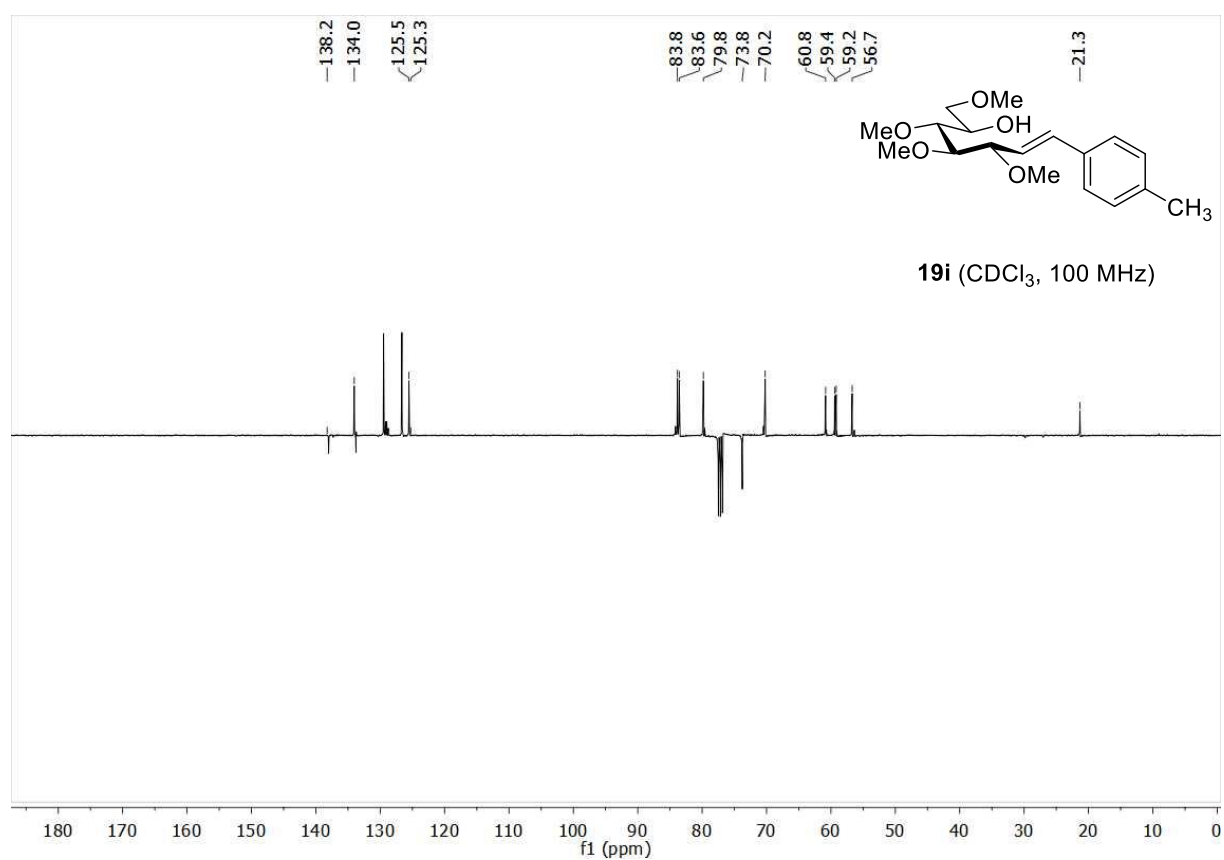



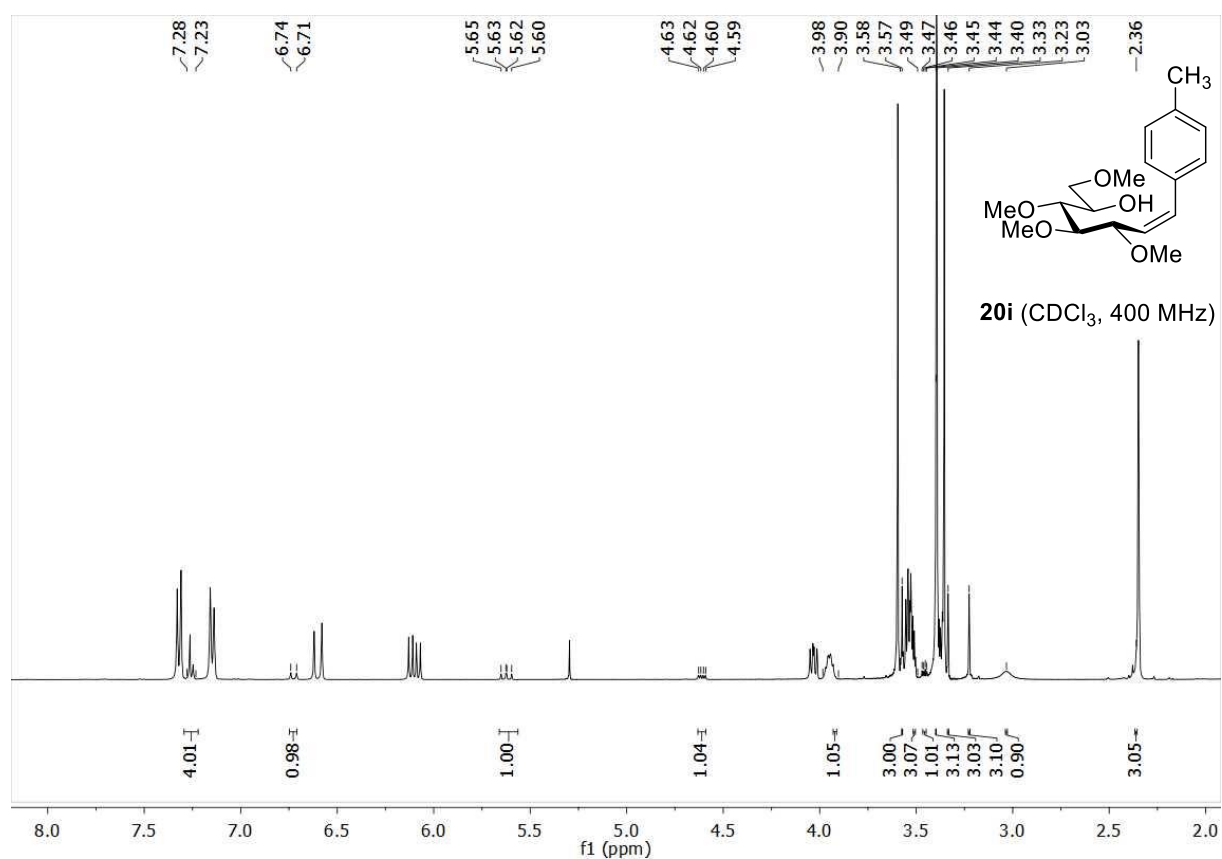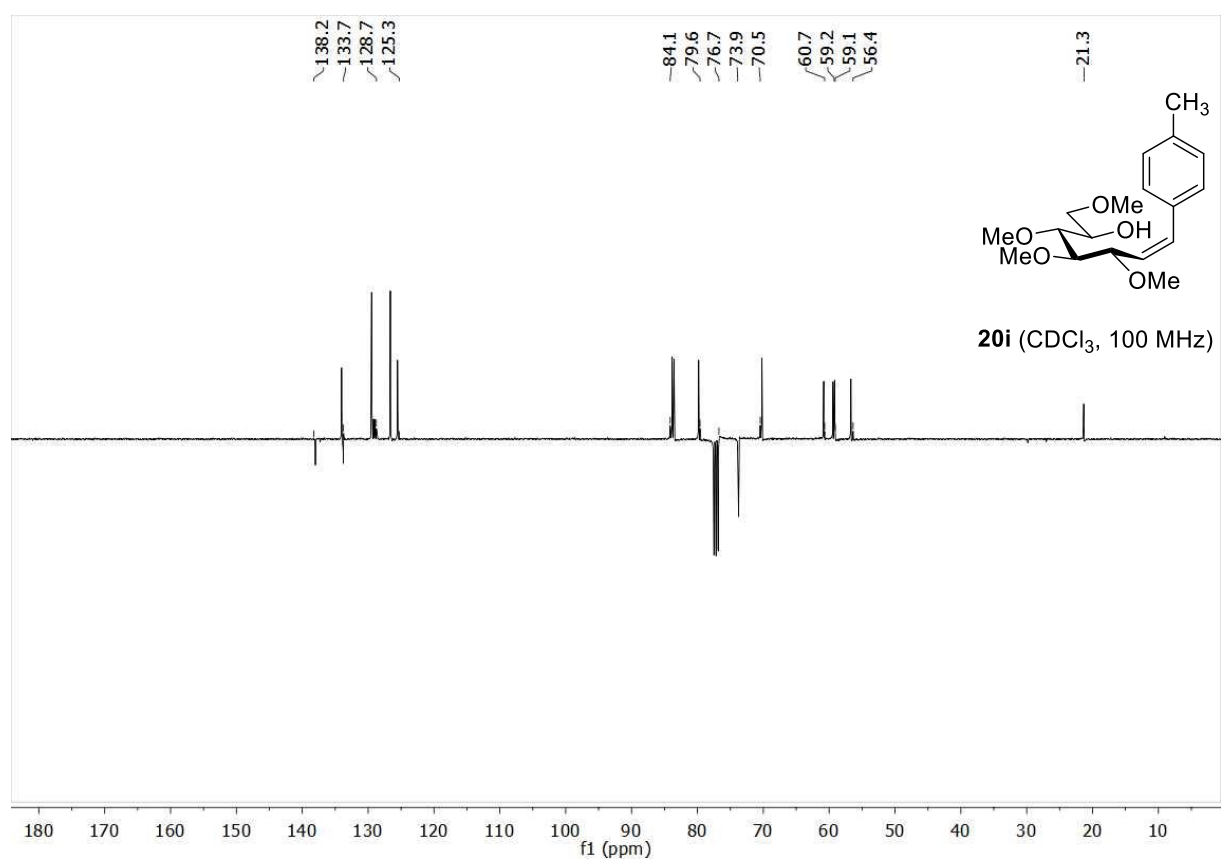

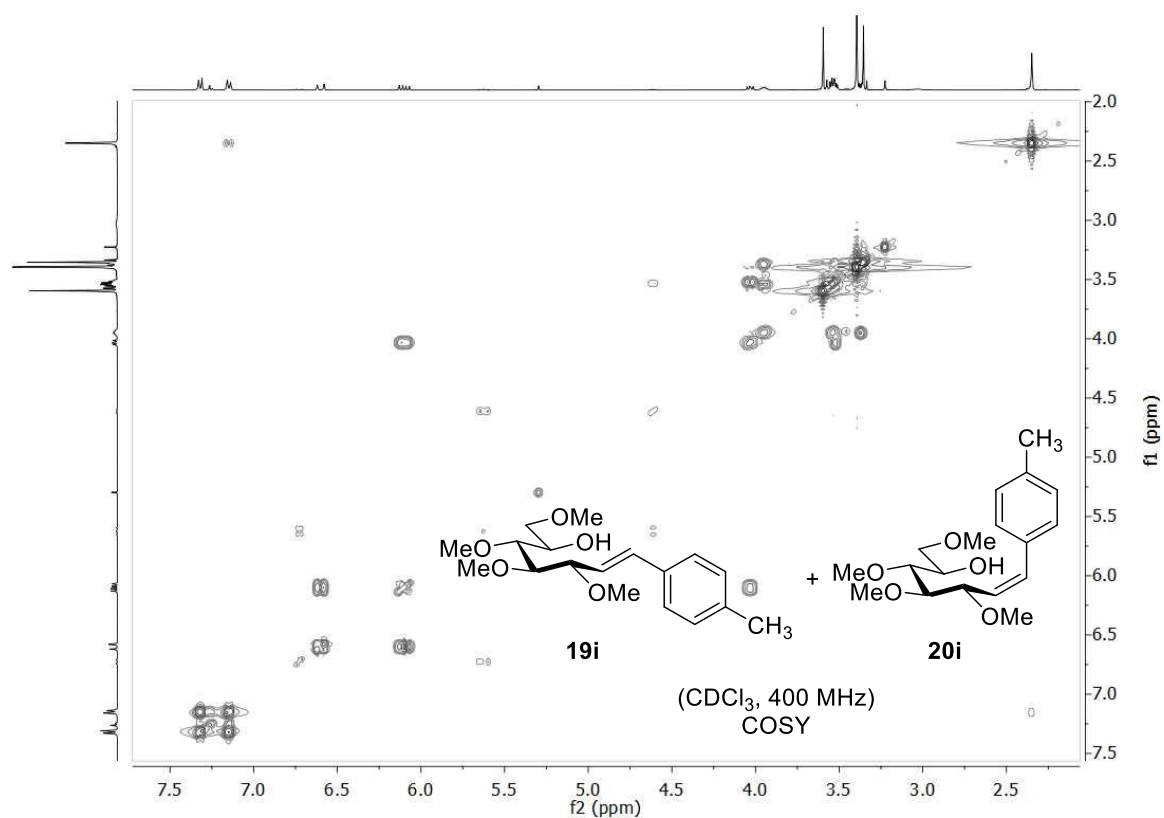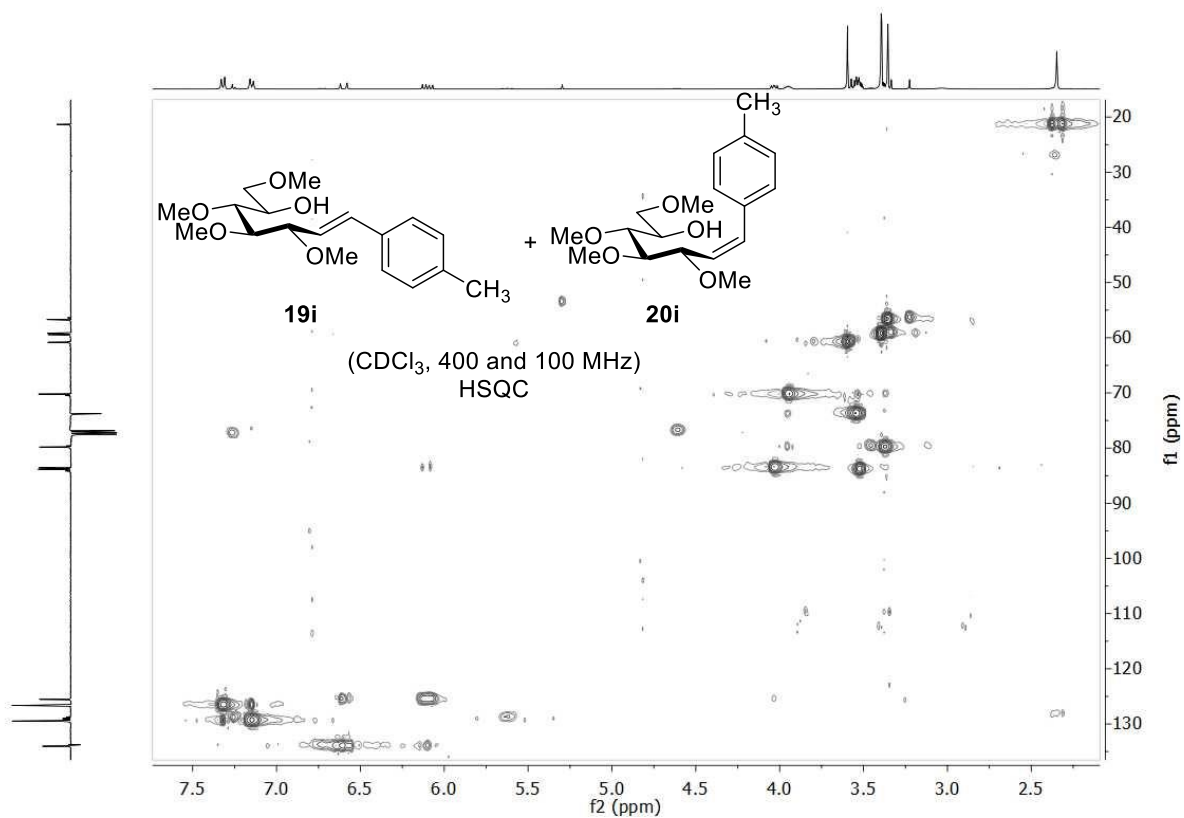

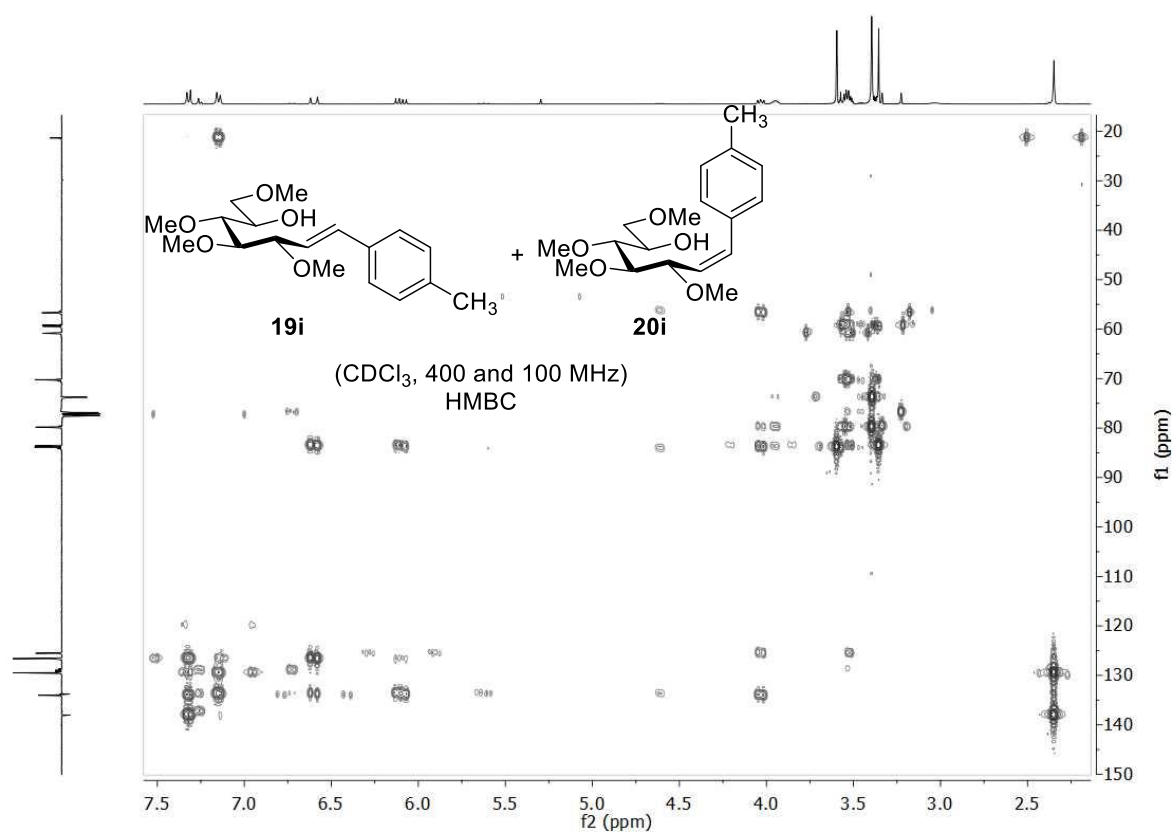

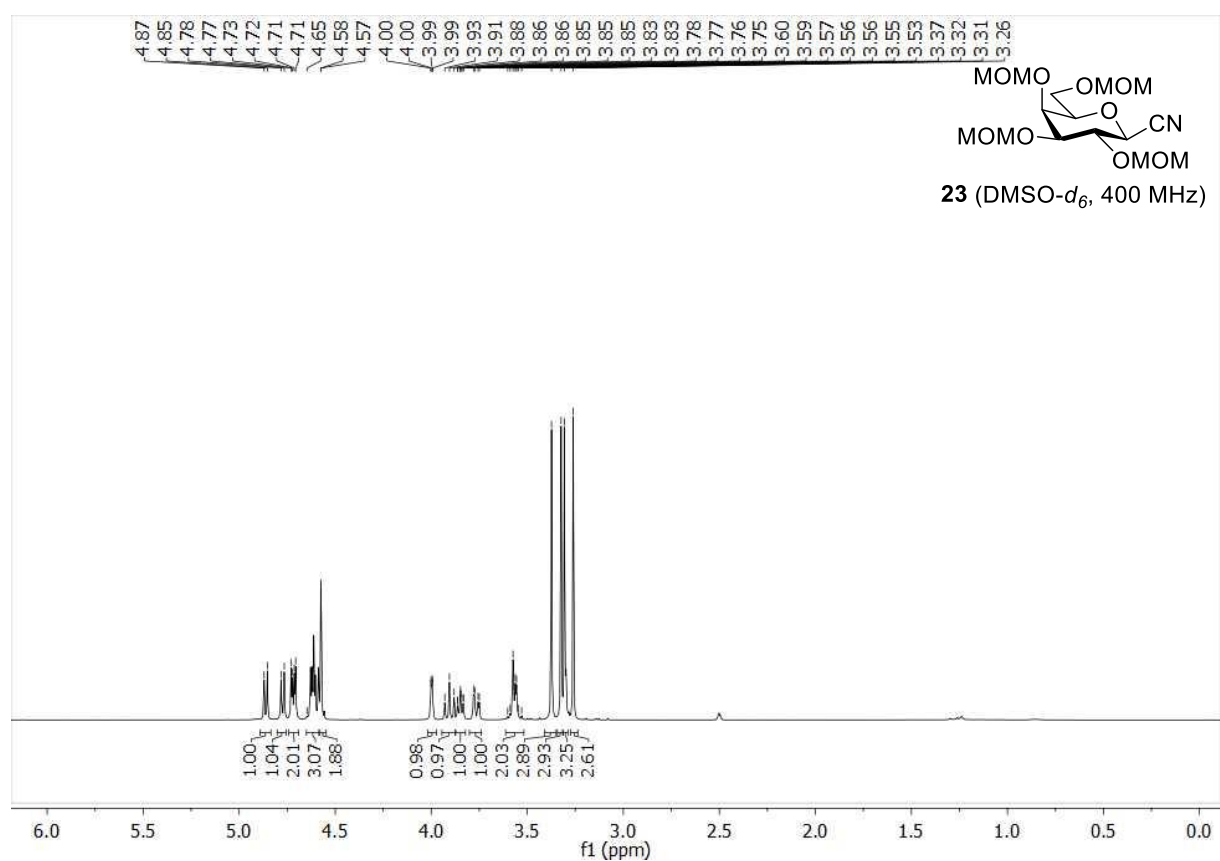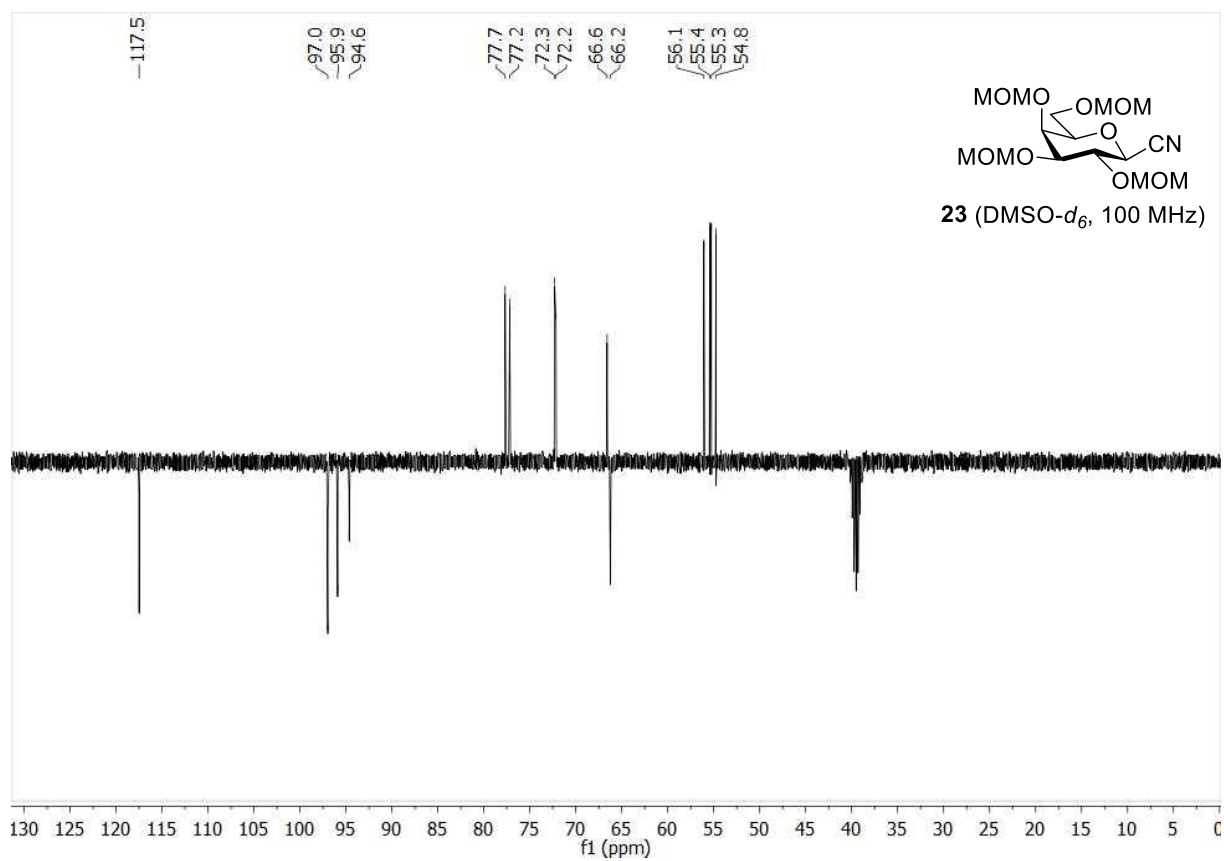

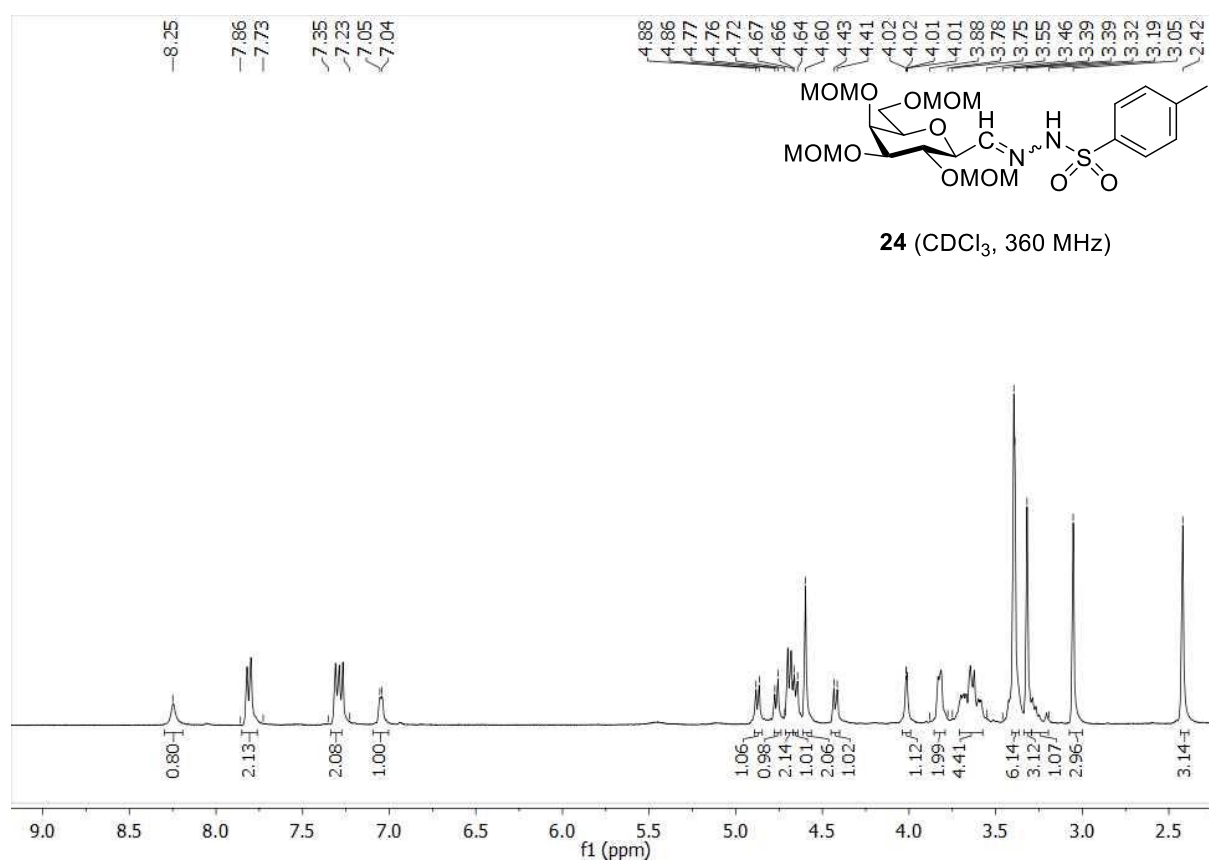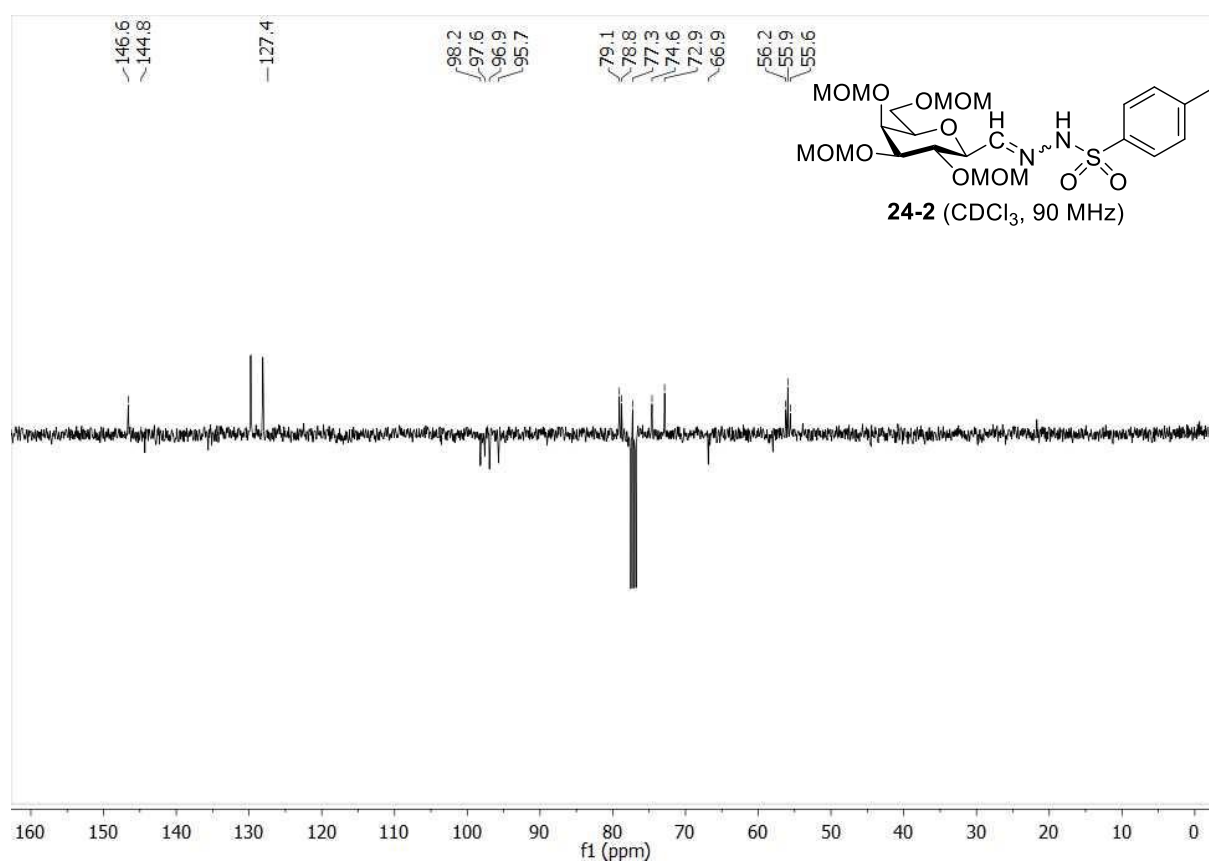

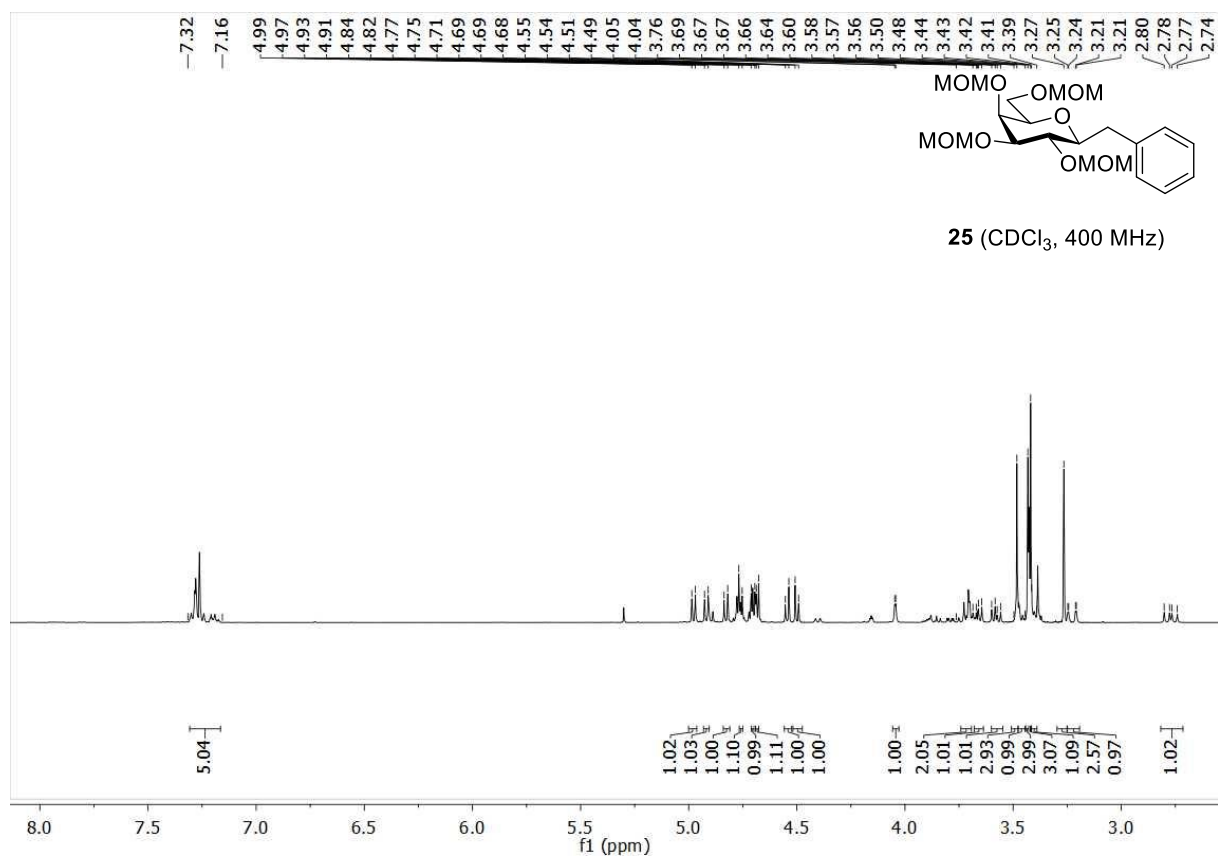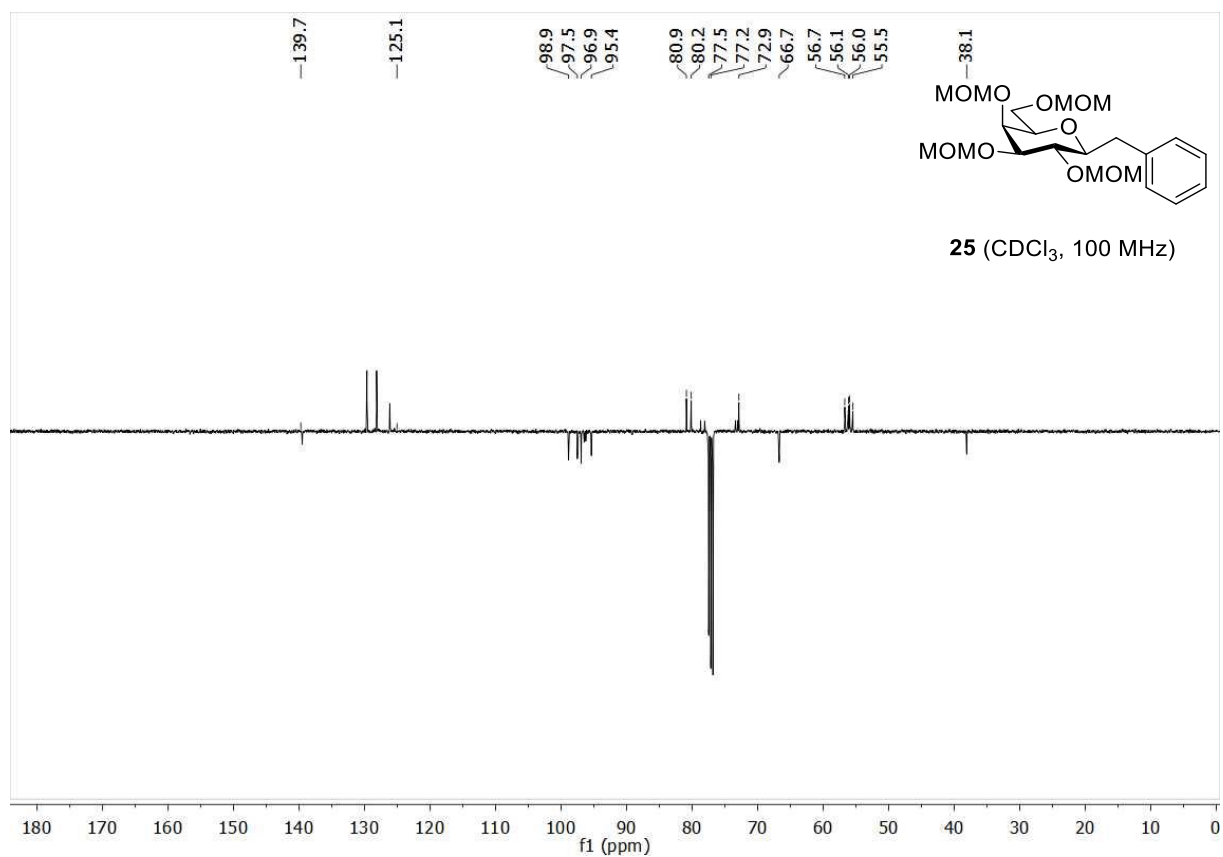

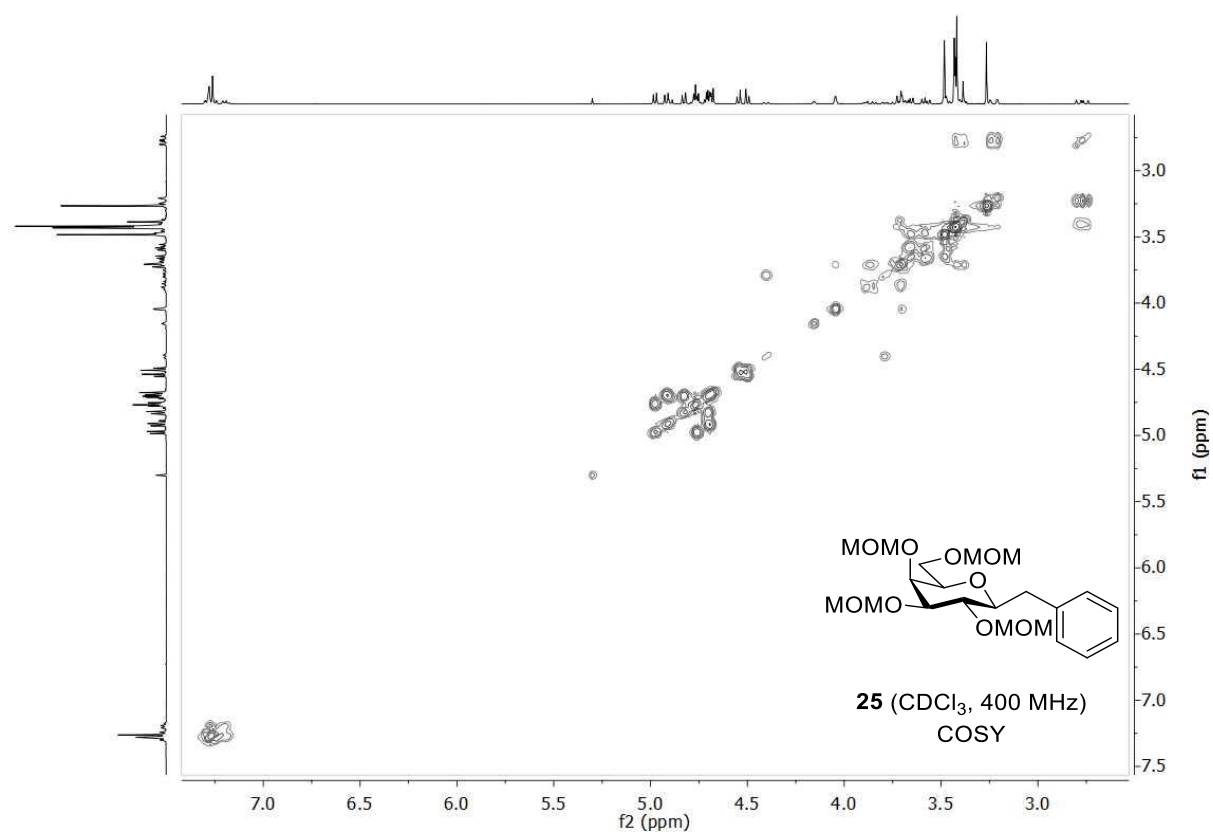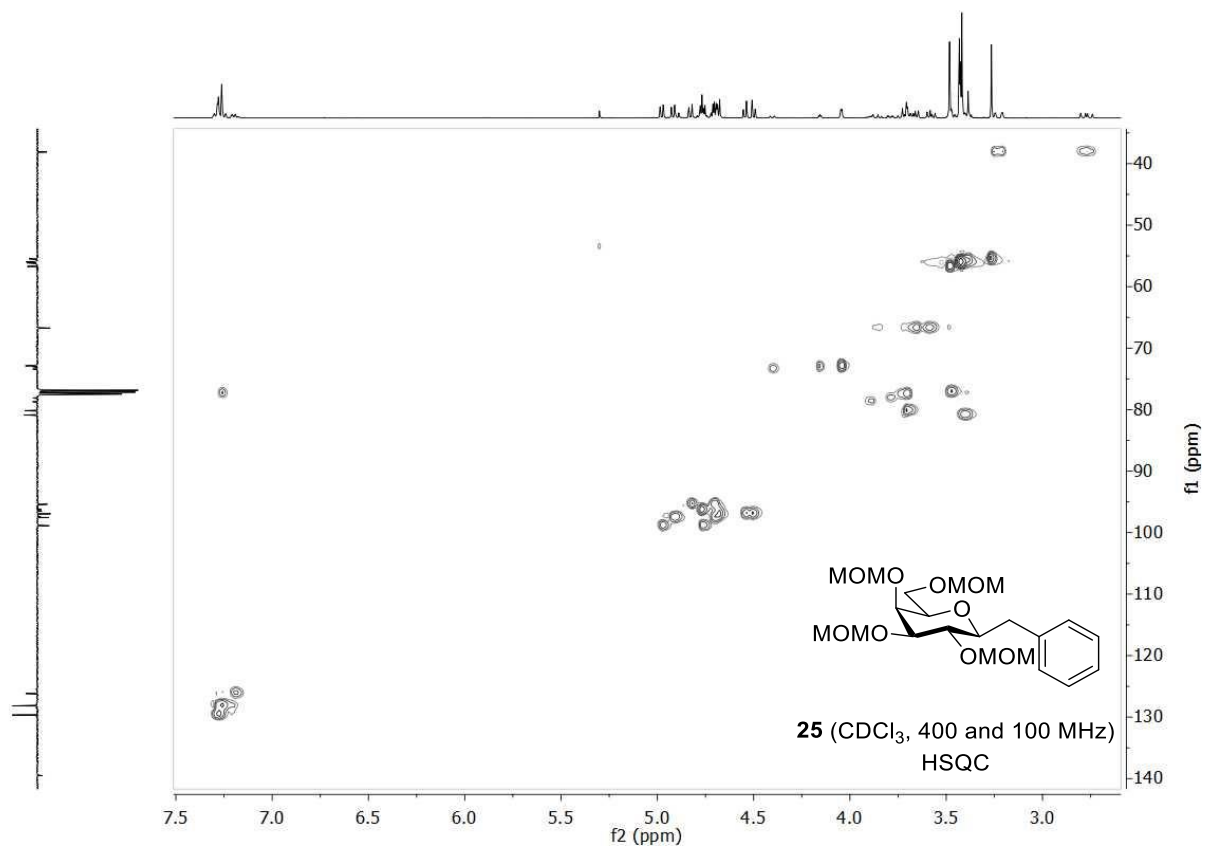

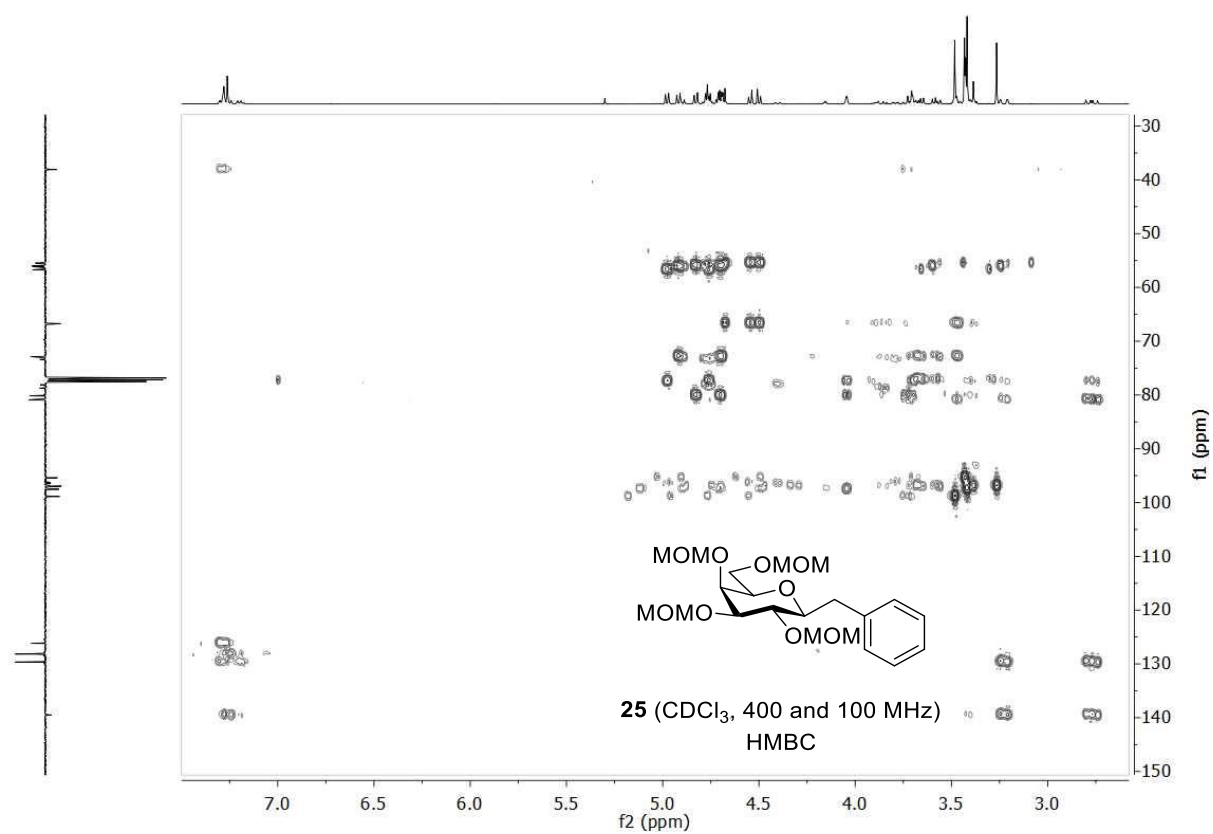



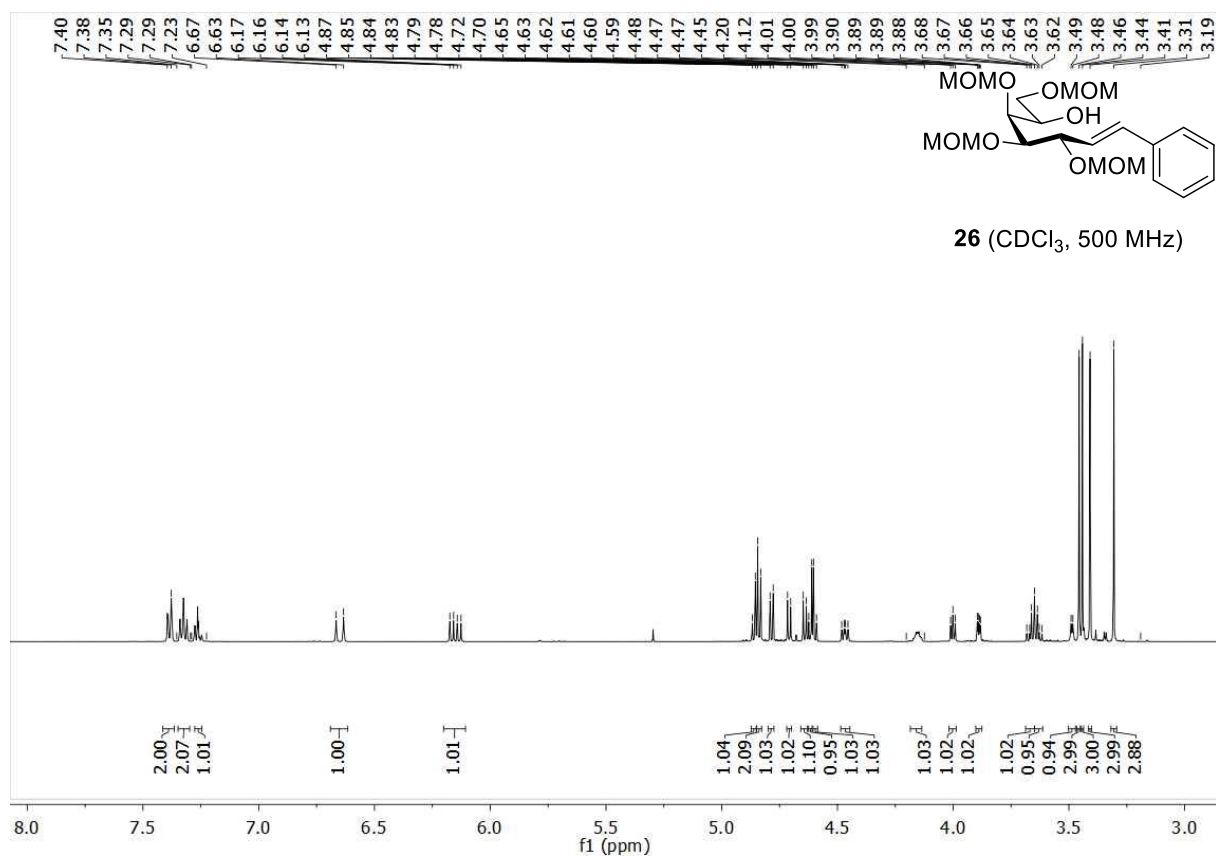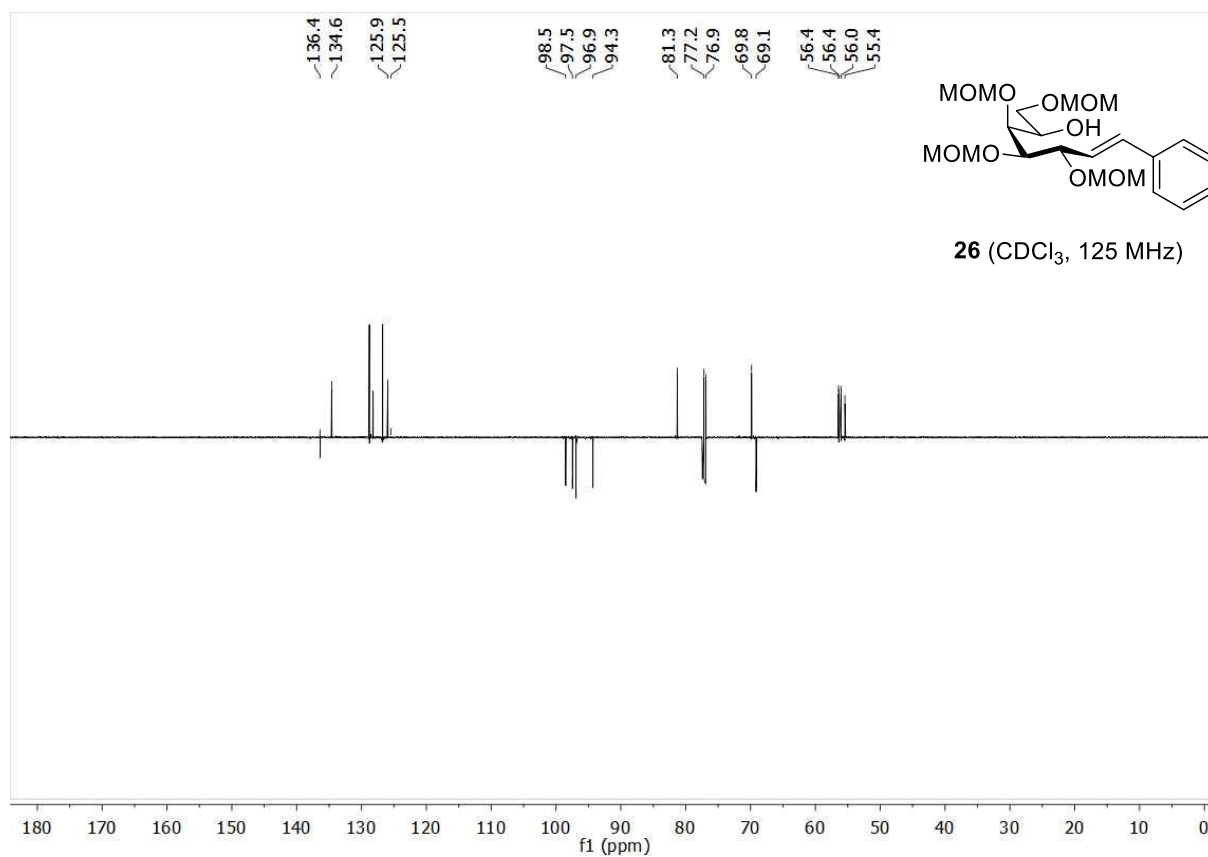

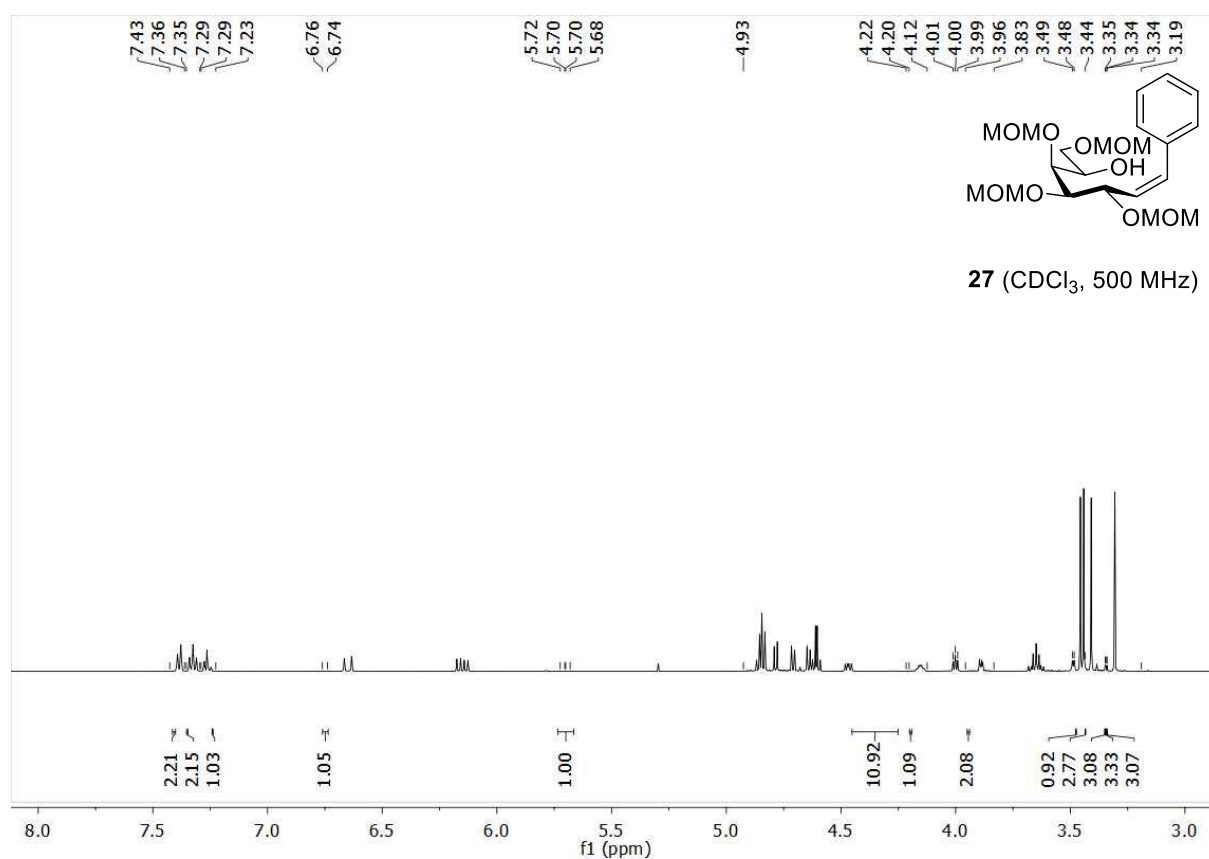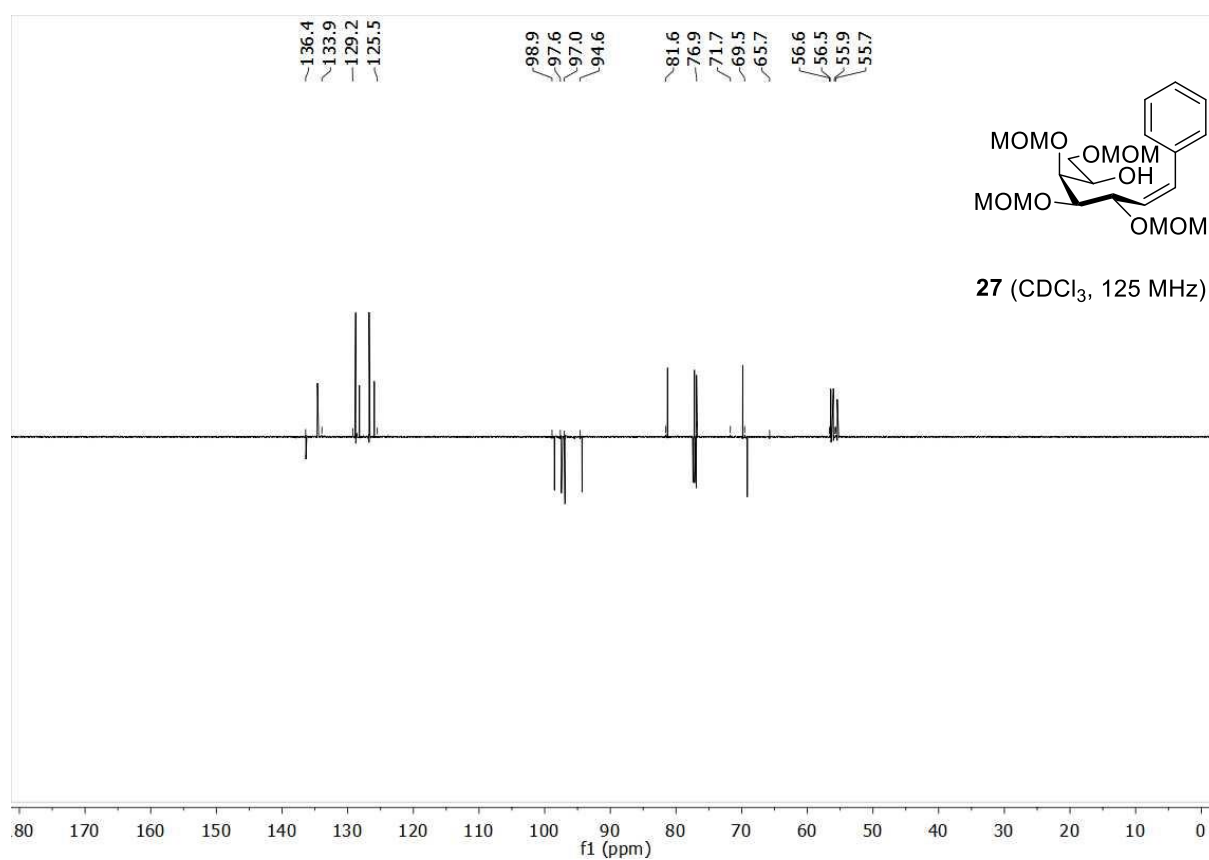

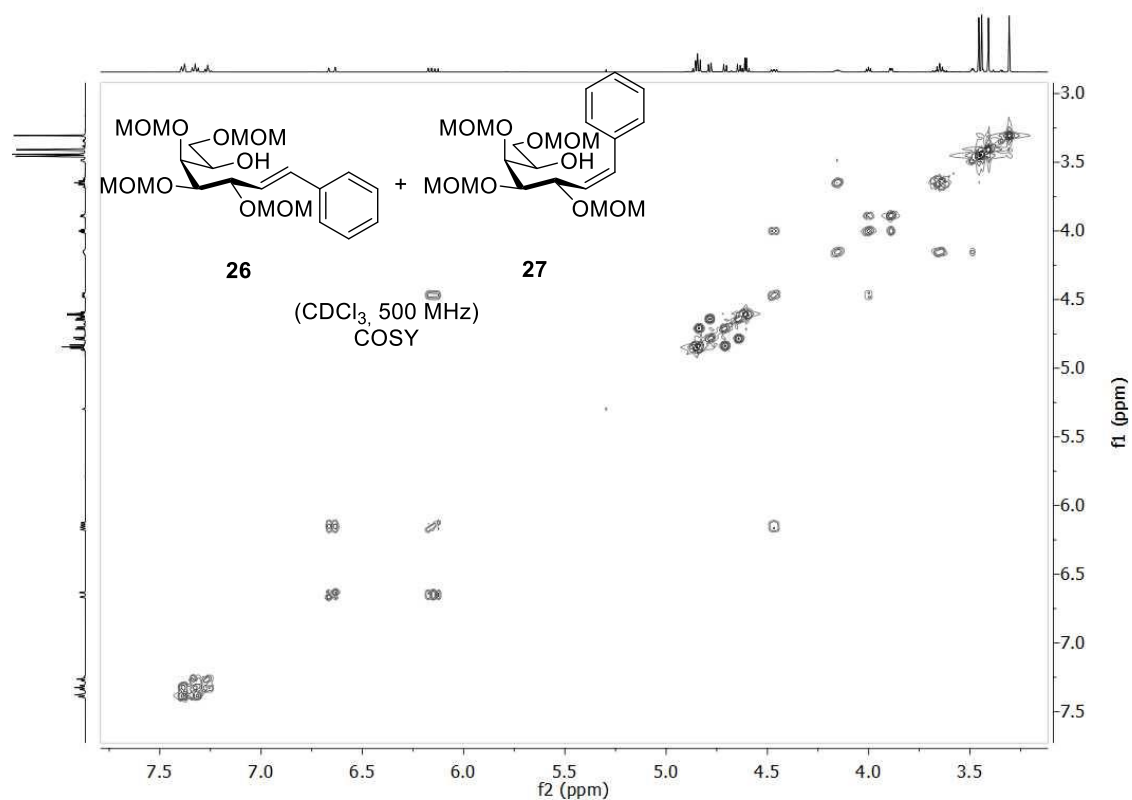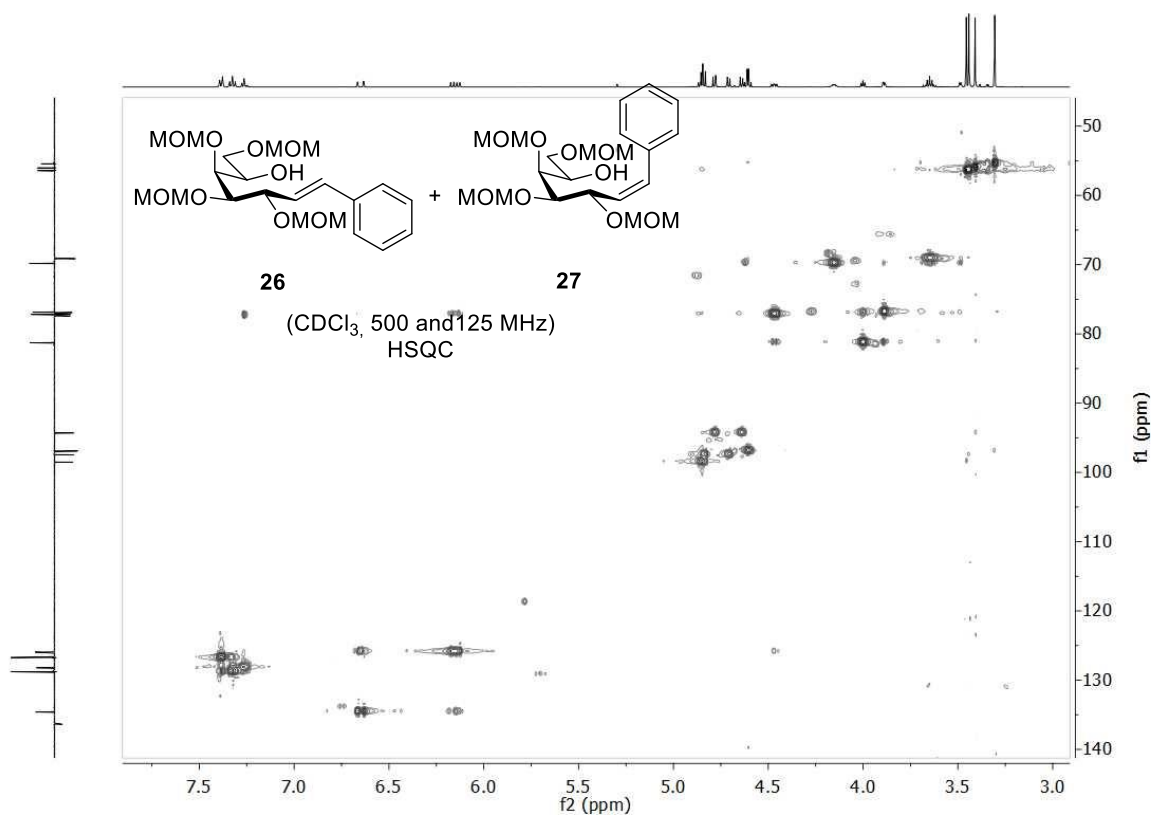

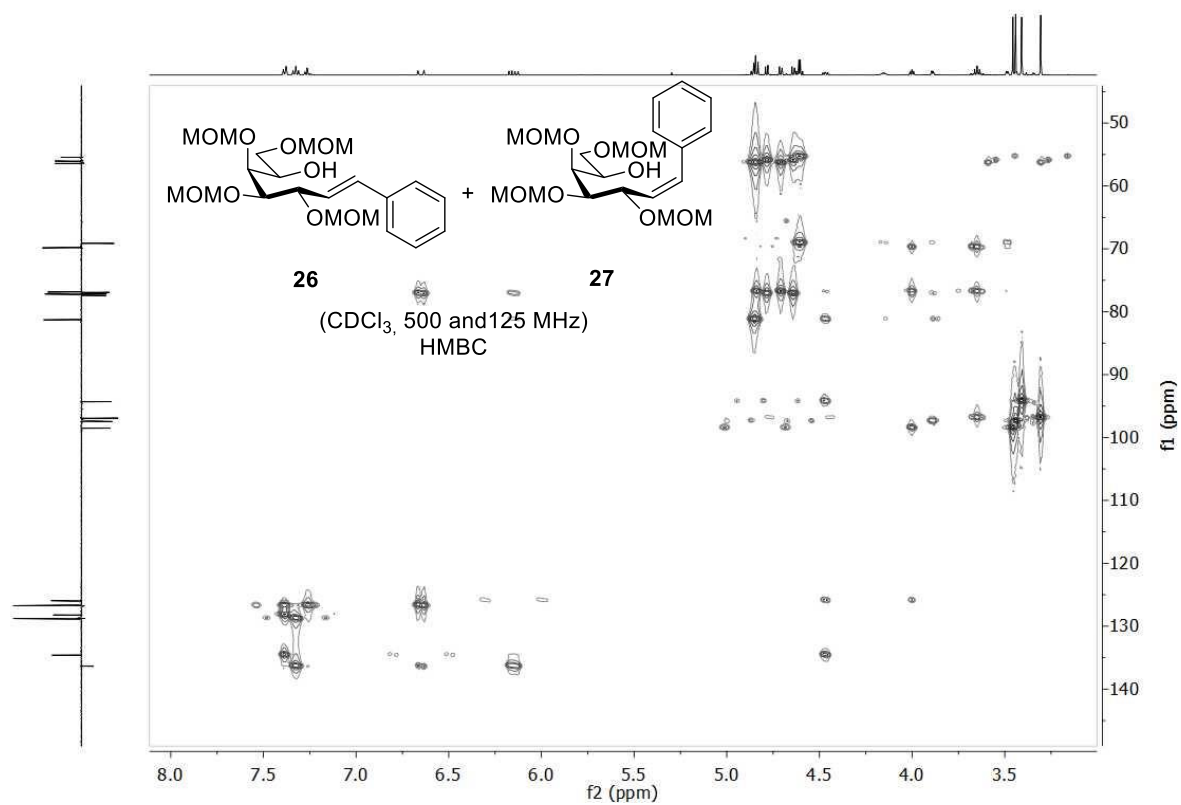

Supplement: s1 [file s1]
